# Supplementary material for: Improving the uptake of systematic reviews: a systematic review of intervention effectiveness and relevance
Source: PubMed Central journal article supplement — BMJ Open. 2014 Oct 16;4(10):e005834. doi: 10.1136/bmjopen-2014-005834 (PMC4202007; doi:10.1136/bmjopen-2014-005834), 2014-10-16
Supplement: bmjopen-2014-005834.draft_revisions.pdf [file bmjopen-2014-005834.draft_revisions.pdf]

# BMJ Open

## IMPROVING THE UPTAKE OF SYSTEMATIC REVIEWS: A SYSTEMATIC REVIEW OF INTERVENTION EFFECTIVENESS AND RELEVANCE

|                                 |                                                                                                                                                                                    |
|---------------------------------|------------------------------------------------------------------------------------------------------------------------------------------------------------------------------------|
| Journal:                        | <i>BMJ Open</i>                                                                                                                                                                    |
| Manuscript ID:                  | bmjopen-2014-005834                                                                                                                                                                |
| Article Type:                   | Research                                                                                                                                                                           |
| Date Submitted by the Author:   | 10-Jun-2014                                                                                                                                                                        |
| Complete List of Authors:       | Wallace, John; University of Oxford, Continuing Education<br>Byrne, Charles; Health Service Executive, Dept of Psychiatry<br>Clarke, Mike; Oxford University, Continuing Education |
| <b>Primary Subject Heading</b>: | Medical education and training                                                                                                                                                     |
| Secondary Subject Heading:      | Evidence based practice, Qualitative research, Health informatics                                                                                                                  |
| Keywords:                       | Health informatics < BIOTECHNOLOGY & BIOINFORMATICS, Information technology < BIOTECHNOLOGY & BIOINFORMATICS, MEDICAL EDUCATION & TRAINING                                         |
|                                 |                                                                                                                                                                                    |

SCHOLARONE™  
Manuscripts

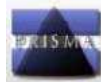

# PRISMA 2009 Checklist

| Section/topic                      | #  | Checklist item                                                                                                                                                                                                                                                                                              | Reported on page # |
|------------------------------------|----|-------------------------------------------------------------------------------------------------------------------------------------------------------------------------------------------------------------------------------------------------------------------------------------------------------------|--------------------|
| <b>TITLE</b>                       |    |                                                                                                                                                                                                                                                                                                             |                    |
| Title                              | 1  | Identify the report as a systematic review, meta-analysis, or both.                                                                                                                                                                                                                                         | 1                  |
| <b>ABSTRACT</b>                    |    |                                                                                                                                                                                                                                                                                                             |                    |
| Structured summary                 | 2  | Provide a structured summary including, as applicable: background; objectives; data sources; study eligibility criteria, participants, and interventions; study appraisal and synthesis methods; results; limitations; conclusions and implications of key findings; systematic review registration number. | 1                  |
| <b>INTRODUCTION</b>                |    |                                                                                                                                                                                                                                                                                                             |                    |
| Rationale                          | 3  | Describe the rationale for the review in the context of what is already known.                                                                                                                                                                                                                              | 2                  |
| Objectives                         | 4  | Provide an explicit statement of questions being addressed with reference to participants, interventions, comparisons, outcomes, and study design (PICOS).                                                                                                                                                  | 2                  |
| <b>METHODS</b>                     |    |                                                                                                                                                                                                                                                                                                             |                    |
| Protocol and registration          | 5  | Indicate if a review protocol exists, if and where it can be accessed (e.g., Web address), and, if available, provide registration information including registration number.                                                                                                                               | 22                 |
| Eligibility criteria               | 6  | Specify study characteristics (e.g., PICOS, length of follow-up) and report characteristics (e.g., years considered, language, publication status) used as criteria for eligibility, giving rationale.                                                                                                      | 3                  |
| Information sources                | 7  | Describe all information sources (e.g., databases with dates of coverage, contact with study authors to identify additional studies) in the search and date last searched.                                                                                                                                  | 3                  |
| Search                             | 8  | Present full electronic search strategy for at least one database, including any limits used, such that it could be repeated.                                                                                                                                                                               | 20                 |
| Study selection                    | 9  | State the process for selecting studies (i.e., screening, eligibility, included in systematic review, and, if applicable, included in the meta-analysis).                                                                                                                                                   | 3                  |
| Data collection process            | 10 | Describe method of data extraction from reports (e.g., piloted forms, independently, in duplicate) and any processes for obtaining and confirming data from investigators.                                                                                                                                  | 3                  |
| Data items                         | 11 | List and define all variables for which data were sought (e.g., PICOS, funding sources) and any assumptions and simplifications made.                                                                                                                                                                       | 4                  |
| Risk of bias in individual studies | 12 | Describe methods used for assessing risk of bias of individual studies (including specification of whether this was done at the study or outcome level), and how this information is to be used in any data synthesis.                                                                                      | 4                  |
| Summary measures                   | 13 | State the principal summary measures (e.g., risk ratio, difference in means).                                                                                                                                                                                                                               | 4                  |
| Synthesis of results               | 14 | Describe the methods of handling data and combining results of studies, if done, including measures of consistency (e.g., $I^2$ for each meta-analysis).                                                                                                                                                    | 4                  |

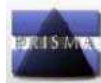

# PRISMA 2009 Checklist

Page 1 of 2

| Section/topic                 | #  | Checklist item                                                                                                                                                                                           | Reported on page # |
|-------------------------------|----|----------------------------------------------------------------------------------------------------------------------------------------------------------------------------------------------------------|--------------------|
| Risk of bias across studies   | 15 | Specify any assessment of risk of bias that may affect the cumulative evidence (e.g., publication bias, selective reporting within studies).                                                             | 4                  |
| Additional analyses           | 16 | Describe methods of additional analyses (e.g., sensitivity or subgroup analyses, meta-regression), if done, indicating which were pre-specified.                                                         | 4                  |
| <b>RESULTS</b>                |    |                                                                                                                                                                                                          |                    |
| Study selection               | 17 | Give numbers of studies screened, assessed for eligibility, and included in the review, with reasons for exclusions at each stage, ideally with a flow diagram.                                          | 5                  |
| Study characteristics         | 18 | For each study, present characteristics for which data were extracted (e.g., study size, PICOS, follow-up period) and provide the citations.                                                             | 7                  |
| Risk of bias within studies   | 19 | Present data on risk of bias of each study and, if available, any outcome level assessment (see item 12).                                                                                                | 7                  |
| Results of individual studies | 20 | For all outcomes considered (benefits or harms), present, for each study: (a) simple summary data for each intervention group (b) effect estimates and confidence intervals, ideally with a forest plot. | 7                  |
| Synthesis of results          | 21 | Present results of each meta-analysis done, including confidence intervals and measures of consistency.                                                                                                  | 8                  |
| Risk of bias across studies   | 22 | Present results of any assessment of risk of bias across studies (see Item 15).                                                                                                                          | 8                  |
| Additional analysis           | 23 | Give results of additional analyses, if done (e.g., sensitivity or subgroup analyses, meta-regression [see Item 16]).                                                                                    | 9                  |
| <b>DISCUSSION</b>             |    |                                                                                                                                                                                                          |                    |
| Summary of evidence           | 24 | Summarize the main findings including the strength of evidence for each main outcome; consider their relevance to key groups (e.g., healthcare providers, users, and policy makers).                     | 11                 |
| Limitations                   | 25 | Discuss limitations at study and outcome level (e.g., risk of bias), and at review-level (e.g., incomplete retrieval of identified research, reporting bias).                                            | 11                 |
| Conclusions                   | 26 | Provide a general interpretation of the results in the context of other evidence, and implications for future research.                                                                                  | 12                 |
| <b>FUNDING</b>                |    |                                                                                                                                                                                                          |                    |
| Funding                       | 27 | Describe sources of funding for the systematic review and other support (e.g., supply of data); role of funders for the systematic review.                                                               | 22                 |

From: Moher D, Liberati A, Tetzlaff J, Altman DG, The PRISMA Group (2009). Preferred Reporting Items for Systematic Reviews and Meta-Analyses: The PRISMA Statement. PLoS Med 6(6): e1000097. doi:10.1371/journal.pmed1000097

For more information, visit: [www.prisma-statement.org](http://www.prisma-statement.org).

Page 2 of 2

For peer review only - <http://bmjopen.bmj.com/site/about/guidelines.xhtml>

## IMPROVING THE UPTAKE OF SYSTEMATIC REVIEWS: A SYSTEMATIC REVIEW OF INTERVENTION EFFECTIVENESS AND RELEVANCE

Dr John Wallace, PhD reader, Dept of Continuing Education, Rewley House, Wellington Square, Oxford OX1 2JA, UK, john.wallace@wadh.oxon.org, Tel: 00353 682694883, Fax: 00353 906627271

Dr Charles Byrne, Dept of Psychiatry, Roscommon County Hospital, Roscommon, Ireland  
Professor Mike Clarke, Dept of Continuing Education, Rewley House, Wellington Square, Oxford, UK.

Key words: Evidence-based medicine, knowledge translation, quantitative research, qualitative research, mixed-methods research

Word count: 4,668

All authors were involved in the conceptualization, conduct, preparation, and writing up of the research. All authors made a substantial contribution to the design, acquisition, analysis and interpretation of data. All were involved in the drafting and revision of the article for intellectual content and all approved the final version.

### ABSTRACT

**Objective:** Little is known about the barriers, facilitators and interventions that impact on systematic review uptake. The objective of this study was to identify how uptake of systematic reviews can be improved.

**Selection criteria:** Studies were included if they addressed interventions enhancing the uptake of systematic reviews. Reports in any language were included. All decision makers were eligible. Studies could be randomised trials, cluster-randomised trials, controlled-clinical trials and before-and-after studies.

**Data sources:** We searched 19 databases including PubMed, Embase and The Cochrane Library, covering the full range of publication years from inception to December 2010. Two reviewers independently extracted data and assessed quality according to the Effective Practice and Organisation of Care criteria.

**Results:** Ten studies from 11 countries, containing 12 interventions met our criteria. Settings included a hospital, a government department and a medical school. Doctors, nurses, midwives, patients and programme managers were targeted. Six of the studies were geared to improving knowledge and attitudes while four targeted clinical practice.

**Synthesis of results:** Three studies of low-to-moderate risk of bias, identified interventions that showed a statistically significant improvement: educational visits, short summaries of systematic reviews, and targeted messaging. Promising interventions include e-learning, computer-based learning, inactive workshops, use of knowledge brokers, and an e-registry of reviews. Juxtaposing barriers and facilitators alongside the identified interventions, it was clear that the three effective approaches addressed a wide range of barriers and facilitators.

**Discussion:** A limited number of studies were found for inclusion. However, the extensive literature search is one of the strengths of this review.

Conclusion: Targeted messaging, educational visits, and summaries are recommended to enhance systematic review uptake. Identified promising approaches need to be developed further. New strategies are required to encompass neglected barriers and facilitators. This review addressed effectiveness and also appropriateness of knowledge uptake strategies.

## ARTICLE SUMMARY

### Article focus

What interventions improve the uptake of systematic reviews and meta-analyses?  
What barriers are overcome and what facilitators are built on by the various interventions?  
What interventions can be recommended and what strategies are promising for enhanced systematic review uptake?

### Key messages

Tailored messaging, educational visits and summaries are recommended to improve uptake of systematic reviews  
Interactive workshops, e-learning programmes and computer-based approaches are promising  
New strategies should be designed to address identified but neglected barriers and facilitators.

### Strengths and limitations

Strengths included an extensive search of 19 databases  
The review had added value by drawing on 27 barrier and 15 facilitator studies  
Both effectiveness and appropriateness are addressed  
However, just 10 intervention studies were detected

## INTRODUCTION

Although the importance of research evidence is largely unquestioned intellectually, medical practice often diverges from evidence-based recommendations. This denies patients the benefits of medical research.<sup>1</sup> Despite initiatives to improve the use of research findings, variation in the uptake of evidence exists.<sup>2</sup> The communication of clinically important research is hampered by the volume and geometric growth of the medical literature. Systematic reviews can address this problem and are a good way of taming the evidence.<sup>3</sup> A systematic review is a 'review of a clearly formulated question that uses systematic and explicit methods to identify, select and critically appraise relevant research, and to collect and analyse data from studies that are included in the review'.<sup>4</sup>

Evidence from systematic reviews however has not been widely adopted by healthcare professionals.<sup>5</sup> A review of physicians' information-seeking behaviour found that textbooks are the most frequently used source of information, followed by advice from colleagues.<sup>6</sup>

1  
2  
3 Systematic reviews were never cited as the source of research evidence when such evidence  
4 was used by policy makers and healthcare managers.<sup>7</sup> Research into interventions for  
5 enhancing the uptake of evidence by clinical practitioners and by policy makers indicate that  
6 further examination of the issue is warranted.<sup>8,9</sup>  
7

8  
9 The creation of systematic reviews without attention to their uptake is clearly a sterile  
10 exercise. Systematic reviews were the focus of this investigation, rather than the more  
11 commonly investigated clinical practice guidelines or individual, primary studies. Systematic  
12 reviews are based on primary research while clinical practice guidelines are an amalgam of  
13 clinical experience, expert opinion, patient preferences, and evidence. Systematic reviews are  
14 a scientific exercise aimed at generating new knowledge and they provide a summary of  
15 relevant primary research. In this way, they can help keep us current. Systematic reviews  
16 have a distinct development and scientific purpose that differs from both guidelines and  
17 primary research. Given the considerable differences between integrative reviews and clinical  
18 practice guidelines, we set out to identify factors enhancing the uptake specifically of  
19 systematic reviews and meta-analyses.  
20  
21  
22

23 The current authors had previously identified the barriers<sup>10</sup> and also the facilitators<sup>11</sup>  
24 impacting on systematic review uptake. Outcome studies of interventions that attempt to  
25 enhance systematic review uptake were now addressed. Importantly, a further synthesis was  
26 also carried out integrating the previously identified barriers and facilitators with the newly  
27 selected interventions detected in our systematic review. This study was needed in order to  
28 identify strategies that can be used to improve systematic review uptake. By drawing on our  
29 previous barrier and facilitator research, the appropriateness of these newly identified  
30 interventions can now also be estimated. This review has added value. Having assessed not  
31 just the effectiveness but also the relevance of the detected interventions, recommendations  
32 can now be made about the use of specific strategies to improve systematic review uptake.  
33  
34

35 There are challenges however to synthesizing such diverse evidence sources.<sup>12</sup> A hybrid  
36 approach was used here to address different but related elements of an overall review  
37 question.<sup>13</sup> Separate syntheses of intervention but also non-intervention studies, with an  
38 overall narrative commentary, are described.  
39  
40

41 The studies to be included in our review were diverse. For barriers and natural facilitators, the  
42 reports included surveys, focus groups, and interviews.<sup>10,11</sup> But intervention studies were also  
43 included in the final overarching synthesis. So results from qualitative studies were  
44 juxtaposed with results of randomized-controlled trials. Data was extracted from these  
45 disparate studies and a synthesis carried out.<sup>14</sup>  
46  
47

48 Attention to other vantage points that decision makers adopt when confronted with an  
49 innovation is important.<sup>15</sup> The aim here was to illuminate a complex area from different  
50 angles.<sup>16</sup> The objective was also to identify gaps in existing research evidence.<sup>17</sup> Narrative  
51 synthesis provided a summary of the current state of knowledge where recommendations  
52 could then be made for enhancing uptake of evidence from systematic reviews.<sup>13</sup>  
53  
54

## 55 **Method**

### 56 *Search strategy*

57  
58  
59  
60

1  
2  
3 We conducted a systematic review of the literature to identify interventions to enhance  
4 evidence uptake from systematic reviews, meta-analyses, and the databases containing them.  
5 The primary researcher (JW) searched 19 databases and used 3 search engines, for articles,  
6 not limited to the English language, and covering the full range of publication years available  
7 in each database up to Dec 2010 using a combination of index terms and text words derived  
8 from relevant articles previously identified.  
9

10  
11 The databases searched included the Cochrane Library, TRIP, Joanna Briggs Institute,  
12 National Guideline Clearing House, Health Evidence, PubMed (1950-Dec 2010), EMBASE  
13 (1980-Dec 2010), ERIC, CINAHL, PsycInfo, OpenSigle, Index to Theses in Great Britain  
14 and Ireland, and Conference Papers Index, Campbell Collaboration, Canadian Health  
15 Services Research Foundation, EPOC, KT+, McMaster University, Keenan Research Centre,  
16 and the New York Academy of Medicine. The search engines ALTA VISTA and Google  
17 Scholar were also utilised with a special emphasis on grey and knowledge translation  
18 literature. References from included primary studies and related review articles were scanned,  
19 experts in the field contacted, and bibliographies of textbooks were reviewed. A wide range  
20 of synonyms for uptake were combined with various terms for synthesis and systematic  
21 reviews. Uptake encompassed connectivity, awareness, familiarity, adoption, use, and  
22 healthcare outcomes.  
23

24  
25 We repeated parts of the search for the period January 2011 to January 2014 in order to  
26 identify any potentially relevant or on-going studies. We applied the same search strategies to  
27 PubMed and EMBASE, the two most productive databases in terms of studies identified for  
28 inclusion in the review. We also searched all active registers in the *meta*Register of controlled  
29 trials (<http://www.controlledtrials.com/mrct/>), in January 2014, for reports of relevant on-  
30 going or completed trials, to be listed under 'On-going studies' and 'Studies awaiting  
31 classification' that could be included in an update of this review.  
32  
33

#### 34 *Selection criteria*

35 Two review authors independently assessed studies for inclusion; discrepancies were  
36 resolved by discussion or by a third party. Studies with no clear relation to systematic review  
37 uptake were excluded. We included studies if they were an original collection of data. All  
38 decision makers, such as physicians, nurses, policy makers, patients and the public were  
39 encompassed. We did not restrict our search to the inclusion of studies reporting as their main  
40 objective the assessment of strategies aimed specifically to systematic review uptake. Studies  
41 with a range of aims were included. No study design or language was excluded. Studies were  
42 eligible if they addressed strategies to improve uptake of evidence that specifically came  
43 from systematic reviews, meta-analyses and the databases that contained them such as The  
44 Cochrane Library, The Cochrane Database of Systematic Reviews, Database of Abstracts of  
45 Reviews of Effects, Cochrane Pregnancy and Childbirth Database, Oxford Database of  
46 Perinatal Trials, and the Reproductive Health Library.  
47  
48

49  
50 Strategies to enhance uptake of policy briefs, position statements or clinical practice  
51 guidelines were excluded. Interventions could arise from within the research community or  
52 from within an organisation using systematic review evidence. Strategies could be single-  
53 stranded or multi-faceted, combining two or more interventions. The mode of delivery of the  
54 intervention could be print, electronic, audio/visual or face-to face. Any outcome measure of  
55 the utilisation of systematic review evidence informing health care decision making was  
56 considered. Self-reported use of evidence was included as well as outcome measures of actual  
57 use. Impact on clinician knowledge and behaviour, as well as patient-related outcomes, were  
58  
59  
60

1  
2  
3 used. We did not specify in our review that the interventions selected had to be tailored  
4 beforehand to specific barriers.  
5

6 Care was also taken to identify studies that produced multiple publications. When more than  
7 one report described a single study and each presented the same data, only the most recent  
8 publication was included. However, if more than one publication described a single study but  
9 each presented new and complementary data, both were included.  
10

#### 11 *Data collection and analysis*

12 Two reviewers (JW and CB) independently abstracted specific information from full-text  
13 studies according to standardized data extraction checklist items derived from Cochrane  
14 Effective Practice and Organisation of Care criteria checklists.<sup>18</sup> Discordances between the  
15 two reviewers were resolved by consensus. Two reviewers assessed the risk of bias of  
16 included studies using criteria described by EPOC. For all of the studies included in the  
17 review, we assigned an overall risk of bias rating such as high, moderate and low based on  
18 the standard criteria used in EPOC reviews.  
19  
20

21 Strategies with a non-significant, a negative effect or did not meet the study objectives,  
22 compared with the primary objective of the authors, were classified as “ineffective”; “mixed  
23 effects” was ascribed to studies that partially reached their objectives; and strategies with a  
24 significant, positive effect were classified as “effective”.<sup>19</sup> No meta-analysis was performed  
25 because of the high heterogeneity between the outcomes of each study.<sup>20</sup> Reviews of  
26 research-to-action strategies add up the number of positive and negative comparisons and  
27 conclude whether interventions were effective on that basis.<sup>21</sup>  
28  
29  
30

#### 31 *Assessment of risk of bias*

32 Two reviewers assessed the risk of bias of included studies using criteria described by EPOC.  
33 Given the potential heterogeneity of the targeted behaviours, skills, and organisational factors  
34 relevant to the review, this reviewer did not base study inclusion on a minimum cut-off for  
35 methodological quality. For all of the studies included in the review, this reviewer assigned  
36 an overall risk of bias rating such as high, moderate and low, based on the standard criteria  
37 used in EPOC reviews. We assigned a rating of low risk of bias if the first three criteria were  
38 scored as done and there were no concerns related to the last three criteria; moderate if one or  
39 two criteria were scored as not clear or not done; and high if more than two criteria were  
40 scored as not clear or not done.<sup>22</sup> Each criterion was noted “Done,” “Not clear,” or “Not  
41 done”. Only studies with a low to moderate risk of bias were used to draw conclusions about  
42 effectiveness of interventions to enhance uptake of reviews.  
43

#### 44 **Data synthesis**

45 There is a tendency for more recent systematic reviews to include a wider range of diverse  
46 study designs.<sup>23</sup> A broader focus is now advocated.<sup>15</sup> Research findings on barriers and  
47 facilitators impacting on review uptake can help in the development of potentially effective  
48 intervention strategies. The interventions can modify or remove barriers and use and build  
49 upon existing facilitators to enhance evidence uptake. Following formal identification of  
50 strategies to improve uptake of systematic reviews, these interventions were then juxtaposed  
51 with previously highlighted barriers and facilitators.  
52  
53

54 A framework for including different types of evidence in systematic reviews was used here.<sup>13</sup>  
55 This approach has been successfully applied elsewhere.<sup>24-27</sup> Using a mixed-methods  
56 approach, three types of analyses were performed. These included a synthesis of non-  
57 intervention studies, a synthesis of intervention outcome evaluations, and lastly a synthesis of  
58  
59  
60



the intervention and non-interventions studies together. For the last of these, a matrix was constructed which laid out the barriers and facilitators alongside descriptions of the interventions included in the in-depth systematic review of outcome evaluations. It was thus possible to see where barriers have been modified, or facilitators built upon, by relatively sound interventions. It was also possible to identify promising interventions that need further assessment.<sup>13</sup> Furthermore, it was practical to ascertain where factors had not been addressed by any approach, necessitating the development of new interventions.

The initial purpose of this review was to identify interventions that improve uptake of systematic reviews. The next objective was to ascertain whether the detected interventions addressed issues important to decision makers. This allowed a utilization of views on barriers and facilitators as a marker of the appropriateness of different interventions.<sup>13</sup>

## RESULTS

The results of the extensive search for studies addressing interventions that enhance uptake of systematic reviews are given in Figure 1.

**Figure 1. PRISMA Flow diagram**

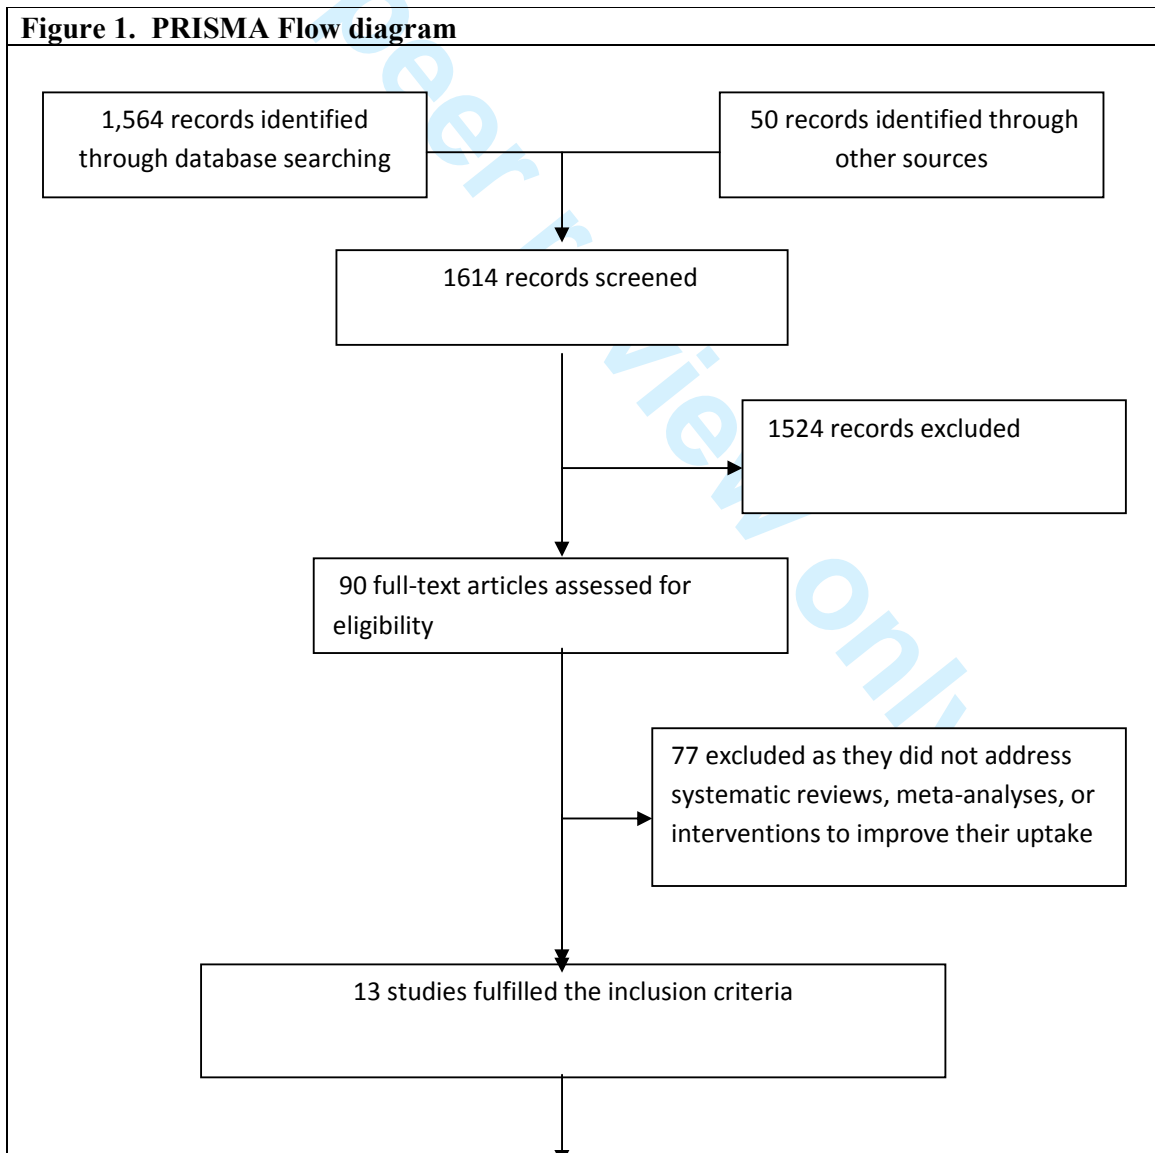

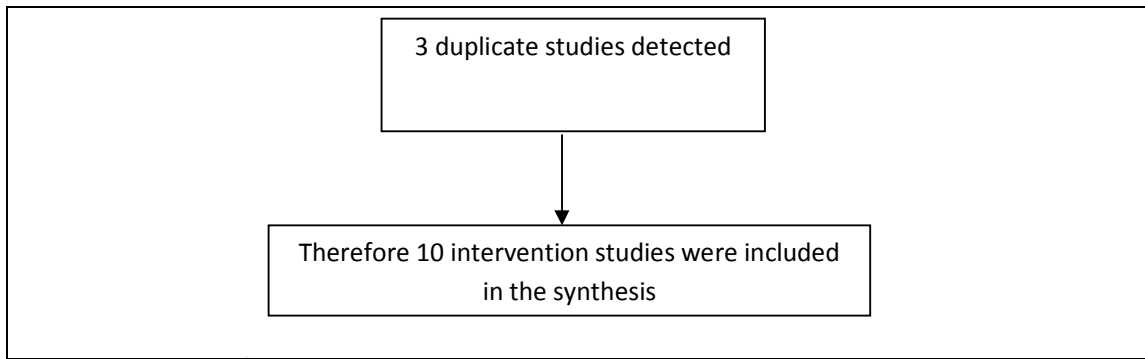

### Results of the search

Some 1,564 records were identified through database searching covering the full range of publication years available in each of the 19 database up to December 2010 and 50 records identified through other sources, such as bibliographies of related reviews and primary studies, textbooks and contact with authors. Of the total number of 1,614 titles and abstracts screened from all sources, including qualitative and grey literature searching, 1,524 records were excluded as not meeting inclusion criteria. Then 90 full-text articles were retrieved and assessed for eligibility. Some 62 studies were excluded as they did not address systematic reviews or meta-analysis, 3 were duplicate studies, and 15 studies were excluded and analysed separately as they addressed natural, non-intervention facilitators derived from surveys, focus groups and interviews.<sup>11</sup> Ten intervention studies were then included and form the substrate for this review (Table 1).

A further search of EMBASE and PubMed from Jan 2011 to January 2014 yielded 248 and 387 records respectively but failed to identify any further relevant studies. The *metaRegister* of controlled trials was also searched in January 2014 and no study was identified for inclusion in 'Studies awaiting classification' or 'On-going studies'. An example of the search strategy is given in Table 2.

### Included studies

Of the ten included intervention studies, this researcher counted 5 randomised controlled trials, 3 cluster randomised controlled trials, 1 controlled clinical trial, and 1 before-after study.<sup>28-37</sup> There were 8 two-arm trials, 1 single-arm trial and 1 three-armed trial. The unit of allocation was the health professional, such as a doctor, in 3 studies, the patient in 1 report, and a larger grouping such as the hospital or geographical location in 6 studies.

#### *Settings and characteristics of professionals*

The nature of the desired change, professionals targeted, and the settings, differed from one intervention study to the next. Four studies were undertaken in the UK, 1 each in Australia, USA and Canada while 1 study was conducted across five countries: Germany, Hungary, Spain, Switzerland and the UK. The remaining 2 studies were carried out in the Netherlands and the UK, and in Mexico and Thailand, respectively. The studies were conducted in 11 countries in total.

Eight of the intervention studies took place in a hospital setting while the remaining two investigations were conducted in a government department and a medical school. In 6 of the studies, the professionals included doctors of different sub-specialities and at varying stages of training. Two studies dealt with obstetricians, 1 study included psychiatrists, another GPs, and 2 studies involved Interns (Foundation year). Three reports included nurses or mid-

wives, one targeted patients as participants exclusively, while another looked at programme managers.

#### *Prospective identification of barriers to change*

None of the 10 studies tailored the intervention to prospectively identified barriers to uptake of evidence from systematic reviews or meta-analyses.

#### *Theoretical underpinning*

Eight studies identified a theoretical underpinning to their choice of intervention. One study included a costing for their intervention to improve uptake of evidence from systematic reviews.<sup>28</sup>

#### *Characteristics of interventions*

Among these reports, interventions included clinically integrated e-learning courses (3/10), educational visits (2/10), a computer-based (CD-ROM) session focusing on critical appraisal of systematic reviews (2/10), brief summaries of systematic reviews (1/10), a manual of Cochrane reviews (1/10), and access to an online registry, tailored messaging and use of knowledge brokers (1/10). Descriptions of the strategies are outlined in Table 1. One study investigated three interventions.<sup>33</sup>

#### *Risk of bias in included studies*

Of the 10 included studies, 8 had addressed allocation concealment. Follow-up of professionals was carried out adequately in 6 studies. Blinded assessment of the primary outcome was carried out in 9 studies. Baseline measurement was conducted adequately in 5 studies. A reliable primary outcome measure was reported in all 10 studies. Protection against contamination was assessed by us as adequate in 7 studies. Regarding the overall risk of bias, 2 studies were assessed as being at high risk,<sup>34,35</sup> two at low risk of bias,<sup>28,32</sup> while 6 studies were regarded as being of moderate risk of bias.<sup>29,30,31,33,36,37</sup>

#### *Outcomes*

Use of correct outcome measures in this area is of considerable importance.<sup>38</sup> Six studies were concerned with changing knowledge and attitudes (Table 3). One report analysed both knowledge and decision-maker behaviour<sup>30</sup> while another<sup>31</sup> addressed practice and quality of life. Two studies analysed specific practice change.<sup>28,33</sup>

Three studies, of low-to-moderate risk of bias, showed a statistically significant improvement on some relevant outcome. These interventions included educational visits<sup>28</sup>, short summaries of systematic reviews<sup>29</sup>, and targeted messaging.<sup>33</sup>

Other interventions such as interactive workshops produced ‘substantial’ benefits.<sup>30</sup> Clinically integrated e-learning courses and a computer-based series of teaching sessions brought about some knowledge and attitude gain from baseline (Table 1).

#### **Synthesis of barrier, facilitator and intervention studies**

Having identified ten reports meeting our criteria as intervention outcome studies, we then went on to juxtapose these interventions with the barrier and facilitator studies identified in two systematic reviews previously conducted by the authors.<sup>10,11</sup>

Figure 2 outlines the number of studies included at various stages of this second, overarching review. Systematic and exhaustive searches identified 3,329 citations in total. Retrieval,

screening, and classification of full reports had previously resulted in the identification of 27 studies addressing barriers and 15 studies that included facilitators.<sup>10,11</sup> These were now joined by the 10 studies evaluating interventions to enhance systematic review uptake.<sup>28-37</sup> Use of multiple data sources can enhance the credibility of findings.<sup>39</sup> Intervention study characteristics were included in Table 1 while barrier and facilitator study characteristics were described previously.<sup>10,11</sup> The synthesis of these barrier, facilitator, and intervention studies is outlined in Table 3.

**Figure 2. An overview of all stages of the review and the approach taken**

|                                                                                                                                                                                                                                                                                                                                                                                                                                                                      |                                                                                                                                                                                                                         |
|----------------------------------------------------------------------------------------------------------------------------------------------------------------------------------------------------------------------------------------------------------------------------------------------------------------------------------------------------------------------------------------------------------------------------------------------------------------------|-------------------------------------------------------------------------------------------------------------------------------------------------------------------------------------------------------------------------|
| <b>Review question</b>                                                                                                                                                                                                                                                                                                                                                                                                                                               |                                                                                                                                                                                                                         |
| ‘What is known about the barriers, facilitators, and interventions impacting on uptake of systematic reviews?’                                                                                                                                                                                                                                                                                                                                                       |                                                                                                                                                                                                                         |
| <b>Stage 1: Mapping and quality screening exercise</b>                                                                                                                                                                                                                                                                                                                                                                                                               |                                                                                                                                                                                                                         |
| Systematic and exhaustive searches identified 3,329 citations. Studies were included if they addressed barriers and facilitators to uptake of evidence specifically from systematic reviews, meta-analyses and the databases that contained them. Retrieval, screening, and classification of full reports resulted in the identification of 27 studies addressing barriers, 15 studies that included natural facilitators, and 10 studies evaluating interventions. |                                                                                                                                                                                                                         |
| <b>Non-intervention studies</b>                                                                                                                                                                                                                                                                                                                                                                                                                                      | <b>Intervention studies</b>                                                                                                                                                                                             |
| Studies of decision makers’ views                                                                                                                                                                                                                                                                                                                                                                                                                                    | Rigorous evaluation studies of interventions<br>Focus on addressing impact on knowledge, attitude, behaviour and practice                                                                                               |
| <b>Stage 2: in-depth review</b>                                                                                                                                                                                                                                                                                                                                                                                                                                      |                                                                                                                                                                                                                         |
| Synthesis across study types to answer sub-question:                                                                                                                                                                                                                                                                                                                                                                                                                 |                                                                                                                                                                                                                         |
| ‘To what extent do interventions overcome the barriers identified by decision makers and build upon the facilitators to uptake of evidence from systematic reviews?’                                                                                                                                                                                                                                                                                                 |                                                                                                                                                                                                                         |
| <b>Non-intervention (views) studies</b>                                                                                                                                                                                                                                                                                                                                                                                                                              | <b>Intervention studies (outcome evaluations)</b>                                                                                                                                                                       |
| Application of inclusion criteria resulted in 27 studies addressing barriers and 15 identifying facilitators.<br>Data extracted for description of characteristics and quality<br>Findings extracted<br>Findings synthesised to answer                                                                                                                                                                                                                               | Application of inclusion criteria resulted in 10 outcome studies<br>Data extracted for description of characteristics and quality<br>Findings extracted<br>Eight out of 10 studies were of low-to-moderate risk of bias |

|                                                                                   |                                                                                                          |
|-----------------------------------------------------------------------------------|----------------------------------------------------------------------------------------------------------|
| sub-question: 'What are the views on uptake of evidence from systematic reviews?' | Findings synthesised to answer: 'What are the effects of interventions on uptake of systematic reviews?' |
|-----------------------------------------------------------------------------------|----------------------------------------------------------------------------------------------------------|

### Decision maker's views

Research indicates that the perceived barriers to the use of evidence from systematic reviews tend to vary.<sup>10</sup> The most commonly investigated barriers were lack of use, lack of awareness, lack of access, lack of familiarity, lack of perceived usefulness, lack of motivation, and external barriers related to the format and content of reviews and a prevailing negative organisational culture.

Perceived facilitators to the use of evidence from systematic reviews are also diverse.<sup>11</sup> The five most commonly reported facilitators to uptake of evidence from systematic reviews were: the perception of systematic reviews as having multiple uses; a content that included benefits, harms and costs; a format with graded access and executive summary; training in use, and peer-group support.

### Synthesis

Table 3 shows the synthesis matrix which juxtaposes barriers and facilitators alongside the results of outcome evaluations. There were some matches but also significant gaps between what decision makers see as helpful to evidence uptake from systematic reviews and, on the other hand, soundly evaluated interventions that addressed both facilitators and barriers.

Three interventions, of low-to-moderate risk of bias, had statistically significant results on at least one outcome measure. These strategies included targeted messaging, educational visits, and summaries of systematic reviews.

Tailored, targeted messaging addressed the specific barriers of limited access to, awareness of, and familiarity with systematic reviews. Targeted messaging also built on enhancers of uptake such as increased choice of format, with web-based delivery and an overall improved access. A graded format takes into account the disparate information needs of various disciplines at different positions in an organisation. It addresses the concern that one size does not fit all.

Educational visits overcame and built on a wide range of factors. Knowledge barriers such as lack of access, lack of awareness and familiarity; attitudinal barriers such as limited motivation, perceived lack of usefulness and relevance; and external barriers such as an adverse organisational climate, were impacted on by this complex intervention. Increased access and training were among the facilitators of uptake of systematic reviews built on by this approach that also took into account the information needs of the target audience and their level of training.

Brief summaries of systematic reviews overcame the knowledge barriers of lack of access, lack of awareness and familiarity; attitudinal barriers of perceived lack of usefulness and relevance; and the external barrier of systematic reviews usually having a standard format for

1  
2  
3 all readers, regardless of their level of training. Brief summaries facilitated the uptake of  
4 evidence from systematic reviews by providing a one-page, web-based, useful synopsis that  
5 took into account the information needs and time demands of the target audience.  
6

7  
8 A number of other promising interventions, not achieving statistically significant results, also  
9 overcame important barriers and built on a number of facilitators. A multifaceted educational  
10 intervention addressed a wide range of knowledge, attitude, and external barriers, and also  
11 built on facilitators to produce substantial but non-significant knowledge and attitudinal  
12 gains.<sup>30</sup> A patient manual addressed similar barriers and facilitators as did the brief  
13 summaries of systematic reviews.<sup>31</sup>  
14

15 A further three studies using e-learning, addressed a similar number of barriers and  
16 facilitators.<sup>32,34,35</sup> Each of the two computer-based interventions addressed the same factors in  
17 terms of number and content and brought about some non-significant, improvement between  
18 pre- and post-assessment.<sup>36,37</sup>  
19

20  
21 A number of issues were identified that had not been addressed by the effective or promising  
22 interventions. These were mainly facilitators and included building on the time-saving aspect  
23 of systematic reviews, their perceived ease of use, their importance relative to other sources  
24 of information, and their ability to improve confidence. The added value of logos and the  
25 advantages of consistent presentation were not utilised as often as they might have been.  
26

## 27 Discussion

28 This study systematically identified interventions that enhance the uptake of evidence from  
29 systematic reviews. A second overarching review also illustrated the extent to which the  
30 interventions addressed barriers and facilitators impacting on systematic review uptake.  
31

32  
33 The evidence for the effectiveness of interventions to improve systematic review uptake is  
34 mixed. Three interventions, of low-to-moderate risk of bias, had a statistically significant  
35 advantage over a comparison on at least one outcome measure. These interventions included  
36 educational visits, short summaries of systematic reviews, and targeted messaging. Other  
37 interventions such as interactive workshops produced 'substantial' benefits, while clinically  
38 integrated e-learning courses and computer-based series of teaching sessions brought about  
39 some knowledge or attitude gain from baseline. No study demonstrated a significant impact  
40 directly on patient care.  
41

42  
43 Unlike other reviews, this study adopted a wider perspective through inclusion of studies of  
44 decision maker's views as well as outcome effectiveness studies. Taking account of a  
45 decision maker's preferences and abilities is important.<sup>39</sup> Juxtaposing perceived barriers and  
46 facilitators alongside effectiveness studies allowed us to examine the extent to which the  
47 needs of decision makers had been adequately addressed by the evaluated interventions. To  
48 some extent they had. Lack of access, awareness, and familiarity were frequently overcome  
49 as barriers. However, fewer of the identified facilitators appear to have been built on by the  
50 interventions.  
51

52  
53 We recommend 3 interventions: tailored, targeted messaging, systematic review summaries,  
54 and educational visits. These address a range of factors impacting on review uptake. Some  
55 approaches however require additional work before they can be recommended for practice.<sup>40</sup>  
56 Interventions such as e-learning, computer-based learning, multifaceted educational  
57  
58  
59  
60

1  
2  
3 interventions, an on-line registry and the use of a knowledge broker are strategies that need to  
4 be developed further.

5  
6 Many of the gaps in the evidence about uptake of systematic reviews tended to be in relation  
7 to building on identified facilitators. Despite a wide search, we found few evaluations of  
8 strategies that emphasized the time-saving aspect of systematic reviews, their importance  
9 relative to other sources of information and their ability to improve self-confidence in using  
10 evidence. New interventions need to be developed that build on these enhancers of uptake.

11  
12  
13 A surprising finding was that, despite the wider range of barriers and facilitators addressed by  
14 use of a knowledge broker, this intervention was not as effective as targeted, tailored  
15 messaging.<sup>33</sup> The more complex intervention was not more effective. That targeted, tailored  
16 messaging overcame and built on a smaller number of barriers and facilitators suggests that it  
17 is not the number of factors addressed that is central but their relevance and intensity.

### 18 19 *Limitations*

20 A frequent disappointment in the conduct of systematic reviews is the relative paucity of  
21 published primary studies on which to base the review.<sup>41</sup> We found just 10 intervention  
22 studies in all, with 8 of these of moderate-to-low risk of bias. Identification of published  
23 studies on evidence uptake is difficult because they are poorly indexed and scattered across  
24 generalist and specialist journals. Some publications may have been missed, though an  
25 extensive search was conducted using over 19 databases. Furthermore, reporting was  
26 sometimes incomplete so that data extraction was problematic.<sup>42</sup>

27  
28  
29 Important methodological limitations and inconsistencies among the studies identified make  
30 it extremely difficult, currently, to justify policy action taken on the basis of evidence alone.<sup>20</sup>  
31 The limitations of our review largely reflect the limitations of the literature reviewed.  
32 Undertaking reviews in this area is difficult because of the complexity inherent in the  
33 interventions, the variability of the methods used, and the difficulty of generalising findings  
34 across healthcare settings.

35  
36  
37 The impact of the interventions was not consistent across users, settings, or behaviours.  
38 Positive studies had just one or two of many outcome measures that yielded a significant  
39 result. Some studies presented a positive trend, others statistically significant outcomes.  
40 Certain interventions appeared to improve knowledge and attitudes, and to a lesser extent,  
41 performance. None were shown to impact on patient outcomes. This issue of patient-centred  
42 outcomes is likely to become more prominent in the coming years.<sup>15</sup> Although the current  
43 evidence base is incomplete, this synthesis does however provide valuable insights into the  
44 likely effectiveness of different interventions.

### 45 46 47 *Implications for research*

48 We need to standardize reporting of trials of interventions to improve professional  
49 performance. A broad framework should be developed for designing and selecting  
50 appropriate interventions across a wide range of professional activities in which gaps between  
51 evidence and practice are found.<sup>43</sup> Both clinical practice and also more patient outcome data  
52 are required.

53  
54  
55 Barriers and facilitators can be used as starting point for intervention relevance.<sup>13</sup> This review  
56 can be considered a resource. The conclusions suggest recommendations for a research  
57  
58  
59  
60

1  
2  
3 agenda based on appropriate and feasible interventions that could be evaluated for their  
4 effectiveness.

5  
6 Barriers and facilitators that were not addressed adequately in any of the intervention  
7 evaluations led us to draw conclusions about opportunities for new interventions and their  
8 subsequent evaluation. We have noted that several barriers to, and facilitators of, uptake of  
9 systematic reviews have received little attention. Reviews are perceived as having a limited  
10 range, a narrow focus, are poorly promoted and not updated frequently enough.<sup>10</sup> The  
11 medico-legal relevance of systematic reviews has not been highlighted sufficiently. Further  
12 work is needed to develop and evaluate interventions which modify or remove identified  
13 barriers and build on highlighted facilitators.

### 14 15 16 *Implications for practice*

17 This framework allows reviewers to address some of the criticisms of systematic reviews of  
18 controlled trials by taking into account the social and structural influences on their uptake.<sup>13</sup>  
19 It is important to carefully select the intervention most likely to be effective in the light of the  
20 diagnosed problem.<sup>44</sup> Choosing the right strategy is an essential component of developing  
21 evidence-based practice and ultimately improving patient care.<sup>45</sup> We need to focus more on  
22 impacting on patient satisfaction and quality of life.<sup>46</sup> Clinically integrated interventions are  
23 also required.<sup>47</sup>

24  
25  
26 Presentation is as important as results. Little attention has been paid to the format of a  
27 review.<sup>5</sup> The reviews are often technical, contain complex statistics, and are written in an  
28 academic style. The evidence suggests that systematic reviews should be presented in an  
29 easily understood way with information accessed in a graded manner. The identification of a  
30 take-home message is important.

31  
32  
33 The aim here was to place the different interventions in perspective.<sup>48</sup> It is important to  
34 consider the target audience, their values and preferences while linking the key message to  
35 the level of the decision maker's training. We should refocus efforts on improving and  
36 promoting graded access to summaries of evidence.

### 37 38 39 **CONCLUSION**

40 We recommend 3 interventions: tailored, targeted messaging, systematic review summaries,  
41 and educational visits. These address a range of identified factors impacting on review  
42 uptake. Other interventions, such as e-learning approaches, need to be developed further.  
43 New interventions need to be devised that build on neglected facilitators of uptake.

44  
45  
46 This review has added value compared with conventional reviews of effectiveness.<sup>13</sup> The  
47 advantage lies in the ability to examine systematically a much wider literature so to suggest  
48 recommendations for practice. A conventional review of effectiveness in this area would  
49 have been able to draw on a 10 outcome evaluation reports to generate conclusions about  
50 effectiveness. We were able to draw on an additional 27 studies encompassing decision  
51 maker's views about barriers and 15 studies targeting facilitators.

52  
53  
54 We addressed not just effectiveness but also appropriateness. The approach utilized a larger  
55 proportion of research evidence relevant to the review question. The evidence synthesized  
56 here is important to a broad sweep of institutions concerned with evidence uptake in general  
57 and systematic review uptake in particular.



**Conflict of interest: None**

There was no known conflict of interest related to or unrelated to the research.

All authors have completed the Unified Competing Interest form and declare: no support from any organisation for the submitted work, no financial relationships with any organisations that might have an interest in the submitted work in the previous three years, no other relationships or activities that could appear to have influenced the submitted work.

Additional information, including the protocol, examples of the search strategy, and risk of bias tables for each individual study and bias across groups, is available from the corresponding author at [john.wallace@wadh.oxon.org](mailto:john.wallace@wadh.oxon.org)

The authors are happy to share data.

All authors were involved in the conceptualization, conduct, preparation, and writing up of the research. All authors made a substantial contribution to the design, acquisition, analysis and interpretation of data. All were involved in the drafting and revision of the article for intellectual content and all approved the final version.

No ethical approval was required.

No funding was received or sought.

**REFERENCES**

1. INNVAER, S., VIST, G., TROMMALD, M., OXMAN, A. Health policy-makers' perceptions of their use of evidence: a systematic review. *Journal of Health Services Research & Policy*, 2002; 7 (4):239–244.
2. MURTHY, L., SHEPPERD, S., CLARKE, M. J., GARNER, S. E., LAVIS, J. N., PERRIER, L., ROBERTS, N. W. & STRAUS, S. E. Interventions to improve the use of systematic reviews in decision-making by health system managers, policy makers and clinicians. *Cochrane Database Syst Rev*, 2012. 9,CD009401.
3. KNOTTNERUS, J. A. and TUGWELL, P. 'The evidence base of taming continuously proliferating evidence', *Journal of Clinical Epidemiology*, 2012. 65(12), 1241-1242.
4. SACKETT, D, ROSENBERG, WC., MUIR GRAY, JA. HAYNES, R. B., and RICHARDSON, W.S. Evidence based medicine: what it is and what it isn't. *BMJ*, 1996; 312:71.

- 1  
2  
3 5. TETZLAFF, J. TRICCO, A. and MOHER, D. Knowledge Synthesis. In Straus S, Tetroe  
4 J, Graham I D, editors. *Knowledge translation in health care*. UK: Wiley-Blackwell, BMJ  
5 Books; 2009.
- 6  
7 6. DAWES, M., SAMPSON, U. Knowledge management in clinical practice: a systematic  
8 review of information seeking behavior in physicians. *Int J Med Infor* 2003 Aug; 71(1):9-  
9 15.
- 10  
11 7. LAVIS, J., DAVIES, H., OXMAN, A., DENIS, J.L., GOLDEN-BIDDLE K, and  
12 FERLIE, E. Toward systematic reviews that inform health care management. *Journal of*  
13 *Health Services Research & Policy*. 2005; 10 Suppl 1: 35–48.
- 14  
15 8. PERRIER, L., MRKLAS, K., LAVIS, J. N. and STRAUS, S. E. Interventions  
16 encouraging the use of systematic reviews by health policymakers and managers: A  
17 systematic review. *Implement Sci*, 2011. 6, 43.
- 18  
19 9. PERRIER, L., MRKLAS, K., SHEPPERD, S., DOBBINS, M., MCKIBBON, K. A. and  
20 STRAUS, S. E. Interventions encouraging the use of systematic reviews in clinical  
21 decision-making: a systematic review. *J Gen Intern Med*, 2011. 26(4), 419-26.
- 22  
23 10. WALLACE, J., NWOSA, B., CLARKE, .J. Barriers to the uptake of evidence from  
24 systematic reviews and meta-analyses: a systematic review of decision makers'  
25 perceptions. *BMJ Open*. 2012;2:e001220 doi: 10. 1136/bmjopen-2012-001220
- 26  
27 11. WALLACE, J, BYRNE, C., CLARKE, M. Making evidence more wanted; a systematic  
28 review of facilitators to enhance the uptake of evidence from systematic reviews and  
29 meta-analyses. *Internal J Evid Based Healthcare*. 2012. 10 (4): 338-46 doi:  
30 10.1111/j.1744-1609.2012.00288.x
- 31  
32 12. POPE, C., MAYS, N., POPAY J. Synthesizing Qualitative and Quantitative Research.  
33 UK: McGraw-Hill; 2007.
- 34  
35 13. OLIVER, S, HARDEN, A, REES, R., SHEPHARD, J., BRUNTON, G., GARCIA, J., et  
36 al. An emerging framework for including different types of evidence in systematic  
37 reviews for public policy. *Evaluation*. 2005;11(4): 428-446.
- 38  
39 14. NOYES, J., POPAY, J., PEARSON, A., HANNES, K. and BOOTH, A. Qualitative  
40 Research and Cochrane Reviews, in Higgins J P and Green S, editors. *Cochrane*  
41 *Handbook for Systematic Reviews of Interventions*. Chichester, UK: John Wiley & Sons;  
42 2008.
- 43  
44 15. GARTLEHER, G. AND FLAMM, M. Is The Cochrane Collaboration prepared for the era  
45 of patient-centred outcomes research? *Cochrane Database Syst Rev*, 2013. 3, ED000054
- 46  
47 16. WONG, G. GREENHALGH T, WESTTHORP PG, BUCKINGHAM J. RAMESES  
48 Publication Standards: Meta-Narrative Review. *BMC Medicine*. 2013 11, 20. DOI.  
49 10.1186/1741-7015-11-20.
- 50  
51  
52  
53  
54  
55  
56  
57  
58  
59  
60

17. SHEPHERD, J., HARDEN, A., REES, R., BRUNTON, G., GARCIA, J., OLIVER, S., OAKLEY, A. Young people and healthy eating: a systematic reviews on research on barriers and facilitators. *Health Education Research*. 2005 26 Oct; 21:239-257.
18. Cochrane Effective Practice and Organisation of Care Group: Data Collection Checklist. EPOC resources for review authors Revised 2002:<http://www.epoc.cochrane.org/en/handsearchers.html>
19. CHAILLET, N., DUBE, E., DUGAS, M., AUDIBERT, F., TOURIGNY, C., FRAZER, W. D. and DUMONT, A. Evidence-based strategies for implementing guidelines in obstetrics: a systematic review. *Obstet Gynecol*, 2006. 108(5), 1234-45.
20. JOLY, A., NGUENG FEZE, I. and SIMARD, J. Genetic discrimination and life insurance: a systematic review, *BMC Medicine*, 2013 11:25
21. GROL, R. and GRIMSHAW, J. From best evidence to best practice: effective implementation of change in patients' care. *Lancet*, 2003, 362(9391), 1225-30.
22. BAKER, R., CAMOSSO-STEFINOVIC, J., GILLIES, C., SHAW, EJ, CHEATER, J, FLOTTORP, S, ROBERTSON, N. Tailored interventions to overcome identified barriers to change: effects on professional practice and health care outcomes. *Cochrane Database of Systematic Reviews*. 2010, Issue 3. Art. No.: CD005470. DOI: 10.1002/14651858.CD005470.pub2
23. ANGLIN, R. E., SAMAAAN, Z., WALTER, S. D. and MCcDONALD, S. D. Vitamin D deficiency and depression in adults: systematic review and meta-analysis. *Br J Psychiatry*, 2013 202, 100-7.
24. THOMAS, J., HARDEN, A., OAKLEY, A, OLIVER, S., SUTCLIFFE, R., REES, R., BRUNTON, G., KAVANAGH, J. Integrating qualitative research with trials in systematic reviews. *BMJ*, 2004; 328:1010.
25. BRUNTON, G., HARDEN, A., REES, R, KAVANAGH, J, OLIVER, S, OAKLEY, A. Children and Physical Activity: A Systematic Review of Barriers and Facilitators. London: EPPI-Centre, Social Science Research Unit, Institute of Education, University of London: 2003.
26. REES, R., Harden J, Shepherd G, Brunton S, Oliver, Oakley A. Young people and physical activity: a systematic review of barriers and facilitators. London:EPPI-Centre, Social Science Research Centre: 2001.
27. HARDEN, A., REES, J., SHEPHERD, G., BRUNTON, S., OLIVER, S., Oakley A. Young people and mental health: a systematic reviews of barriers and facilitators. London:EPPI-Centre, Social Science Research Centre: 2001.
28. WYATT, J., PATERSON-BROWN, S., JOHANSON, R., ALTAMN, D, BRADBURN, M., FISK, N. Randomized trial of educational visits to enhance use of systematic reviews in 25 obstetric units. *BMJ*. 1998; 317:1041-6.

- 1  
2  
3  
4 29. OERMANN, M., ROOP, J., NORDSTROM, C., GALVIN, E., FLOYD, J. Effectiveness  
5 of an intervention for disseminating Cochrane reviews to nurses. *MEDSURG Nursing*,  
6 2007 Dec; 16:6.  
7  
8  
9 30. GULMEZOGLU, AM, LNAGER, A., PIAGGO, G., LUMBIGANON P, VILLAR, J.,  
10 GRIMSHAW, J. Cluster randomised trial of an active multi-faceted educational  
11 intervention based on the WHO Reproductive Health Library to improve obstetric  
12 practices. *BJOG*, 2007; 114:16-23.  
13  
14 31. HARRIS, M., SMITH, B J, VEALE, A., ESTERMANN, A F, SELIM, P. Treatments: a  
15 controlled trial of outcomes. Providing patients with reviews of evidence about COPD.  
16 *Chronic Respiratory Disease*. 2006; 3:133.  
17  
18 32. KULIER, R., COPPUS. S., ZAMORA, J., HADLEY, J., MALICK, S., DAS, K.,  
19 WEINBRENNER, S., MEYERROSE, B., et al. The effectiveness of a clinically  
20 integrated e-learning course in evidence-based medicine: A cluster randomised controlled  
21 trial. *BMC Medical Education*. 2009; 9:21.  
22  
23  
24 33. DOBBINS, M., HANNA, S., CILISKA, D., MANSKE, S., CAMERON, R., MERCER,  
25 S. O'MARA, L., DECORBY, K., ROBESON, P. A randomized controlled trial evaluating  
26 the impact of knowledge translation and exchange strategies. *Implementation Science*.  
27 2009; 4:61.  
28  
29  
30 34. KULIER, R., HADLEY, J., WEINBRENNER, S., MEYERROSE, B., DECSI, T.,  
31 HORVATH, A., et al. Harmonising Evidence-based medicine teaching: a study of the  
32 outcomes of e-learning in five European countries. *BMC Medical Education*. 2008; 8:27.  
33  
34 35. HADLEY, J., KULIER, R., ZAMORA, J., COPPIUS, S., WEINBRENNER, S.,  
35 MEYERROSE, B. Effectiveness of an e-learning course in evidence-based medicine for  
36 foundation (internship) training. *J R Soc Med*. 2010 July 1; 103(7):288–294.  
37  
38  
39  
40 36. DAVIS, J., CRABB, S., ROGER, E., ZAMORA, J., KHAN, K. Computer-based teaching  
41 is as good as face to face lecture-based teaching of evidence based medicine: a  
42 randomized controlled trial. *Medical teacher*. 2008;30:302-307.  
43  
44 37. DAVIS, J, CHYSSAFIDOU, E., ZAMORA J, DAVIES, D, KHAN, K. Coomarasamy A.  
45 Computer-based teaching is as good as face to face lecture-based teaching of evidence  
46 based medicine: a randomised controlled trial. *BMC Med Educ*. 2007; 7:23.  
47  
48  
49 38. BURTON, L. J., TYSON, S. and MCGOVERN, A. Staff perceptions of using outcome  
50 measures in stroke rehabilitation. *Disabil Rehabil*. 2013, 35, 828-34.  
51  
52  
53 39. LAWRENCE V, FOSSEY J, BALLARD C, MONIZ-COOK E, MURRAY J. Improving  
54 quality of life for people with dementia: making psycho-social interventions work. *BJP*.  
55 2012. 201:344-351.  
56  
57  
58  
59  
60

- 1  
2  
3 40. VAN OORT, L., VAN DEN BERG, T., KOES, B. W., DE VET, R. H., ANEMA, H. J.,  
4 HEYMANS, M. W. & VERHAGEN, A. P. Preliminary state of development of  
5 prediction models for primary care physical therapy: a systematic review. *J Clin*  
6 *Epidemiol*, 2012. 65, 1257-66.  
7  
8  
9 41. MATSON, J. Narrative overview of systematic reviews and meta-analyses: evidence on  
10 many treatments for psychopathology in people with developmental disabilities is  
11 limited. *Evid Based Ment Health*, 2013.16, 44.  
12  
13 42. STEWART, C. G., OMAR, O., MILENSU, S. & LY-MEE, Y. A systematic review finds  
14 that prediction models for chronic kidney were poorly reported and often developed using  
15 inappropriate methods. *Journal of clinical epidemiology*, 2013. In press.  
16  
17 43. OXMAN, D., THOMSON, MA, DAVIS, D, HAYNES B. No magic bullets: a systematic  
18 review of 102 trials of interventions to improve professional practice. *Can Med Assoc.*  
19 1995 Nov 15; 153(10):1423-1431.  
20  
21 44. EASTMAN, G., O'CONNELL, B., and GARDNER, A. Selecting the right integration of  
22 research into practice strategy. *J Nurs Care Qual.* 2008; 23(2):258-264.  
23  
24 45. NABULSI, M., HARRIS, J., LETELIER, L., RAMOS K, HOPAYIAN, K., PARKIN, C,  
25 PORZSOLT, F., SESTINI, P., Et al. Effectiveness of education in evidence-based  
26 healthcare: the current state of outcome assessments and a framework for future  
27 developments. *International Journal of Evidence-based Healthcare.* 2007 Dec, 5(4):468-  
28 476.  
29  
30 46. COOMARY, A., KHAN, K. What is the evidence that postgraduate teaching in evidence  
31 based medicine changes anything? A systematic review. *BMJ* 2004 Oct. 329:1017.  
32  
33 47. MCCOLL, A., SMITH, H., WHITE, P. and FIELD, J. General practitioner's perceptions  
34 of the route to evidence based medicine: a questionnaire survey. *BMJ* 1998 316(7128),  
35 361-5.  
36  
37 48. LEUCHT, S., HIERL, S., KISSLING, W., DOLD, M. and DAVIS, J. M. Putting the  
38 efficacy of psychiatric and general medicine medication into perspective: review of meta-  
39 analyses, *Br J Psychiatry*, 2012. 200(2), 97-106.  
40  
41  
42  
43  
44  
45  
46  
47  
48  
49  
50  
51  
52  
53  
54  
55  
56  
57  
58  
59  
60

**Table I. Characteristics of included studies (n=10)**

| <b>Study<br/>Location<br/>Design</b>                                   | <b>Strategy<br/>Participants<br/>Setting</b>                                                                                                         | <b>Description</b>                                                                                                                                                                                              |
|------------------------------------------------------------------------|------------------------------------------------------------------------------------------------------------------------------------------------------|-----------------------------------------------------------------------------------------------------------------------------------------------------------------------------------------------------------------|
| Wyatt et al. 1996<br>UK<br>RCT                                         | Educational visit to obstetricians and midwives in 25 district obstetric units                                                                       | Educational visit (single) by a respected obstetrician advancing general ways to apply evidence from Cochrane reviews with The Cochrane database donated. Visit to lead obstetrician and midwife on labour ward |
| Gulmezoglu et al. 2006<br>Mexico, Thailand<br>Cluster randomized trial | Multi-faceted intervention: interactive workshops in 40 maternity units in non-academic hospitals including doctors, midwives, interns, and students | 3 interactive workshops using RHL over 6 months, focusing on access and use with the focus on the RHL contents in general.                                                                                      |
| Harris et al. 2006<br>Australia<br>Controlled clinical trial.          | Patient manual to doctor's patients in 3 hospitals                                                                                                   | Patient manual of summaries of Cochrane reviews: 80 page, A5 size manual with 22 summaries of evidence organised into easy to find sections                                                                     |
| Oermann et al. 2007<br>USA<br>RCT                                      | Short summary of systematic review to fifty nurses in medical and surgical units in seven hospitals                                                  | Four short, one-page systematic review summaries delivered by e-mail or mail, on patient-controlled analgesia                                                                                                   |
| Davis et al. 2007<br>UK<br>RTC                                         | Computer-based session newly qualified medical doctors in 6 post-graduate centres                                                                    | CD ROM sessions, 40 minutes duration, emphasizing critical and application of systematic reviews and meta-analyses.                                                                                             |
| Kulier et                                                              | E-learning course to                                                                                                                                 | 3 e-learning modules focusing on                                                                                                                                                                                |

|                                                                                                                                                          |                                                                                          |                                                                                                                                                                                       |                                                                                                                                                                                                   |
|----------------------------------------------------------------------------------------------------------------------------------------------------------|------------------------------------------------------------------------------------------|---------------------------------------------------------------------------------------------------------------------------------------------------------------------------------------|---------------------------------------------------------------------------------------------------------------------------------------------------------------------------------------------------|
| 1<br>2<br>3<br>4<br>5<br>6<br>7<br>8<br>9<br>10<br>11                                                                                                    | al. 2008<br>Before-and<br>after-design<br>Germany, Hungary,<br>Spain, Switzerland,<br>UK | post-graduate medical trainees<br>from different specialities<br>in primary and secondary care                                                                                        | systematic reviews, with unlimited<br>access over 6 weeks                                                                                                                                         |
| 12<br>13<br>14<br>15<br>16<br>17<br>18<br>19<br>20<br>21<br>22<br>23<br>24                                                                               | Davis et<br>al. 2008.<br>UK<br>RCT                                                       | Computer-based<br>session for medical<br>undergraduates in<br>a medical school<br>setting                                                                                             | 1 computer (CD-ROM) session focusing on<br>systematic reviews and meta- analyses<br>with a standardised structure of 40 minutes                                                                   |
| 25<br>26<br>27<br>28<br>29<br>30<br>31<br>32<br>33<br>34                                                                                                 | Kulier et<br>al. 2009<br>Netherlands<br>UK<br>Cluster RCT                                | E-learning course for<br>postgraduate trainees in<br>6 obstetrics and<br>gynaecology departments                                                                                      | 5 e-learning modules focusing on<br>systematic reviews, over 5 weeks<br>with on the job training, self-directed<br>learning                                                                       |
| 35<br>36<br>37<br>38<br>39<br>40<br>41<br>42<br>43<br>44<br>45<br>46<br>47<br>48<br>49<br>50<br>51<br>52<br>53<br>54<br>55<br>56<br>57<br>58<br>59<br>60 | Dobbins et<br>al. 2009<br>Canada<br>RCT                                                  | Tailored, targeted<br>messaging,<br>on-line registry,<br>knowledge broker<br>to 108 health departments:<br>programme managers,<br>programme coordinators,<br>and programme directors. | Messages from 7 rigorous systematic<br>reviews. A series of e-mails with link to<br>full reference, abstract and summary. Also<br>a visit from knowledge broker and access<br>an on-line registry |
|                                                                                                                                                          | Hadley et<br>al. 2010<br>UK<br>Cluster RCT                                               | E-learning course<br>focusing on<br>systematic reviews with<br>post-graduate doctors<br>at internship level<br>in 7 teaching hospitals                                                | Clinically integrated e-learning EBM course<br>3 modules involving critical appraisal of<br>systematic reviews, unlimited access over<br>6 weeks                                                  |

**Table 2.** PubMed was searched from January 2011 to January 2014 using the advanced search facility

| Search | Query                                                                    | Items found |
|--------|--------------------------------------------------------------------------|-------------|
| 1      | systematic review AND facilitators AND knowledge uptake                  | 3           |
| 2      | meta-analysis AND facilitators AND knowledge uptake                      | 3           |
| 3      | systematic review AND enhance* AND knowledge uptake                      | 143         |
| 4      | meta-analysis AND enhance* AND knowledge uptake                          | 4           |
| 5      | systematic review AND facilitator* AND knowledge utilisation             | 0           |
| 6      | meta-analysis AND facilitator* and knowledge utilisation                 | 0           |
| 7      | systematic review AND improve* AND knowledge utilisation                 | 18          |
| 8      | meta-analysis AND improve* AND knowledge utilisation                     | 4           |
| 9      | overview* OR review* AND intervention AND knowledge translation          | 156         |
| 10     | systematic review* OR meta-analys* AND intervention* AND evidence uptake | 56          |

387 citations were returned by PubMed but no further relevant studies were identified

**Table 3. Synthesis Matrix juxtaposing Interventions, Barriers and Facilitators**

| Interventions                                              | Barriers addressed                                                                                                    | Facilitators addressed                                                                                                   |
|------------------------------------------------------------|-----------------------------------------------------------------------------------------------------------------------|--------------------------------------------------------------------------------------------------------------------------|
| <b>Tailored, targeted messaging</b><br>Dobbins et al. 2009 | Lack of access<br>Lack of awareness<br>Lack of familiarity                                                            | A graded format<br>Delivery: Web-based<br>Consistent presentation<br>Increased access                                    |
| <b>Educational visits</b><br>Wyatt et al. 1998             | Lack of use<br>Lack of awareness<br>Lack of access<br>Lack of familiarity<br>Lack of usefulness<br>Lack of motivation | Usefulness<br>Training<br>Peer-group support<br>Delivery: CD ROM<br>Perceived ease of use<br>Position in an organisation |



|                                                                                             |                                                                                                                                                                                                                                                         |                                                                                                                                                                                            |
|---------------------------------------------------------------------------------------------|---------------------------------------------------------------------------------------------------------------------------------------------------------------------------------------------------------------------------------------------------------|--------------------------------------------------------------------------------------------------------------------------------------------------------------------------------------------|
|                                                                                             | External barriers                                                                                                                                                                                                                                       | Organisational value<br>Motivation, Increased access,                                                                                                                                      |
| <b>Brief summaries</b><br>Oermann et al 2007                                                | Lack of awareness<br>Lack of access<br>Lack of familiarity<br>Lack of usefulness<br>External barriers<br>Lack of relevance<br>Ignore target audience                                                                                                    | Usefulness<br>Highlighted content<br>A graded format<br>Delivery: Web-based<br>Position in an organisation<br>Increased access                                                             |
| <b>Multi-faceted educational intervention</b><br>Gulmezoglu et al. 2006                     | Lack of use<br>Lack of awareness<br>Lack of access<br>Lack of familiarity<br>Lack of usefulness<br>Lack of motivation<br>External barriers<br>Lack of relevance<br>Lack of implementation strategies<br>Ignore target audience                          | Training<br>Peer-group support<br>Delivery: Web-based<br>Organisational value<br>Motivation<br>Increased access<br>Familiarity with computers                                              |
| <b>Manual of Cochrane Reviews</b><br>Harris et al. 2006                                     | Lack of use<br>Lack of awareness<br>Lack of access<br>Lack of familiarity<br>Lack of usefulness<br>External barriers<br>Lack of relevance<br>Ignore target audience<br>Lack of implementation strategies                                                | Usefulness<br>Highlighted content<br>Format: summaries<br>Delivery: paper-based<br>Ability to improve confidence<br>Position in an organisation<br>Motivation<br>Increased access          |
| <b>E- learning course</b><br>Kulier et al. 2009<br>Kulier et al. 2008<br>Hadley et al. 2010 | Lack of use<br>Lack of awareness<br>Lack of access<br>Lack of familiarity<br>Lack of usefulness<br>External barriers<br>Lack of relevance<br>Lack of implications<br>Ignore target audience<br>Lack of implementation strategies                        | Usefulness<br>Training<br>Peer-group support<br>Delivery: Web-based<br>Position in an organisation<br>Motivation<br>Increased access<br>Increased confidence<br>Organisational values      |
| <b>Access to online registry</b><br>Dobbins et al. 2009 Lack of                             | Lack of awareness<br>Lack of access                                                                                                                                                                                                                     | Delivery: Web-based<br>Increased access                                                                                                                                                    |
| <b>Knowledge brokers</b><br>Dobbins et al. 2009                                             | Lack of awareness<br>Lack of access<br>Lack of familiarity<br>Lack of usefulness<br>Lack of use<br>Lack of relevance<br>Lack of implications for practice<br>Lack of implementation strategies<br>Ignore target audience<br>Lack of workshop attendance | Usefulness<br>Graded format<br>Training<br>Peer-group support<br>Delivery: Web-based<br>Consistent presentation<br>Position in an organisation<br>Organisational value<br>Increased access |

|                                        |                                   |                             |
|----------------------------------------|-----------------------------------|-----------------------------|
|                                        | Lack of positive climate          |                             |
| <b>Computer-based (CD-ROM) session</b> | Lack of use                       | Usefulness                  |
|                                        | Lack of awareness                 | Training                    |
| Davis et al. 2008                      | Lack of access                    | Peer-group support          |
| Davis et al. 2007                      | Lack of familiarity               | Delivery: CD ROM            |
|                                        | Lack of usefulness                | Position in an organisation |
|                                        | External barriers                 | Organisational value        |
|                                        | Lack of implications for practice | Increased access            |
|                                        | Lack of implementation strategies | Familiarity (computers)     |
|                                        | Ignore target audience            |                             |

For peer review only

# BMJ Open

## IMPROVING THE UPTAKE OF SYSTEMATIC REVIEWS: A SYSTEMATIC REVIEW OF INTERVENTION EFFECTIVENESS AND RELEVANCE

|                                 |                                                                                                                                                                                    |
|---------------------------------|------------------------------------------------------------------------------------------------------------------------------------------------------------------------------------|
| Journal:                        | <i>BMJ Open</i>                                                                                                                                                                    |
| Manuscript ID:                  | bmjopen-2014-005834.R1                                                                                                                                                             |
| Article Type:                   | Research                                                                                                                                                                           |
| Date Submitted by the Author:   | 04-Sep-2014                                                                                                                                                                        |
| Complete List of Authors:       | Wallace, John; University of Oxford, Continuing Education<br>Byrne, Charles; Health Service Executive, Dept of Psychiatry<br>Clarke, Mike; Oxford University, Continuing Education |
| <b>Primary Subject Heading</b>: | Medical education and training                                                                                                                                                     |
| Secondary Subject Heading:      | Evidence based practice, Qualitative research, Health informatics                                                                                                                  |
| Keywords:                       | Health informatics < BIOTECHNOLOGY & BIOINFORMATICS, Information technology < BIOTECHNOLOGY & BIOINFORMATICS, MEDICAL EDUCATION & TRAINING                                         |
|                                 |                                                                                                                                                                                    |

SCHOLARONE™  
Manuscripts

## IMPROVING THE UPTAKE OF SYSTEMATIC REVIEWS: A SYSTEMATIC REVIEW OF INTERVENTION EFFECTIVENESS AND RELEVANCE

Dr John Wallace, PhD reader, Dept of Continuing Education, Rewley House, Wellington Square, Oxford OX1 2JA, UK, john.wallace@wadh.oxon.org, Tel: 00353 682694883, Fax: 00353 906627271

Dr Charles Byrne, Dept of Psychiatry, Roscommon County Hospital, Roscommon, Ireland  
Professor Mike Clarke, Dept of Continuing Education, Rewley House, Wellington Square, Oxford, UK.

Key words: Evidence-based medicine, knowledge translation, quantitative research, qualitative research, mixed-methods research

Word count: 4,668

All authors were involved in the conceptualization, conduct, preparation, and writing up of the research. All authors made a substantial contribution to the design, acquisition, analysis and interpretation of data. All were involved in the drafting and revision of the article for intellectual content and all approved the final version.

### ABSTRACT

**Objective:** Little is known about the barriers, facilitators and interventions that impact on systematic review uptake. The objective of this study was to identify how uptake of systematic reviews can be improved.

**Selection criteria:** Studies were included if they addressed interventions enhancing the uptake of systematic reviews. Reports in any language were included. All decision makers were eligible. Studies could be randomised trials, cluster-randomised trials, controlled-clinical trials and before-and-after studies.

**Data sources:** We searched 19 databases including PubMed, Embase and The Cochrane Library, covering the full range of publication years from inception to December 2010. Two reviewers independently extracted data and assessed quality according to the Effective Practice and Organisation of Care criteria.

**Results:** Ten studies from 11 countries, containing 12 interventions met our criteria. Settings included a hospital, a government department and a medical school. Doctors, nurses, midwives, patients and programme managers were targeted. Six of the studies were geared to improving knowledge and attitudes while four targeted clinical practice.

**Synthesis of results:** Three studies of low-to-moderate risk of bias, identified interventions that showed a statistically significant improvement: educational visits, short summaries of systematic reviews, and targeted messaging. Promising interventions include e-learning, computer-based learning, inactive workshops, use of knowledge brokers, and an e-registry of reviews. Juxtaposing barriers and facilitators alongside the identified interventions, it was clear that the three effective approaches addressed a wide range of barriers and facilitators.

**Discussion:** A limited number of studies were found for inclusion. However, the extensive literature search is one of the strengths of this review.

Conclusion: Targeted messaging, educational visits, and summaries are recommended to enhance systematic review uptake. Identified promising approaches need to be developed further. New strategies are required to encompass neglected barriers and facilitators. This review addressed effectiveness and also appropriateness of knowledge uptake strategies.

## ARTICLE SUMMARY

### Article focus

What interventions improve the uptake of systematic reviews and meta-analyses?  
What barriers are overcome and what facilitators are built on by the various interventions?  
What interventions can be recommended and what strategies are promising for enhanced systematic review uptake?

### Key messages

Tailored messaging, educational visits and summaries are recommended to improve uptake of systematic reviews  
Interactive workshops, e-learning programmes and computer-based approaches are promising  
New strategies should be designed to address identified but neglected barriers and facilitators.

### Strengths and limitations

Strengths included an extensive search of 19 databases  
The review had added value by drawing on 27 barrier and 15 facilitator studies  
Both effectiveness and appropriateness are addressed  
However, just 10 intervention studies were detected

## INTRODUCTION

Although the importance of research evidence is largely unquestioned intellectually, medical practice often diverges from evidence-based recommendations. This denies patients the benefits of medical research.<sup>1</sup> Despite initiatives to improve the use of research findings, variation in the uptake of evidence exists.<sup>2</sup> The communication of clinically important research is hampered by the volume and geometric growth of the medical literature. Systematic reviews can address this problem and are a good way of taming the evidence.<sup>3</sup> A systematic review is a 'review of a clearly formulated question that uses systematic and explicit methods to identify, select and critically appraise relevant research, and to collect and analyse data from studies that are included in the review'.<sup>4</sup>

Evidence from systematic reviews however has not been widely adopted by healthcare professionals.<sup>5</sup> A review of physicians' information-seeking behaviour found that textbooks are the most frequently used source of information, followed by advice from colleagues.<sup>6</sup>

1  
2  
3 Systematic reviews were never cited as the source of research evidence when such evidence  
4 was used by policy makers and healthcare managers.<sup>7</sup> Research into interventions for  
5 enhancing the uptake of evidence by clinical practitioners and by policy makers indicate that  
6 further examination of the issue is warranted.<sup>8,9</sup>  
7

8  
9 The creation of systematic reviews without attention to their uptake is clearly a sterile  
10 exercise. Systematic reviews were the focus of this investigation, rather than the more  
11 commonly investigated clinical practice guidelines or individual, primary studies. Systematic  
12 reviews are based on primary research while clinical practice guidelines are an amalgam of  
13 clinical experience, expert opinion, patient preferences, and evidence. Systematic reviews are  
14 a scientific exercise aimed at generating new knowledge and they provide a summary of  
15 relevant primary research. In this way, they can help keep us current. Systematic reviews  
16 have a distinct development and scientific purpose that differs from both guidelines and  
17 primary research. Given the considerable differences between integrative reviews and clinical  
18 practice guidelines, we set out to identify factors enhancing the uptake specifically of  
19 systematic reviews and meta-analyses.  
20  
21  
22

23  
24 The current authors had previously identified the barriers<sup>10</sup> and also the facilitators<sup>11</sup>  
25 impacting on systematic review uptake. Outcome studies of interventions that attempt to  
26 enhance systematic review uptake were now addressed. Uptake encompassed an increase in  
27 awareness, familiarity and intellectual adoption as well as practical use in decision making,  
28 giving this review a broader focus than previous work in the area.<sup>2,8,9</sup> Nor were the decision  
29 makers included in this review limited to any specific background as occurs in other reviews.  
30  
31  
32

33  
34 Importantly, a further synthesis was also carried out integrating the previously identified  
35 barriers and facilitators with the newly selected interventions detected in our systematic  
36 review. This study was needed in order to identify strategies that can be used to improve  
37 systematic review uptake. By drawing on our previous barrier and facilitator research, the  
38 appropriateness of these newly identified interventions can now also be estimated. This  
39 review has added value. Having assessed not just the effectiveness but also the relevance of  
40 the detected interventions, recommendations can now be made about the use of specific  
41 strategies to improve systematic review uptake.  
42

43  
44 There are challenges however to synthesizing such diverse evidence sources.<sup>12</sup> A hybrid  
45 approach was used here to address different but related elements of an overall review  
46 question.<sup>13</sup> Separate syntheses of intervention but also non-intervention studies, with an  
47 overall narrative commentary, are described.  
48

49  
50 The studies to be included in our review were diverse. For barriers and natural facilitators, the  
51 reports included surveys, focus groups, and interviews.<sup>10,11</sup> But intervention studies were also  
52 included in the final overarching synthesis. So results from qualitative studies were  
53 juxtaposed with results of randomized-controlled trials. Data was extracted from these  
54 disparate studies and a synthesis carried out.<sup>14</sup>  
55

56  
57 Attention to other vantage points that decision makers adopt when confronted with an  
58 innovation is important.<sup>15</sup> The aim here was to illuminate a complex area from different  
59 angles.<sup>16</sup> The objective was also to identify gaps in existing research evidence.<sup>17</sup> Narrative  
60

1  
2  
3 synthesis provided a summary of the current state of knowledge where recommendations  
4 could then be made for enhancing uptake of evidence from systematic reviews.<sup>13</sup>  
5

## 6 **Method**

### 7 *Search strategy*

8  
9 We conducted a systematic review of the literature to identify interventions to enhance  
10 evidence uptake from systematic reviews, meta-analyses, and the databases containing them.  
11 The primary researcher (JW) searched 19 databases and used 3 search engines, for articles,  
12 not limited to the English language, and covering the full range of publication years available  
13 in each database up to Dec 2010 using a combination of index terms and text words derived  
14 from relevant articles previously identified.  
15  
16

17  
18 The databases searched included the Cochrane Library, TRIP, Joanna Briggs Institute,  
19 National Guideline Clearing House, Health Evidence, PubMed (1950-Dec 2010), EMBASE  
20 (1980-Dec 2010), ERIC, CINAHL, PsycInfo, OpenSigle, Index to Theses in Great Britain  
21 and Ireland, and Conference Papers Index, Campbell Collaboration, Canadian Health  
22 Services Research Foundation, EPOC, KT+, McMaster University, Keenan Research Centre,  
23 and the New York Academy of Medicine. The search engines ALTA VISTA and Google  
24 Scholar were also utilised with a special emphasis on grey and knowledge translation  
25 literature. References from included primary studies and related review articles were scanned,  
26 experts in the field contacted, and bibliographies of textbooks were reviewed. A combination  
27 of index terms and text words was used generated by the structured research question. A wide  
28 range of synonyms for uptake were combined with various terms for synthesis and systematic  
29 reviews, together with synonyms for improvement. Search terms, including systematic  
30 review and meta-analysis, were combined with terms for interventions or uptake, together  
31 with the synonyms for improve or enhance. A wide range of search terms was employed  
32 including facilitator, incentive, improve, enhance, disseminate, utilise, translate, uptake,  
33 intervention, overview, systematic review and meta-analysis. The search terms, using  
34 truncation, were linked into the search strategy using Boolean operators. The strategy was  
35 broadened or narrowed depending on need or result when applied to the different databases  
36 listed. Uptake encompassed connectivity, awareness, familiarity, adoption, use, and  
37 healthcare outcomes.  
38  
39

40  
41 We repeated parts of the search for the period January 2011 to January 2014 in order to  
42 identify any potentially relevant or on-going studies. We applied the same search strategies to  
43 PubMed and EMBASE, the two most productive databases in terms of studies identified for  
44 inclusion in the review. We also searched all active registers in the *metaRegister* of controlled  
45 trials (<http://www.controlledtrials.com/mrct/>), in January 2014, for reports of relevant on-  
46 going or completed trials, to be listed under 'On-going studies' and 'Studies awaiting  
47 classification' that could be included in an update of this review.  
48

### 49 *Selection criteria*

50 Two review authors independently assessed studies for inclusion; discrepancies were  
51 resolved by discussion or by a third party. Studies with no clear relation to systematic review  
52 uptake were excluded. We included studies if they were an original collection of data.  
53  
54  
55  
56  
57  
58  
59  
60

### *Inclusion criteria*

To be included in the review, primary studies had to meet the following criteria:

- Addressed interventions aimed at increasing the uptake of evidence specifically from systematic reviews, meta-analyses and the databases that contained them
- Databases could include The Cochrane Library, The Cochrane Database of Systematic Reviews, Database of Abstracts of Reviews of Effects, Cochrane Pregnancy and Childbirth Database, Oxford Database of Perinatal Trials, and the Reproductive Health Library
- All decision makers, including doctors, nurses, policy makers, the public and patients, were eligible
- Reports in any language were included
- Studies could be randomised trials, cluster randomised trials, controlled clinical trials and before-and-after studies
- Interventions could arise from within the research community or from within an organisation using systematic review evidence
- Strategies could be single-stranded or multi-faceted, or combine two or more interventions
- The mode of delivery of the intervention could be print, electronic, audio/visual or face-to face
- When a comparison was employed, the comparator could be no intervention or an alternative intervention
- It was not required that the interventions be specifically tailored to overcome specified, pre-identified barriers
- Measures of impact on knowledge, attitude, behaviour, or patient care were included

‘Uptake’ can refer to an increase in awareness, familiarity, adoption, as well as actual use of evidence. While measures of impact on knowledge, attitude or use of reviews were included, impact on patient care was also encompassed. Any outcome measure of the utilisation of systematic review evidence informing health care decision making was considered. Self-reported use of evidence was included as well as outcome measures of practical use. Interventions could arise from within the research community or from within an organisation using systematic review evidence. Strategies to enhance uptake of policy briefs, position statements or clinical practice guidelines were excluded.

Care was also taken to identify studies that produced multiple publications. When more than one report described a single study and each presented the same data, only the most recent publication was included. However, if more than one publication described a single study but each presented new and complementary data, both were included.

### *Data collection and analysis*

Two reviewers (JW and CB) independently abstracted specific information from full-text studies according to standardized data extraction checklist items derived from Cochrane Effective Practice and Organisation of Care criteria checklists.<sup>18</sup> Discordances between the two reviewers were resolved by consensus. Two reviewers assessed the risk of bias of included studies using criteria described by EPOC. For all of the studies included in the



1  
2  
3 review, we assigned an overall risk of bias rating such as high, moderate and low based on  
4 the standard criteria used in EPOC reviews.  
5

6 Strategies with a non-significant, a negative effect or did not meet the study objectives,  
7 compared with the primary objective of the authors, were classified as “ineffective”; “mixed  
8 effects” was ascribed to studies that partially reached their objectives; and strategies with a  
9 significant, positive effect were classified as “effective”.<sup>19</sup> No meta-analysis was performed  
10 because of the high heterogeneity between the outcomes of each study.<sup>20</sup> Reviews of  
11 research-to-action strategies add up the number of positive and negative comparisons and  
12 conclude whether interventions were effective on that basis.<sup>21</sup>  
13  
14

#### 15 *Assessment of risk of bias*

16 Two reviewers assessed the risk of bias of included studies using criteria described by EPOC.  
17 Given the potential heterogeneity of the targeted behaviours, skills, and organisational factors  
18 relevant to the review, this reviewer did not base study inclusion on a minimum cut-off for  
19 methodological quality. For all of the studies included in the review, this reviewer assigned  
20 an overall risk of bias rating such as high, moderate and low, based on the standard criteria  
21 used in EPOC reviews. We assigned a rating of low risk of bias if the first three criteria were  
22 scored as done and there were no concerns related to the last three criteria; moderate if one or  
23 two criteria were scored as not clear or not done; and high if more than two criteria were  
24 scored as not clear or not done.<sup>22</sup> Each criterion was noted “Done,” “Not clear,” or “Not  
25 done”. Only studies with a low to moderate risk of bias were used to draw conclusions about  
26 effectiveness of interventions to enhance uptake of reviews.  
27  
28

#### 29 **Data synthesis**

30 There is a tendency for more recent systematic reviews to include a wider range of diverse  
31 study designs.<sup>23</sup> A broader focus is now advocated.<sup>15</sup> Research findings on barriers and  
32 facilitators impacting on review uptake can help in the development of potentially effective  
33 intervention strategies. The interventions can modify or remove barriers and use and build  
34 upon existing facilitators to enhance evidence uptake. Following formal identification of  
35 strategies to improve uptake of systematic reviews, these interventions were then juxtaposed  
36 with previously highlighted barriers and facilitators.  
37  
38

39 A framework for including different types of evidence in systematic reviews was used here.<sup>13</sup>  
40 This approach has been successfully applied elsewhere.<sup>24-27</sup> Using a mixed-methods  
41 approach, three types of analyses were performed. These included a synthesis of non-  
42 intervention studies, a synthesis of intervention outcome evaluations, and lastly a synthesis of  
43 the intervention and non-interventions studies together. For the last of these, a matrix was  
44 constructed which laid out the barriers and facilitators alongside descriptions of the  
45 interventions included in the in-depth systematic review of outcome evaluations. It was thus  
46 possible to see where barriers have been modified, or facilitators built upon, by relatively  
47 sound interventions. It was also possible to identify promising interventions that need further  
48 assessment.<sup>13</sup> Furthermore, it was practical to ascertain where factors had not been addressed  
49 by any approach, necessitating the development of new interventions.  
50  
51  
52

53 The initial purpose of this review was to identify interventions that improve uptake of  
54 systematic reviews. The next objective was to ascertain whether the detected interventions  
55 addressed issues important to decision makers. This allowed a utilization of views on barriers  
56 and facilitators as a marker of the appropriateness of different interventions.<sup>13</sup>  
57  
58  
59  
60

## RESULTS

The results of the extensive search for studies addressing interventions that enhance uptake of systematic reviews are given in Figure 1.

**Figure 1. PRISMA Flow diagram**

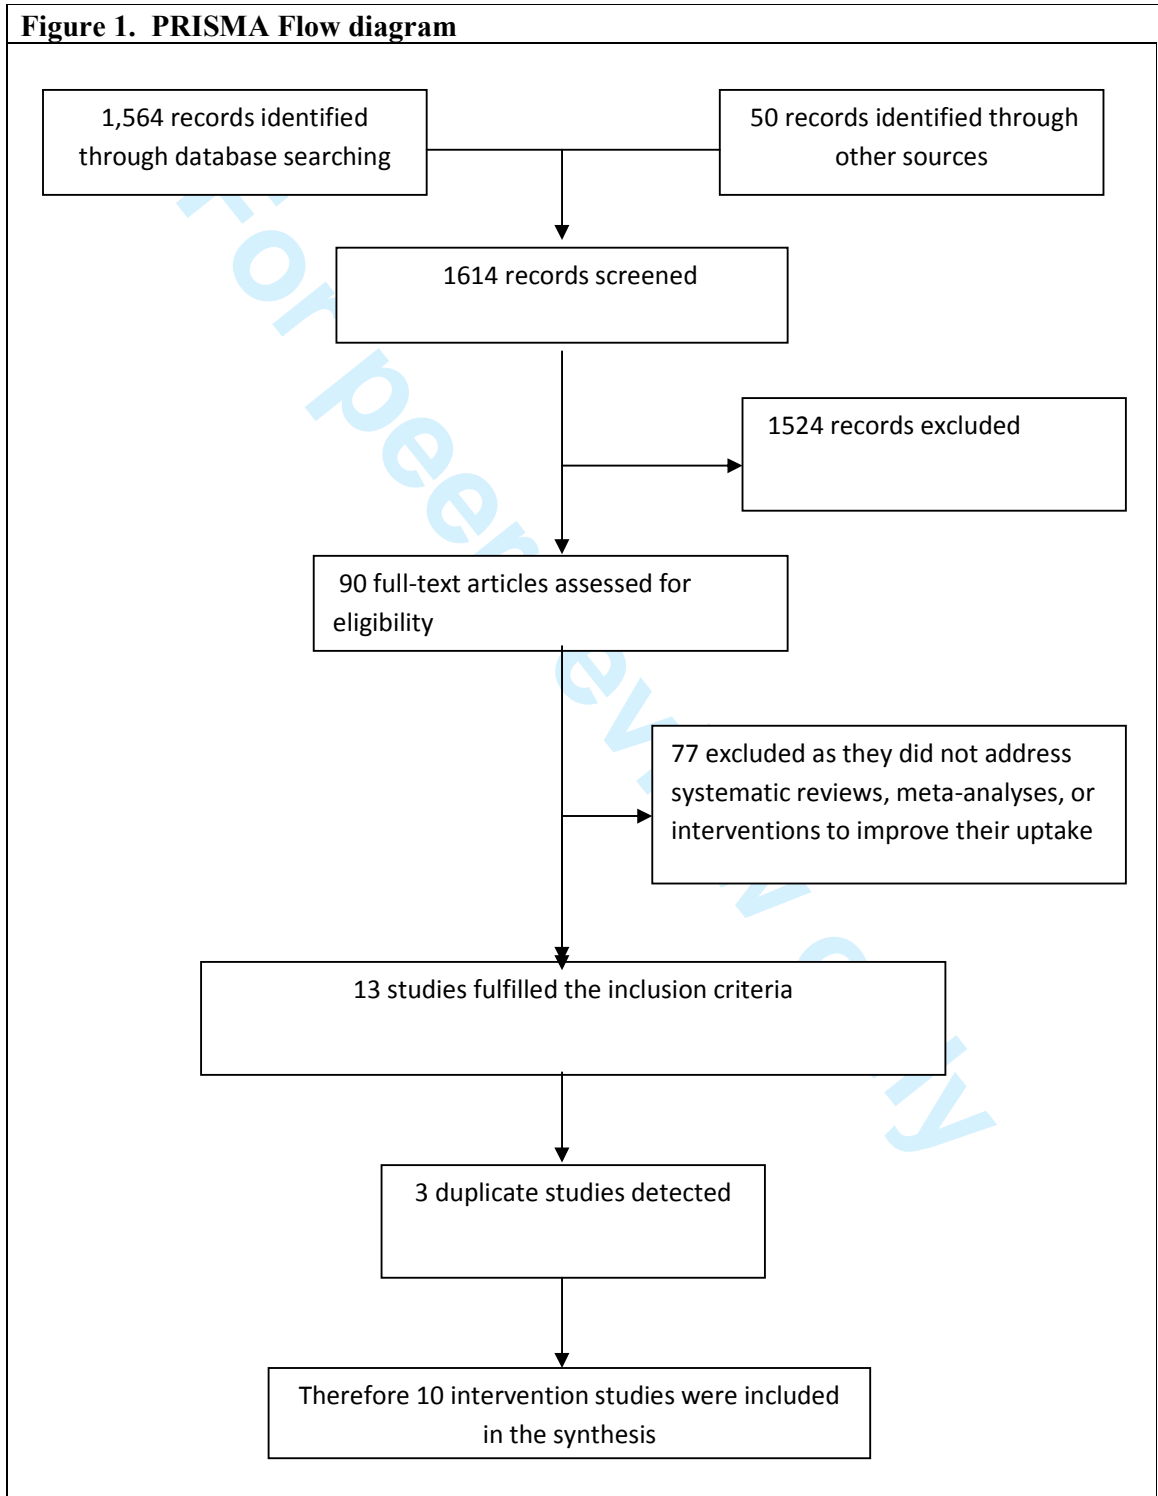

## Results of the search

Some 1,564 records were identified through database searching covering the full range of publication years available in each of the 19 database up to December 2010 and 50 records identified through other sources, such as bibliographies of related reviews and primary studies, textbooks and contact with authors. Of the total number of 1,614 titles and abstracts screened from all sources, including qualitative and grey literature searching, 1,524 records were excluded as not meeting inclusion criteria. Then 90 full-text articles were retrieved and assessed for eligibility. Some 62 studies were excluded as they did not address systematic reviews or meta-analysis, 3 were duplicate studies, and 15 studies were excluded and analysed separately as they addressed natural, non-intervention facilitators derived from surveys, focus groups and interviews.<sup>11</sup> A selective list of studies excluded after reading the full text is given as a supplementary file. Ten intervention studies were included and form the substrate for this review (Table 1).

A further search of EMBASE and PubMed from Jan 2011 to January 2014 yielded 248 and 387 records respectively but failed to identify any further relevant studies. The *metaRegister* of controlled trials was also searched in January 2014 and no study was identified for inclusion in 'Studies awaiting classification' or 'On-going studies'. An example the search strategies utilised is given in Table 2.

## Included studies

Of the ten included intervention studies, this researcher counted 5 randomised controlled trials, 3 cluster randomised controlled trials, 1 controlled clinical trial, and 1 before-after study.<sup>28-37</sup> There were 8 two-arm trials, 1 single-arm trial and 1 three-armed trial. The unit of allocation was the health professional, such as a doctor, in 3 studies, the patient in 1 report, and a larger grouping such as the hospital or geographical location in 6 studies.

### *Settings and characteristics of professionals*

The nature of the desired change, professionals targeted, and the settings, differed from one intervention study to the next. Four studies were undertaken in the UK, 1 each in Australia, USA and Canada while 1 study was conducted across five countries: Germany, Hungary, Spain, Switzerland and the UK. The remaining 2 studies were carried out in the Netherlands and the UK, and in Mexico and Thailand, respectively. The studies were conducted in 11 countries in total.

Eight of the intervention studies took place in a hospital setting while the remaining two investigations were conducted in a government department and a medical school. In 6 of the studies, the professionals included doctors of different sub-specialities and at varying stages of training. Two studies dealt with obstetricians, 1 study included psychiatrists, another GPs, and 2 studies involved Interns (Foundation year). Three reports included nurses or midwives, one targeted patients as participants exclusively, while another looked at programme managers.

### *Prospective identification of barriers to change*

None of the 10 studies tailored the intervention to prospectively identified barriers to uptake of evidence from systematic reviews or meta-analyses.

### *Theoretical underpinning*

Eight studies identified a theoretical underpinning to their choice of intervention. One study included a costing for their intervention to improve uptake of evidence from systematic reviews.<sup>28</sup>

### *Characteristics of interventions*

Among these reports, interventions included clinically integrated e-learning courses (3/10), educational visits (2/10), a computer-based (CD-ROM) session focusing on critical appraisal of systematic reviews (2/10), brief summaries of systematic reviews (1/10), a manual of Cochrane reviews (1/10), and access to an online registry, tailored messaging and use of knowledge brokers (1/10). Descriptions of the strategies are outlined in Table 1. One study investigated three interventions.<sup>33</sup>

### *Risk of bias in included studies*

Of the 10 included studies, 8 had addressed allocation concealment. Follow-up of professionals was carried out adequately in 6 studies. Blinded assessment of the primary outcome was carried out in 9 studies. Baseline measurement was conducted adequately in 5 studies. A reliable primary outcome measure was reported in all 10 studies. Protection against contamination was assessed by us as adequate in 7 studies. Regarding the overall risk of bias, 2 studies were assessed as being at high risk,<sup>34,35</sup> two at low risk of bias,<sup>28,32</sup> while 6 studies were regarded as being of moderate risk of bias.<sup>29,30,31,33,36,37</sup>

### *Outcomes*

Use of correct outcome measures in this area is of considerable importance.<sup>38</sup> Six studies were concerned with changing knowledge and attitudes. One report analysed both knowledge and decision-maker behaviour<sup>30</sup> while another<sup>31</sup> addressed practice and quality of life. Two studies analysed specific practice change (Table 3).<sup>28,33</sup>

Three studies, of low-to-moderate risk of bias, showed a statistically significant improvement on some relevant outcome. These interventions included educational visits<sup>28</sup>, short summaries of systematic reviews<sup>29</sup>, and targeted messaging.<sup>33</sup>

Other interventions such as interactive workshops produced 'substantial' benefits.<sup>30</sup> Clinically integrated e-learning courses and a computer-based series of teaching sessions brought about some knowledge and attitude gain from baseline (Table 3).

### **Synthesis of barrier, facilitator and intervention studies**

Having identified ten reports meeting our criteria as intervention outcome studies, we then went on to juxtapose these interventions with the barrier and facilitator studies identified in two systematic reviews previously conducted by the authors.<sup>10,11</sup>

Figure 2 outlines the number of studies included at various stages of this second, overarching review. Systematic and exhaustive searches identified 3,329 citations in total. Retrieval, screening, and classification of full reports had previously resulted in the identification of 27 studies addressing barriers and 15 studies that included facilitators.<sup>10,11</sup> These were now joined by the 10 studies evaluating interventions to enhance systematic review uptake.<sup>28-37</sup> Use of multiple data sources can enhance the credibility of findings.<sup>39</sup> Intervention study characteristics were included in Table 1 while barrier and facilitator study characteristics

were described previously.<sup>10,11</sup>The synthesis of these barrier, facilitator, and intervention studies, with the 3 most effective interventions listed first, is outlined in Table 4.

**Figure 2. An overview of all stages of the review and the approach taken**

|                                                                                                                                                                                                                                                                                                                                                                                                                                                                      |                                                                                                                                                                                                                                                                                                                                                                                          |
|----------------------------------------------------------------------------------------------------------------------------------------------------------------------------------------------------------------------------------------------------------------------------------------------------------------------------------------------------------------------------------------------------------------------------------------------------------------------|------------------------------------------------------------------------------------------------------------------------------------------------------------------------------------------------------------------------------------------------------------------------------------------------------------------------------------------------------------------------------------------|
| <b>Review question</b>                                                                                                                                                                                                                                                                                                                                                                                                                                               |                                                                                                                                                                                                                                                                                                                                                                                          |
| ‘What is known about the barriers, facilitators, and interventions impacting on uptake of systematic reviews?’                                                                                                                                                                                                                                                                                                                                                       |                                                                                                                                                                                                                                                                                                                                                                                          |
| <b>Stage 1: Mapping and quality screening exercise</b>                                                                                                                                                                                                                                                                                                                                                                                                               |                                                                                                                                                                                                                                                                                                                                                                                          |
| Systematic and exhaustive searches identified 3,329 citations. Studies were included if they addressed barriers and facilitators to uptake of evidence specifically from systematic reviews, meta-analyses and the databases that contained them. Retrieval, screening, and classification of full reports resulted in the identification of 27 studies addressing barriers, 15 studies that included natural facilitators, and 10 studies evaluating interventions. |                                                                                                                                                                                                                                                                                                                                                                                          |
| <b>Non-intervention studies</b><br>Studies of decision makers’ views                                                                                                                                                                                                                                                                                                                                                                                                 | <b>Intervention studies</b><br>Rigorous evaluation studies of interventions<br>Focus on addressing impact on knowledge, attitude, behaviour and practice                                                                                                                                                                                                                                 |
| <b>Stage 2: in-depth review</b>                                                                                                                                                                                                                                                                                                                                                                                                                                      |                                                                                                                                                                                                                                                                                                                                                                                          |
| Synthesis across study types to answer sub-question:                                                                                                                                                                                                                                                                                                                                                                                                                 |                                                                                                                                                                                                                                                                                                                                                                                          |
| ‘To what extent do interventions overcome the barriers identified by decision makers and build upon the facilitators to uptake of evidence from systematic reviews?’                                                                                                                                                                                                                                                                                                 |                                                                                                                                                                                                                                                                                                                                                                                          |
| <b>Non-intervention (views) studies</b><br>Application of inclusion criteria resulted in 27 studies addressing barriers and 15 identifying facilitators.<br>Data extracted for description of characteristics and quality<br>Findings extracted<br>Findings synthesised to answer sub-question: ‘What are the views on uptake of evidence from systematic reviews?’                                                                                                  | <b>Intervention studies (outcome evaluations)</b><br>Application of inclusion criteria resulted in 10 outcome studies<br>Data extracted for description of characteristics and quality<br>Findings extracted<br>Eight out of 10 studies were of low-to-moderate risk of bias<br>Findings synthesised to answer: ‘What are the effects of interventions on uptake of systematic reviews?’ |

### Decision maker's views

Research indicates that the perceived barriers to the use of evidence from systematic reviews tend to vary.<sup>10</sup> The most commonly investigated barriers were lack of use, lack of awareness, lack of access, lack of familiarity, lack of perceived usefulness, lack of motivation, and external barriers related to the format and content of reviews and a prevailing negative organisational culture.

Perceived facilitators to the use of evidence from systematic reviews are also diverse.<sup>11</sup> The five most commonly reported facilitators to uptake of evidence from systematic reviews were: the perception of systematic reviews as having multiple uses; a content that included benefits, harms and costs; a format with graded access and executive summary; training in use, and peer-group support.

### Synthesis

Table 4 shows the synthesis matrix which juxtaposes barriers and facilitators alongside the results of outcome evaluations. The three interventions having a statistically significant impact on at least one outcome measure are listed first. There were some matches but also significant gaps between what decision makers see as helpful to evidence uptake from systematic reviews and, on the other hand, soundly evaluated interventions that addressed both facilitators and barriers.

Three interventions, of low-to-moderate risk of bias, had statistically significant results on at least one outcome measure. These strategies included targeted messaging, educational visits, and summaries of systematic reviews.

Tailored, targeted messaging addressed the specific barriers of limited access to, awareness of, and familiarity with systematic reviews. Targeted messaging also built on enhancers of uptake such as increased choice of format, with web-based delivery and an overall improved access. A graded format takes into account the disparate information needs of various disciplines at different positions in an organisation. It addresses the concern that one size does not fit all.

Educational visits overcame and built on a wide range of factors. Knowledge barriers such as lack of access, lack of awareness and familiarity; attitudinal barriers such as limited motivation, perceived lack of usefulness and relevance; and external barriers such as an adverse organisational climate, were impacted on by this complex intervention. Increased access and training were among the facilitators of uptake of systematic reviews built on by this approach that also took into account the information needs of the target audience and their level of training.

Brief summaries of systematic reviews overcame the knowledge barriers of lack of access, lack of awareness and familiarity; attitudinal barriers of perceived lack of usefulness and relevance; and the external barrier of systematic reviews usually having a standard format for all readers, regardless of their level of training. Brief summaries facilitated the uptake of evidence from systematic reviews by providing a one-page, web-based, useful synopsis that took into account the information needs and time demands of the target audience.

1  
2  
3 A number of other promising interventions, not achieving statistically significant results, also  
4 overcame important barriers and built on a number of facilitators. A multifaceted educational  
5 intervention addressed a wide range of knowledge, attitude, and external barriers, and also  
6 built on facilitators to produce substantial but non-significant knowledge and attitudinal  
7 gains.<sup>30</sup> A patient manual addressed similar barriers and facilitators as did the brief  
8 summaries of systematic reviews.<sup>31</sup>  
9

10  
11 A further three studies using e-learning, addressed a similar number of barriers and  
12 facilitators.<sup>32,34,35</sup> Each of the two computer-based interventions addressed the same factors in  
13 terms of number and content and brought about some non-significant, improvement between  
14 pre- and post-assessment.<sup>36,37</sup>  
15

16  
17 A number of issues were identified that had not been addressed by the effective or promising  
18 interventions. These were mainly facilitators and included building on the time-saving aspect  
19 of systematic reviews, their perceived ease of use, their importance relative to other sources  
20 of information, and their ability to improve confidence. The added value of logos and the  
21 advantages of consistent presentation were not utilised as often as they might have been.  
22

### 23 **Discussion**

24 This study systematically identified interventions that enhance the uptake of evidence from  
25 systematic reviews. Previous reviews tend to focus on practical use of systematic reviews<sup>2</sup>,  
26 rather than a more general uptake incorporating an increase in knowledge or a change in  
27 attitude. Previous overviews place an emphasis on use by specific decision makers such as  
28 policy makers<sup>8</sup> or clinicians<sup>9</sup> rather than including all stakeholders as occurs in this systematic  
29 review. Our review reported three interventions that had a statistically significant impact on  
30 at least one outcome measure rather than simply highlighting a positive trend.<sup>8,9</sup> Furthermore,  
31 our review did not base recommendations on studies deemed to have a low quality of  
32 evidence.<sup>9</sup>  
33  
34

35  
36 Indeed, this synthesis differed from others in that it incorporated a second overarching review  
37 in order to illustrate the extent to which the detected interventions addressed barriers and  
38 facilitators impacting on systematic review uptake. Importantly, this allowed our mixed-  
39 methods design, to generate recommendations about interventions to enhance review uptake.  
40

41  
42 The evidence for the effectiveness of interventions to improve systematic review uptake is  
43 variable. Three interventions, of low-to-moderate risk of bias, had a statistically significant  
44 advantage over a comparison on at least one outcome measure. These interventions included  
45 educational visits, short summaries of systematic reviews, and targeted messaging. Other  
46 interventions such as interactive workshops produced 'substantial' benefits, while clinically  
47 integrated e-learning courses and computer-based series of teaching sessions brought about  
48 some knowledge or attitude gain from baseline. No study demonstrated a significant impact  
49 directly on patient care.  
50

51  
52 Unlike other reviews, this study adopted a wider perspective through inclusion of studies of  
53 decision maker's views as well as outcome effectiveness studies. Taking account of a  
54 decision maker's preferences and abilities is important.<sup>39</sup> Juxtaposing perceived barriers and  
55 facilitators alongside effectiveness studies allowed us to examine the extent to which the  
56 needs of decision makers had been adequately addressed by the evaluated interventions. To  
57 some extent they had. Lack of access, awareness, and familiarity were frequently overcome  
58  
59  
60

1  
2  
3 as barriers. However, fewer of the identified facilitators appear to have been built on by the  
4 interventions.

5  
6 We recommend 3 interventions: tailored, targeted messaging, systematic review summaries,  
7 and educational visits. These address a range of factors impacting on review uptake. Some  
8 approaches however require additional work before they can be recommended for practice.<sup>40</sup>  
9 Interventions such as e-learning, computer-based learning, multifaceted educational  
10 interventions, an on-line registry and the use of a knowledge broker are strategies that need to  
11 be developed further.  
12

13  
14 Many of the gaps in the evidence about uptake of systematic reviews tended to be in relation  
15 to building on identified facilitators. Despite a wide search, we found few evaluations of  
16 strategies that emphasized the time-saving aspect of systematic reviews, their importance  
17 relative to other sources of information and their ability to improve self-confidence in using  
18 evidence. New interventions need to be developed that build on these enhancers of uptake.  
19

20  
21 A surprising finding was that, despite the wider range of barriers and facilitators addressed by  
22 use of a knowledge broker, this intervention was not as effective as targeted, tailored  
23 messaging.<sup>33</sup>The more complex intervention was not more effective. That targeted, tailored  
24 messaging overcame and built on a smaller number of barriers and facilitators suggests that it  
25 is not the number of factors addressed that is central but their relevance and intensity.  
26

### 27 *Limitations*

28 A frequent disappointment in the conduct of systematic reviews is the relative paucity of  
29 published primary studies on which to base the review.<sup>41</sup>We found just 10 intervention  
30 studies in all, with 8 of these of moderate-to-low risk of bias. Identification of published  
31 studies on evidence uptake is difficult because they are poorly indexed and scattered across  
32 generalist and specialist journals. Some publications may have been missed, though an  
33 extensive search was conducted using over 19 databases. Furthermore, reporting was  
34 sometimes incomplete so that data extraction was problematic.<sup>42</sup>  
35  
36

37 Important methodological limitations and inconsistencies among the studies identified make  
38 it extremely difficult, currently, to justify policy action taken on the basis of evidence alone.<sup>20</sup>  
39 The limitations of our review largely reflect the limitations of the literature reviewed.  
40 Undertaking reviews in this area is difficult because of the complexity inherent in the  
41 interventions, the variability of the methods used, and the difficulty of generalising findings  
42 across healthcare settings.  
43

44  
45 The impact of the interventions was not consistent across users, settings, or behaviours.  
46 Positive studies had just one or two of many outcome measures that yielded a significant  
47 result. Some studies presented a positive trend, others statistically significant outcomes.  
48 Certain interventions appeared to improve knowledge and attitudes, and to a lesser extent,  
49 performance. None were shown to impact on patient outcomes. This issue of patient-centred  
50 outcomes is likely to become more prominent in the coming years.<sup>15</sup> Although the current  
51 evidence base is incomplete, this synthesis does however provide valuable insights into the  
52 likely effectiveness of different interventions.  
53  
54

### 55 *Implications for research*

56 We need to standardize reporting of trials of interventions to improve professional  
57 performance. A broad framework should be developed for designing and selecting  
58  
59  
60



1  
2  
3 appropriate interventions across a wide range of professional activities in which gaps between  
4 evidence and practice are found.<sup>43</sup> Both clinical practice and also more patient outcome data  
5 are required.  
6

7 Barriers and facilitators can be used as starting point for intervention relevance.<sup>13</sup> This review  
8 can be considered a resource. The conclusions suggest recommendations for a research  
9 agenda based on appropriate and feasible interventions that could be evaluated for their  
10 effectiveness.  
11

12 Barriers and facilitators that were not addressed adequately in any of the intervention  
13 evaluations led us to draw conclusions about opportunities for new interventions and their  
14 subsequent evaluation. We have noted that several barriers to, and facilitators of, uptake of  
15 systematic reviews have received little attention. Reviews are perceived as having a limited  
16 range, a narrow focus, are poorly promoted and not updated frequently enough.<sup>10</sup> The  
17 medico-legal relevance of systematic reviews has not been highlighted sufficiently. Further  
18 work is needed to develop and evaluate interventions which modify or remove identified  
19 barriers and build on highlighted facilitators.  
20  
21

### 22 *Implications for practice*

23 This framework allows reviewers to address some of the criticisms of systematic reviews of  
24 controlled trials by taking into account the social and structural influences on their uptake.<sup>13</sup>  
25 It is important to carefully select the intervention most likely to be effective in the light of the  
26 diagnosed problem.<sup>44</sup> Choosing the right strategy is an essential component of developing  
27 evidence-based practice and ultimately improving patient care.<sup>45</sup> We need to focus more on  
28 impacting on patient satisfaction and quality of life.<sup>46</sup> Clinically integrated interventions are  
29 also required.<sup>47</sup>  
30  
31

32 Presentation is as important as results. Little attention has been paid to the format of a  
33 review.<sup>5</sup> The reviews are often technical, contain complex statistics, and are written in an  
34 academic style. The evidence suggests that systematic reviews should be presented in an  
35 easily understood way with information accessed in a graded manner. The identification of a  
36 take-home message is important.  
37  
38

39 The aim here was to place the different interventions in perspective.<sup>48</sup> It is important to  
40 consider the target audience, their values and preferences while linking the key message to  
41 the level of the decision maker's training. We should refocus efforts on improving and  
42 promoting graded access to summaries of evidence.  
43  
44

### 45 **CONCLUSION**

46 We recommend 3 interventions: tailored, targeted messaging, systematic review summaries,  
47 and educational visits. These address a range of identified factors impacting on review  
48 uptake. Other interventions, such as e-learning approaches, need to be developed further.  
49 New interventions need to be devised that build on neglected facilitators of uptake.  
50  
51

52 This review has added value compared with conventional reviews of effectiveness.<sup>13</sup> The  
53 advantage lies in the ability to examine systematically a much wider literature so to suggest  
54 recommendations for practice. A conventional review of effectiveness in this area would  
55 have been able to draw on 10 outcome evaluation reports to generate conclusions about  
56  
57  
58  
59  
60

effectiveness. We were able to draw on an additional 27 studies encompassing decision maker's views about barriers and 15 studies targeting facilitators.

We addressed not just effectiveness but also appropriateness. The approach utilized a larger proportion of research evidence relevant to the review question. The evidence synthesized here is important to a broad sweep of institutions concerned with evidence uptake in general and systematic review uptake in particular.

### **Conflict of interest: None**

There was no known conflict of interest related to or unrelated to the research.

All authors have completed the Unified Competing Interest form and declare: no support from any organisation for the submitted work, no financial relationships with any organisations that might have an interest in the submitted work in the previous three years, no other relationships or activities that could appear to have influenced the submitted work.

Additional information, including the protocol, examples of the search strategy, and risk of bias tables for each individual study and bias across groups, is available from the corresponding author at [john.wallace@wadh.oxon.org](mailto:john.wallace@wadh.oxon.org)

The authors are happy to share data.

All authors were involved in the conceptualization, conduct, preparation, and writing up of the research. All authors made a substantial contribution to the design, acquisition, analysis and interpretation of data. All were involved in the drafting and revision of the article for intellectual content and all approved the final version.

No ethical approval was required.

No funding was received or sought.

## **REFERENCES**

1. INNVAER, S., VIST, G., TROMMALD, M., OXMAN, A. Health policy-makers' perceptions of their use of evidence: a systematic review. *Journal of Health Services Research & Policy*, 2002; 7 (4):239–244.
2. MURTHY, L., SHEPPERD, S., CLARKE, M. J., GARNER, S. E., LAVIS, J. N., PERRIER, L., ROBERTS, N. W. & STRAUS, S. E. Interventions to improve the use of systematic reviews in decision-making by health system managers, policy makers and clinicians. *Cochrane Database Syst Rev*, 2012. 9,CD009401.

- 1  
2  
3 3. KNOTTNERUS, J. A. and TUGWELL, P. 'The evidence base of taming continuously  
4 proliferating evidence', *Journal of Clinical Epidemiology*, 2012. 65(12), 1241-1242.  
5
- 6 4. SACKETT, D, ROSENBERG, WC., MUIR GRAY, JA. HAYNES, R. B., and  
7 RICHARDSON, W.S. Evidence based medicine: what it is and what it isn't. *BMJ*, 1996;  
8 312:71.  
9
- 10 5. TETZLAFF, J. TRICCO, A. and MOHER, D. Knowledge Synthesis. In Straus S, Tetroe  
11 J, Graham I D, editors. *Knowledge translation in health care*. UK: Wiley-Blackwell, BMJ  
12 Books; 2009.  
13
- 14 6. DAWES, M., SAMPSON, U. Knowledge management in clinical practice: a systematic  
15 review of information seeking behavior in physicians. *Int J Med Infor* 2003 Aug; 71(1):9-  
16 15.  
17
- 18 7. LAVIS, J., DAVIES, H., OXMAN, A., DENIS, J.L., GOLDEN-BIDDLE K, and  
19 FERLIE, E. Toward systematic reviews that inform health care management. *Journal of*  
20 *Health Services Research & Policy*. 2005; 10 Suppl 1: 35-48.  
21
- 22 8. PERRIER, L., MRKLAS, K., LAVIS, J. N. and STRAUS, S. E. Interventions  
23 encouraging the use of systematic reviews by health policymakers and managers: A  
24 systematic review. *Implement Sci*, 2011. 6, 43.  
25
- 26 9. PERRIER, L., MRKLAS, K., SHEPPERD, S., DOBBINS, M., MCKIBBON, K. A. and  
27 STRAUS, S. E. Interventions encouraging the use of systematic reviews in clinical  
28 decision-making: a systematic review. *J Gen Intern Med*, 2011. 26(4), 419-26.  
29
- 30 10. WALLACE, J., NWOOSA, B., CLARKE, .J. Barriers to the uptake of evidence from  
31 systematic reviews and meta-analyses: a systematic review of decision makers'  
32 perceptions. *BMJ Open*. 2012;2:e001220 doi: 10. 1136/bmjopen-2012-001220  
33
- 34 11. WALLACE, J, BYRNE, C., CLARKE, M. Making evidence more wanted; a systematic  
35 review of facilitators to enhance the uptake of evidence from systematic reviews and  
36 meta-analyses. *Internal J Evid Based Healthcare*. 2012. 10 (4): 338-46 doi:  
37 10.1111/j.1744-1609.2012.00288.x  
38
- 39 12. POPE, C., MAYS, N., POPAY J. Synthesizing Qualitative and Quantitative Research.  
40 UK: McGraw-Hill; 2007.  
41
- 42 13. OLIVER, S, HARDEN, A, REES, R., SHEPHARD, J., BRUNTON, G., GARCIA, J., et  
43 al. An emerging framework for including different types of evidence in systematic  
44 reviews for public policy. *Evaluation*. 2005;11(4): 428-446.  
45
- 46 14. NOYES, J., POPAY, J., PEARSON, A., HANNES, K. and BOOTH, A. Qualitative  
47 Research and Cochrane Reviews, in Higgins J P and Green S, editors. *Cochrane*  
48 *Handbook for Systematic Reviews of Interventions*. Chichester, UK: John Wiley & Sons;  
49 2008.  
50  
51  
52  
53  
54  
55  
56  
57  
58  
59  
60

15. GARTLEHER, G. AND FLAMM, M. Is The Cochrane Collaboration prepared for the era of patient-centred outcomes research? *Cochrane Database Syst Rev*, 2013. 3, ED000054
16. WONG, G. GREENHALGH T, WESTTHORP PG, BUCKINGHAM J. RAMESES Publication Standards: Meta-Narrative Review. *BMC Medicine*. 2013 11, 20. DOI. 10.1186/1741-7015-11-20.
17. SHEPHERD, J., HARDEN, A., REES, R., BRUNTON, G., GARCIA, J., OLIVER, S, OAKLEY, A. Young people and healthy eating: a systematic reviews on research on barriers and facilitators. *Health Education Research*. 2005 26 Oct; 21:239-257.
18. Cochrane Effective Practice and Organisation of Care Group: Data Collection Checklist. EPOC resources for review authors Revised 2002:<http://www.epoc.cochrane.org/en/handsearchers.html>
19. CHAILLET, N., DUBE, E., DUGAS, M., AUDIBERT, F., TOURIGNY, C., FRAZER, W. D. and DUMONT, A. Evidence-based strategies for implementing guidelines in obstetrics: a systematic review. *Obstet Gynecol*, 2006. 108(5), 1234-45.
20. JOLY, A., NGUENG FEZE, I. and SIMARD, J. Genetic discrimination and life insurance: a systematic review, *BMC Medicine*, 2013 11:25
21. GROL, R. and GRIMSHAW, J. From best evidence to best practice: effective implementation of change in patients' care. *Lancet*, 2003, 362(9391), 1225-30.
22. BAKER, R., CAMOSSO-STEFINOVIC, J., GILLIES, C., SHAW, EJ, CHEATER, J, FLOTTORP, S, ROBERTSON, N. Tailored interventions to overcome identified barriers to change: effects on professional practice and health care outcomes. *Cochrane Database of Systematic Reviews*. 2010, Issue 3. Art. No.: CD005470. DOI: 10.1002/14651858.CD005470.pub2
23. ANGLIN, R. E., SAMAAAN, Z., WALTER, S. D. and MCCDONALD, S. D. Vitamin D deficiency and depression in adults: systematic review and meta-analysis. *Br J Psychiatry*, 2013 202, 100-7.
24. THOMAS, J., HARDEN, A., OAKLEY, A, OLIVER, S., SUTCLIFFE, R., REES, R., BRUNTON, G., KAVANAGH, J. Integrating qualitative research with trials in systematic reviews. *BMJ*, 2004; 328:1010.
25. BRUNTON, G., HARDEN, A., REES, R, KAVANAGH, J, OLIVER, S, OAKLEY, A. Children and Physical Activity: A Systematic Review of Barriers and Facilitators. London: EPPI-Centre, Social Science Research Unit, Institute of Education, University of London: 2003.
26. REES, R., Harden J, Shepherd G, Brunton S, Oliver, Oakley A. Young people and physical activity: a systematic review of barriers and facilitators. London:EPPI-Centre, Social Science Research Centre: 2001.

- 1  
2  
3 27. HARDEN, A., REES, J., SHEPHERD, G., BRUNTON, S., OLIVER, S., Oakley A.  
4 Young people and mental health: a systematic reviews of barriers and facilitators.  
5 London:EPPI-Centre, Social Science Research Centre: 2001.  
6  
7  
8 28. WYATT, J., PATERSON-BROWN, S., JOHANSON, R., ALTAMN, D, BRADBURN,  
9 M., FISK, N. Randomized trial of educational visits to enhance use of systematic reviews  
10 in 25 obstetric units. *BMJ*. 1998; 317:1041-6.  
11  
12 29. OERMANN, M., ROOP, J., NORDSTROM, C., GALVIN, E., FLOYD, J. Effectiveness  
13 of an intervention for disseminating Cochrane reviews to nurses. *MEDSURG Nursing*,  
14 2007 Dec; 16:6.  
15  
16 30. GULMEZOGLU, AM, LNAGER, A., PIAGGO, G., LUMBIGANON P, VILLAR, J.,  
17 GRIMSHAW, J. Cluster randomised trial of an active multi-faceted educational  
18 intervention based on the WHO Reproductive Health Library to improve obstetric  
19 practices. *BJOG*, 2007; 114:16-23.  
20  
21 31. HARRIS, M., SMITH, B J, VEALE, A., ESTERMANN, A F, SELIM, P. Treatments: a  
22 controlled trial of outcomes. Providing patients with reviews of evidence about COPD.  
23 *Chronic Respiratory Disease*. 2006; 3:133.  
24  
25 32. KULIER, R., COPPUS. S., ZAMORA, J., HADLEY, J., MALICK, S., DAS, K.,  
26 WEINBRENNER, S., MEYERROSE, B., et al. The effectiveness of a clinically  
27 integrated e-learning course in evidence-ased medicine: A cluster randomised controlled  
28 trial. *BMC Medical Education*. 2009; 9:21.  
29  
30 33. DOBBINS, M., HANNA, S., CILISKA, D., MANSKE, S., CAMERON, R., MERCER,  
31 S. O'MARA, L., DECORBY, K., ROBESON, P. A randomized controlled trial evaluating  
32 the impact of knowledge translation and exchange strategies. *Implementation Science*.  
33 2009; 4:61.  
34  
35 34. KULIER, R., HADLEY, J., WEINBRENNER, S., MEYERROSE, B., DECSI, T.,  
36 HORVATH, A., et al. Harmonising Evidence-based medicine teaching: a study of the  
37 outcomes of e-learning in five European countries. *BMC Medical Education*. 2008; 8:27.  
38  
39 35. HADLEY, J., KULIER, R., ZAMORA, J., COPPIUS, S., WEINBRENNER, S.,  
40 MEYERROSE, B. Effectiveness of an e-learning course in evidence-based medicine for  
41 foundation (internship) training. *J R Soc Med*. 2010 July 1; 103(7):288–294.  
42  
43 36. DAVIS, J., CRABB, S., ROGER, E., ZAMORA, J., KHAN, K. Computer-based teaching  
44 is as good as face to face lecture-based teaching of evidence based medicine: a  
45 randomized controlled trial. *Medical Teacher*. 2008;30:302-307.  
46  
47 37. DAVIS, J, CHYSSAFIDOU, E., ZAMORA J, DAVIES, D, KHAN, K.  
48 COOMARASAMY, A. Computer-based teaching is as good as face to face lecture-based  
49 teaching of evidence based medicine: a randomised controlled trial. *BMC Med Educ*.  
50 2007; 7:23.  
51  
52  
53  
54  
55  
56  
57  
58  
59  
60

- 1  
2  
3 38. BURTON, L. J., TYSON, S. and MCGOVERN, A. Staff perceptions of using outcome  
4 measures in stroke rehabilitation. *Disabil Rehabil.* 2013, 35, 828-34.  
5  
6  
7 39. LAWRENCE V, FOSSEY J, BALLARD C, MONIZ-COOK E, MURRAY J. Improving  
8 quality of life for people with dementia: making psycho-social interventions work. *BJP.*  
9 2012. 201:344-351.  
10  
11 40. VAN OORT, L., VAN DEN BERG, T., KOES, B. W., DE VET, R. H., ANEMA, H. J.,  
12 HEYMANS, M. W. & VERHAGEN, A. P. Preliminary state of development of  
13 prediction models for primary care physical therapy: a systematic review. *J Clin*  
14 *Epidemiol*, 2012. 65, 1257-66.  
15  
16  
17 41. MATSON, J. Narrative overview of systematic reviews and meta-analyses: evidence on  
18 many treatments for psychopathology in people with developmental disabilities is  
19 limited. *Evid Based Ment Health*, 2013.16, 44.  
20  
21  
22 42. STEWART, C. G., OMAR, O., MILENSU, S. & LY-MEE, Y. A systematic review finds  
23 that prediction models for chronic kidney were poorly reported and often developed using  
24 inappropriate methods. *Journal of clinical epidemiology*, 2013. In press.  
25  
26  
27 43. OXMAN, D., THOMSON, MA, DAVIS, D, HAYNES B. No magic bullets: a systematic  
28 review of 102 trials of interventions to improve professional practice. *Can Med Assoc.*  
29 1995 Nov 15; 153(10):1423-1431.  
30  
31  
32 44. EASTMAN, G., O'CONNELL, B., and GARDNER, A. Selecting the right integration of  
33 research into practice strategy. *J Nurs Care Qual.* 2008; 23(2):258-264.  
34  
35  
36 45. NABULSI, M., HARRIS, J., LETELIER, L., RAMOS K, HOPAYIAN, K., PARKIN, C,  
37 PORZSOLT, F., SESTINI, P., Et al. Effectiveness of education in evidence-based  
38 healthcare: the current state of outcome assessments and a framework for future  
39 developments. *International Journal of Evidence-based Healthcare.* 2007 Dec, 5(4):468-  
40 476.  
41  
42  
43 46. COOMARY, A., KHAN, K. What is the evidence that postgraduate teaching in evidence  
44 based medicine changes anything? A systematic review. *BMJ* 2004 Oct. 329:1017.  
45  
46  
47 47. MCCOLL, A., SMITH, H., WHITE, P. and FIELD, J. General practitioner's perceptions  
48 of the route to evidence based medicine: a questionnaire survey. *BMJ* 1998 316(7128),  
49 361-5.  
50  
51  
52 48. LEUCHT, S., HIERL, S., KISSLING, W., DOLD, M. and DAVIS, J. M. Putting the  
53 efficacy of psychiatric and general medicine medication into perspective: review of meta-  
54 analyses, *Br J Psychiatry*, 2012. 200(2), 97-106.  
55  
56

57 **Table I. Characteristics of included studies (n=10)**  
58  
59  
60

| Study Location Design                                                                                   | Strategy Participants Setting                                                                                                                        | Description                                                                                                                                                                                                     |
|---------------------------------------------------------------------------------------------------------|------------------------------------------------------------------------------------------------------------------------------------------------------|-----------------------------------------------------------------------------------------------------------------------------------------------------------------------------------------------------------------|
| Wyatt et al. 1996 <sup>28</sup><br>UK<br>RCT                                                            | Educational visit to obstetricians and midwives in 25 district obstetric units                                                                       | Educational visit (single) by a respected obstetrician advancing general ways to apply evidence from Cochrane reviews with The Cochrane database donated. Visit to lead obstetrician and midwife on labour ward |
| Gulmezoglu et al. 2006 <sup>30</sup><br>Mexico, Thailand<br>Cluster randomized trial                    | Multi-faceted intervention: interactive workshops in 40 maternity units in non-academic hospitals including doctors, midwives, interns, and students | 3 interactive workshops using RHL over 6 months, focusing on access and use with the focus on the RHL contents in general.                                                                                      |
| Harris et al. 2006 <sup>31</sup><br>Australia<br>Controlled clinical trial.                             | Patient manual to doctor's patients in 3 hospitals                                                                                                   | Patient manual of summaries of Cochrane reviews: 80 page, A5 size manual with 22 summaries of evidence organised into easy to find sections                                                                     |
| Oermann et al. 2007 <sup>29</sup><br>USA<br>RCT                                                         | Short summary of systematic review to fifty nurses in medical and surgical units in seven hospitals                                                  | Four short, one-page systematic review summaries delivered by e-mail or mail, on patient-controlled analgesia                                                                                                   |
| Davis et al. 2007 <sup>37</sup><br>UK<br>RTC                                                            | Computer-based session newly qualified medical doctors in 6 post-graduate centres                                                                    | CD ROM sessions, 40 minutes duration, emphasizing critical and application of systematic reviews and meta-analyses.                                                                                             |
| Kulier et al. 2008 <sup>34</sup><br>Before-and after-design<br>Germany, Hungary, Spain, Switzerland, UK | E-learning course to post-graduate medical trainees from different specialities in primary and secondary care                                        | 3 e-learning modules focusing on systematic reviews, with unlimited access over 6 weeks                                                                                                                         |

|                                                                                                                                                                                                                |                                                                      |                                                                                                                                                                  |                                                                                                                                                                                       |
|----------------------------------------------------------------------------------------------------------------------------------------------------------------------------------------------------------------|----------------------------------------------------------------------|------------------------------------------------------------------------------------------------------------------------------------------------------------------|---------------------------------------------------------------------------------------------------------------------------------------------------------------------------------------|
| 1<br>2<br>3<br>4<br>5<br>6<br>7<br>8<br>9                                                                                                                                                                      | Davis et al. 2008 <sup>36</sup><br>UK<br>RCT                         | Computer-based session for medical undergraduates in a medical school setting                                                                                    | 1 computer (CD-ROM) session focusing on systematic reviews and meta- analyses with a standardised structure of 40 minutes                                                             |
| 10<br>11<br>12<br>13<br>14<br>15                                                                                                                                                                               | Kulier et al. 2009 <sup>32</sup><br>Netherlands<br>UK<br>Cluster RCT | E-learning course for postgraduate trainees in 6 obstetrics and gynaecology departments                                                                          | 5 e-learning modules focusing on systematic reviews, over 5 weeks with on the job training, self-directed learning                                                                    |
| 16<br>17<br>18<br>19<br>20<br>21<br>22<br>23<br>24<br>25                                                                                                                                                       | Dobbins et al. 2009 <sup>33</sup><br>Canada<br>RCT                   | Tailored, targeted messaging, on-line registry, knowledge broker to 108 health departments: programme managers, programme coordinators, and programme directors. | Messages from 7 rigorous systematic reviews. A series of e-mails with link to full reference, abstract and summary. Also a visit from knowledge broker and access an on-line registry |
| 26<br>27<br>28<br>29<br>30<br>31<br>32<br>33<br>34<br>35<br>36<br>37<br>38<br>39<br>40<br>41<br>42<br>43<br>44<br>45<br>46<br>47<br>48<br>49<br>50<br>51<br>52<br>53<br>54<br>55<br>56<br>57<br>58<br>59<br>60 | Hadley et al. 2010 <sup>35</sup><br>UK<br>Cluster RCT                | E-learning course focusing on systematic reviews with post-graduate doctors at internship level in 7 teaching hospitals                                          | Clinically integrated e-learning EBM course 3 modules involving critical appraisal of systematic reviews, unlimited access over 6 weeks                                               |



**Table 2.** PubMed was searched from January 2011 to January 2014 using the advanced search facility

| Search | Query                                                                    | Items found |
|--------|--------------------------------------------------------------------------|-------------|
| 1      | systematic review AND facilitators AND knowledge uptake                  | 3           |
| 2      | meta-analysis AND facilitators AND knowledge uptake                      | 3           |
| 3      | systematic review AND enhance* AND knowledge uptake                      | 143         |
| 4      | meta-analysis AND enhance* AND knowledge uptake                          | 4           |
| 5      | systematic review AND facilitator* AND knowledge utilisation             | 0           |
| 6      | meta-analysis AND facilitator* and knowledge utilisation                 | 0           |
| 7      | systematic review AND improve* AND knowledge utilisation                 | 18          |
| 8      | meta-analysis AND improve* AND knowledge utilisation                     | 4           |
| 9      | overview* OR review* AND intervention AND knowledge translation          | 156         |
| 10     | systematic review* OR meta-analys* AND intervention* AND evidence uptake | 56          |

387 citations were returned by PubMed but no further relevant studies were identified

**Table 3. Risk of bias assessment and results of intervention studies**

| Study                                | Risk of Bias | Primary Measures                                                                                                                                                                                                                                                                                                                          | Outcome                                                                                                                                                                                                                            | Authors' Conclusions                                                                                                   |
|--------------------------------------|--------------|-------------------------------------------------------------------------------------------------------------------------------------------------------------------------------------------------------------------------------------------------------------------------------------------------------------------------------------------|------------------------------------------------------------------------------------------------------------------------------------------------------------------------------------------------------------------------------------|------------------------------------------------------------------------------------------------------------------------|
| Wyatt et al. 1997 <sup>28</sup>      | Low          | Ventouse usage. Steroid usage. Suture usage. Antibiotics usage and concordance of guidelines with systematic review                                                                                                                                                                                                                       | Overall baseline rate increased from 43% to 54%. Only one clinical practice improved significantly                                                                                                                                 | Educational visits added little to uptake of systematic review evidence. Significant change in ventouse delivery only. |
| Oermann et al. 2007 <sup>29</sup>    | Low          | Awareness, understanding, usefulness, and preferred mode of delivery of reviews.                                                                                                                                                                                                                                                          | Awareness improved significantly (p=0.001). Understanding improved non-significantly                                                                                                                                               | Short summaries of systematic reviews improve awareness of review evidence.                                            |
| Dobbins et al. 2009 <sup>33</sup>    | Low          | Use in a program decisions and change in healthy body weight promotion policies.                                                                                                                                                                                                                                                          | No significant effect for primary outcome (p=0.45). For policies, a significant effect for targeted, tailored messages (p<0.01). All groups improved.                                                                              | Targeted, tailored, messages are more effective than knowledge brokering and online registry.                          |
| Gulmezoglu et al. 2006 <sup>30</sup> | Mod          | Social support in labour<br>MgSO <sub>4</sub> for eclampsia.<br>Corticosteroids-preterm<br>Selective episiotomy.<br>Uterotonic use after birth.<br>Breastfeeding on demand.<br>External cephalic version.<br>Iron/folate supplementation.<br>Antibiotic use at CS. Vacuum extraction for assisted birth.<br>Knowledge of RHL. Use of RHL. | No consistent/substantive changes in 10 clinical practices. RHL awareness (24.8%-65.5% in Mexico, 33.9-83.3% in Thailand) and use (4.8-34.9% in Mexico and 15.5-76.4% in Thailand) increased substantially after the intervention. | Results were negative regarding practices targeted, but there was increased awareness, use of RHL.                     |
| Harris et al. 2006 <sup>31</sup>     | Mod          | Rates of flu vaccination, bone density testing, increased satisfaction, improved communication, reduced anxiety, improved quality of life.                                                                                                                                                                                                | No pattern of statistically benefit in primary or secondary outcome measures but virtually all trends favoured the intervention group. High levels of use, little impact on clinical practice.                                     | Advantages for the intervention were seen as trends.                                                                   |
| Davis et al.                         | Mod          | Knowledge gain, attitude gain                                                                                                                                                                                                                                                                                                             | Similar results for attitude and knowledge                                                                                                                                                                                         | Computer-based teaching as                                                                                             |

|    |                    |      |                         |                              |                       |
|----|--------------------|------|-------------------------|------------------------------|-----------------------|
| 1  |                    |      |                         |                              |                       |
| 2  |                    |      |                         |                              |                       |
| 3  | 2007 <sup>37</sup> |      |                         |                              | effective as lecture- |
| 4  |                    |      |                         |                              | based.                |
| 5  |                    |      |                         |                              |                       |
| 6  |                    |      |                         |                              |                       |
| 7  |                    |      |                         |                              |                       |
| 8  |                    |      |                         |                              |                       |
| 9  | Kulier et          | High | Change in knowledge and | On average, knowledge        | E-learning about      |
| 10 | al.                |      | attitude scores.        | scores improved              | systematic reviews    |
| 11 | 2008 <sup>34</sup> |      |                         | significantly (p<0.001).     | can be harmonised     |
| 12 |                    |      |                         | Attitudinal gains on two     | across different      |
| 13 |                    |      |                         | questions only (p=0.00,      | languages and         |
| 14 |                    |      |                         | p=0.007).                    | specialities.         |
| 15 |                    |      |                         |                              |                       |
| 16 |                    |      |                         |                              |                       |
| 17 |                    |      |                         |                              |                       |
| 18 | Davis et           | Mod  | Knowledge gain          | Difference between           | Computer-based        |
| 19 | al.                |      | Attitude gain           | groups: -0.5 (95% CI -1.3,   | teaching and          |
| 20 | 2008 <sup>36</sup> |      |                         | 0.3: p=0.24).                | typical lectures      |
| 21 |                    |      |                         |                              | have similar gains    |
| 22 |                    |      |                         |                              | in knowledge and      |
| 23 |                    |      |                         |                              | attitude.             |
| 24 |                    |      |                         |                              |                       |
| 25 |                    |      |                         |                              |                       |
| 26 | Kulier et          | Mod  | Change in knowledge and | The intervention group       | Both groups had an    |
| 27 | al.                |      | attitude scores         | outperformed by control      | improvement in        |
| 28 | 2009 <sup>32</sup> |      |                         | group by 3.5 points (95%     | attitude and          |
| 29 |                    |      |                         | CI: -2.7, 9.8) for knowledge | knowledge but the     |
| 30 |                    |      |                         | gain: not statistically      | intervention group    |
| 31 |                    |      |                         | significant.                 | had a tendency to     |
| 32 |                    |      |                         |                              | better                |
| 33 |                    |      |                         |                              | performance.          |
| 34 |                    |      |                         |                              |                       |
| 35 |                    |      |                         |                              |                       |
| 36 |                    |      |                         |                              |                       |
| 37 |                    |      |                         |                              |                       |
| 38 |                    |      |                         |                              |                       |
| 39 | Hadley et          | High | Knowledge gain          | Adjusted post-course         | E-learning and        |
| 40 | al.                |      |                         | difference: only 0.1 scoring | standard              |
| 41 | 2010 <sup>35</sup> |      |                         | points (95% CI 1.2, 1.4)     | classroom-based       |
| 42 |                    |      |                         | between groups: no           | teaching both         |
| 43 |                    |      |                         | difference in improvement    | improve               |
| 44 |                    |      |                         | in knowledge between         | knowledge.            |
| 45 |                    |      |                         | groups.                      |                       |
| 46 |                    |      |                         |                              |                       |
| 47 |                    |      |                         |                              |                       |
| 48 |                    |      |                         |                              |                       |
| 49 |                    |      |                         |                              |                       |
| 50 |                    |      |                         |                              |                       |
| 51 |                    |      |                         |                              |                       |
| 52 |                    |      |                         |                              |                       |
| 53 |                    |      |                         |                              |                       |
| 54 |                    |      |                         |                              |                       |
| 55 |                    |      |                         |                              |                       |
| 56 |                    |      |                         |                              |                       |
| 57 |                    |      |                         |                              |                       |
| 58 |                    |      |                         |                              |                       |
| 59 |                    |      |                         |                              |                       |
| 60 |                    |      |                         |                              |                       |

**Table 4. Synthesis Matrix juxtaposing Interventions, Barriers and Facilitators**

| Interventions                                                                                                                         | Barriers addressed                                                                                                                                                                                                             | Facilitators addressed                                                                                                                                                                |
|---------------------------------------------------------------------------------------------------------------------------------------|--------------------------------------------------------------------------------------------------------------------------------------------------------------------------------------------------------------------------------|---------------------------------------------------------------------------------------------------------------------------------------------------------------------------------------|
| <b>Tailored, targeted messaging</b><br>Dobbins et al. 2009 <sup>33</sup>                                                              | Lack of access<br>Lack of awareness<br>Lack of familiarity                                                                                                                                                                     | A graded format<br>Delivery: Web-based<br>Consistent presentation<br>Increased access                                                                                                 |
| <b>Educational visits</b><br>Wyatt et al. 1998 <sup>28</sup>                                                                          | Lack of use<br>Lack of awareness<br>Lack of access<br>Lack of familiarity<br>Lack of usefulness<br>Lack of motivation<br>External barriers                                                                                     | Usefulness<br>Training<br>Peer-group support<br>Delivery: CD ROM<br>Perceived ease of use<br>Position in an organisation<br>Organisational value<br>Motivation, Increased access,     |
| <b>Brief summaries</b><br>Oermann et al 2007 <sup>29</sup>                                                                            | Lack of awareness<br>Lack of access<br>Lack of familiarity<br>Lack of usefulness<br>External barriers<br>Lack of relevance<br>Ignore target audience                                                                           | Usefulness<br>Highlighted content<br>A graded format<br>Delivery: Web-based<br>Position in an organisation<br>Increased access                                                        |
| <b>Multi-faceted educational intervention</b><br>Gulmezoglu et al. 2006 <sup>30</sup>                                                 | Lack of use<br>Lack of awareness<br>Lack of access<br>Lack of familiarity<br>Lack of usefulness<br>Lack of motivation<br>External barriers<br>Lack of relevance<br>Lack of implementation strategies<br>Ignore target audience | Training<br>Peer-group support<br>Delivery: Web-based<br>Organisational value<br>Motivation<br>Increased access<br>Familiarity with computers                                         |
| <b>Manual of Cochrane Reviews</b><br>Harris et al. 2006 <sup>31</sup>                                                                 | Lack of use<br>Lack of awareness<br>Lack of access<br>Lack of familiarity<br>Lack of usefulness<br>External barriers<br>Lack of relevance<br>Ignore target audience<br>Lack of implementation strategies                       | Usefulness<br>Highlighted content<br>Format: summaries<br>Delivery: paper-based<br>Ability to improve confidence<br>Position in an organisation<br>Motivation<br>Increased access     |
| <b>E- learning course</b><br>Kulier et al. 2009 <sup>32</sup><br>Kulier et al. 2008 <sup>34</sup><br>Hadley et al. 2010 <sup>35</sup> | Lack of use<br>Lack of awareness<br>Lack of access<br>Lack of familiarity<br>Lack of usefulness<br>External barriers<br>Lack of relevance<br>Lack of implications<br>Ignore target audience                                    | Usefulness<br>Training<br>Peer-group support<br>Delivery: Web-based<br>Position in an organisation<br>Motivation<br>Increased access<br>Increased confidence<br>Organisational values |

|                                        | Lack of implementation strategies |                             |
|----------------------------------------|-----------------------------------|-----------------------------|
| <b>Access to online registry</b>       | Lack of awareness                 | Delivery: Web-based         |
| Dobbins et al. 2009 <sup>33</sup>      | Lack of access                    | Increased access            |
| <b>Knowledge brokers</b>               | Lack of awareness                 | Usefulness                  |
| Dobbins et al. 2009 <sup>33</sup>      | Lack of access                    | Graded format               |
|                                        | Lack of familiarity               | Training                    |
|                                        | Lack of usefulness                | Peer-group support          |
|                                        | Lack of use                       | Delivery: Web-based         |
|                                        | Lack of relevance                 | Consistent presentation     |
|                                        | Lack of implications for practice | Position in an organisation |
|                                        | Lack of implementation strategies | Organisational value        |
|                                        | Ignore target audience            | Increased access            |
|                                        | Lack of workshop attendance       |                             |
|                                        | Lack of positive climate          |                             |
| <b>Computer-based (CD-ROM) session</b> | Lack of use                       | Usefulness                  |
| Davis et al. 2008 <sup>36</sup>        | Lack of awareness                 | Training                    |
| Davis et al. 2007 <sup>29</sup>        | Lack of access                    | Peer-group support          |
|                                        | Lack of familiarity               | Delivery: CD ROM            |
|                                        | Lack of usefulness                | Position in an organisation |
|                                        | External barriers                 | Organisational value        |
|                                        | Lack of implications for practice | Increased access            |
|                                        | Lack of implementation strategies | Familiarity (computers)     |
|                                        | Ignore target audience            |                             |

## Supplementary file

**Studies that might be expected to meet criteria for inclusion in the review but did not**

DOBBINS, M., CILISKA, D., COCKERILL, R., BARNSLEY, J. & DICENSO, A., 2002. A framework for the dissemination and utilization of research for health-care policy and practice. *The Online Journal of Knowledge Synthesis for Nursing*, 9, 7. Not a survey, focus group or interview study, or an intervention.

GLASZIOU, P., GUYATT, G. H., DANS, A. L., DANS, L. F., STRAUS, S. & SACKETT, D. L. 1998. Applying the results of trials and systematic reviews to individual patients. *ACP Journal Club*, 129, A15-6. Not a survey, focus group or interview study, or an intervention.

GRIMSHAW, J. M., SANTESSO, N., CUMPSTON, M., MAYHEW, A. and MCGOWAN, J. 2006. Knowledge for knowledge translation: the role of the Cochrane Collaboration., *Journal of Continuing Education in the Health Professions*, 26, 55-62. Not a survey, focus group or interview study, or an intervention.

GRUEN, R. L., MORRIS, P. S., MCDONALD, E. L. and BAILIE, R. S., 2005. Making systematic reviews more useful for policy-makers. *Bulletin of the World Health Organisation*, 83, 480. A letter/essay.

LAVIS, J. N., 2006. Research, public policymaking, and knowledge-translation processes: Canadian efforts to build bridges. *Journal of Continuing Education in the Health Professions*, 26, 37-45. Not a survey, focus group or interview, or an intervention.

PETTICREW, M., WHITEHEAD, M., MACINTYRE, S. J., GRAHAM, H. & EGAN, M. 2004. Evidence for public health policy on inequalities: 1: the reality according to policymakers. *Journal of Epidemiology and Community Health*, 58, 811-6. Not specifically related to systematic reviews.

SILAGY, C. A., WELLER, D. P., MIDDLETON, P. F. and DOUST, J. A., 1999. General practitioners' use of evidence databases. *Medical Journal of Australia*, 170, 393. A comment on previous studies.

SHELDON, T. A., 2005. Making evidence synthesis more useful for management and policy-making. *Journal of Health Service and Research Policy*, 10 Suppl 1, 1-5. An essay, not a survey, focus group, or an interview, or an intervention.

VOLMINK, J., SIEGFRIED, N., ROBERTSON, K. and GÜLMEZOGLU, A. M., 2004. Research synthesis and dissemination as a bridge to knowledge management: the Cochrane Collaboration. *Bulletin of the World Health Organisation*, 82, 778-83. An essay. Not a survey, a focus group, an interview, or an intervention.

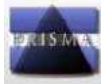

# PRISMA 2009 Checklist

1  
2  
3  
4  
5  
6  
7  
8  
9  
10  
11  
12  
13  
14  
15  
16  
17  
18  
19  
20  
21  
22  
23  
24  
25  
26  
27  
28  
29  
30  
31  
32  
33  
34  
35  
36  
37  
38  
39  
40  
41  
42  
43  
44  
45  
46  
47  
48  
49

| Section/topic                      | #  | Checklist item                                                                                                                                                                                                                                                                                              | Reported on page # |
|------------------------------------|----|-------------------------------------------------------------------------------------------------------------------------------------------------------------------------------------------------------------------------------------------------------------------------------------------------------------|--------------------|
| <b>TITLE</b>                       |    |                                                                                                                                                                                                                                                                                                             |                    |
| Title                              | 1  | Identify the report as a systematic review, meta-analysis, or both.                                                                                                                                                                                                                                         | 1                  |
| <b>ABSTRACT</b>                    |    |                                                                                                                                                                                                                                                                                                             |                    |
| Structured summary                 | 2  | Provide a structured summary including, as applicable: background; objectives; data sources; study eligibility criteria, participants, and interventions; study appraisal and synthesis methods; results; limitations; conclusions and implications of key findings; systematic review registration number. | 1                  |
| <b>INTRODUCTION</b>                |    |                                                                                                                                                                                                                                                                                                             |                    |
| Rationale                          | 3  | Describe the rationale for the review in the context of what is already known.                                                                                                                                                                                                                              | 2                  |
| Objectives                         | 4  | Provide an explicit statement of questions being addressed with reference to participants, interventions, comparisons, outcomes, and study design (PICOS).                                                                                                                                                  | 2                  |
| <b>METHODS</b>                     |    |                                                                                                                                                                                                                                                                                                             |                    |
| Protocol and registration          | 5  | Indicate if a review protocol exists, if and where it can be accessed (e.g., Web address), and, if available, provide registration information including registration number.                                                                                                                               | 22                 |
| Eligibility criteria               | 6  | Specify study characteristics (e.g., PICOS, length of follow-up) and report characteristics (e.g., years considered, language, publication status) used as criteria for eligibility, giving rationale.                                                                                                      | 3                  |
| Information sources                | 7  | Describe all information sources (e.g., databases with dates of coverage, contact with study authors to identify additional studies) in the search and date last searched.                                                                                                                                  | 3                  |
| Search                             | 8  | Present full electronic search strategy for at least one database, including any limits used, such that it could be repeated.                                                                                                                                                                               | 20                 |
| Study selection                    | 9  | State the process for selecting studies (i.e., screening, eligibility, included in systematic review, and, if applicable, included in the meta-analysis).                                                                                                                                                   | 3                  |
| Data collection process            | 10 | Describe method of data extraction from reports (e.g., piloted forms, independently, in duplicate) and any processes for obtaining and confirming data from investigators.                                                                                                                                  | 3                  |
| Data items                         | 11 | List and define all variables for which data were sought (e.g., PICOS, funding sources) and any assumptions and simplifications made.                                                                                                                                                                       | 4                  |
| Risk of bias in individual studies | 12 | Describe methods used for assessing risk of bias of individual studies (including specification of whether this was done at the study or outcome level), and how this information is to be used in any data synthesis.                                                                                      | 4                  |
| Summary measures                   | 13 | State the principal summary measures (e.g., risk ratio, difference in means).                                                                                                                                                                                                                               | 4                  |
| Synthesis of results               | 14 | Describe the methods of handling data and combining results of studies, if done, including measures of consistency (e.g., $I^2$ for each meta-analysis).                                                                                                                                                    | 4                  |

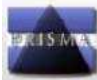

# PRISMA 2009 Checklist

1  
2  
3  
4  
5  
6  
7  
8  
9  
10  
11  
12  
13  
14  
15  
16  
17  
18  
19  
20  
21  
22  
23  
24  
25  
26  
27  
28  
29  
30  
31  
32  
33  
34  
35  
36  
37  
38  
39  
40  
41  
42  
43  
44  
45  
46  
47  
48  
49

| Section/topic                 | #  | Checklist item                                                                                                                                                                                           | Reported on page # |
|-------------------------------|----|----------------------------------------------------------------------------------------------------------------------------------------------------------------------------------------------------------|--------------------|
| Risk of bias across studies   | 15 | Specify any assessment of risk of bias that may affect the cumulative evidence (e.g., publication bias, selective reporting within studies).                                                             | 4                  |
| Additional analyses           | 16 | Describe methods of additional analyses (e.g., sensitivity or subgroup analyses, meta-regression), if done, indicating which were pre-specified.                                                         | 4                  |
| <b>RESULTS</b>                |    |                                                                                                                                                                                                          |                    |
| Study selection               | 17 | Give numbers of studies screened, assessed for eligibility, and included in the review, with reasons for exclusions at each stage, ideally with a flow diagram.                                          | 5                  |
| Study characteristics         | 18 | For each study, present characteristics for which data were extracted (e.g., study size, PICOS, follow-up period) and provide the citations.                                                             | 7                  |
| Risk of bias within studies   | 19 | Present data on risk of bias of each study and, if available, any outcome level assessment (see item 12).                                                                                                | 7                  |
| Results of individual studies | 20 | For all outcomes considered (benefits or harms), present, for each study: (a) simple summary data for each intervention group (b) effect estimates and confidence intervals, ideally with a forest plot. | 7                  |
| Synthesis of results          | 21 | Present results of each meta-analysis done, including confidence intervals and measures of consistency.                                                                                                  | 8                  |
| Risk of bias across studies   | 22 | Present results of any assessment of risk of bias across studies (see Item 15).                                                                                                                          | 8                  |
| Additional analysis           | 23 | Give results of additional analyses, if done (e.g., sensitivity or subgroup analyses, meta-regression [see Item 16]).                                                                                    | 9                  |
| <b>DISCUSSION</b>             |    |                                                                                                                                                                                                          |                    |
| Summary of evidence           | 24 | Summarize the main findings including the strength of evidence for each main outcome; consider their relevance to key groups (e.g., healthcare providers, users, and policy makers).                     | 11                 |
| Limitations                   | 25 | Discuss limitations at study and outcome level (e.g., risk of bias), and at review-level (e.g., incomplete retrieval of identified research, reporting bias).                                            | 11                 |
| Conclusions                   | 26 | Provide a general interpretation of the results in the context of other evidence, and implications for future research.                                                                                  | 12                 |
| <b>FUNDING</b>                |    |                                                                                                                                                                                                          |                    |
| Funding                       | 27 | Describe sources of funding for the systematic review and other support (e.g., supply of data); role of funders for the systematic review.                                                               | 22                 |

From: Moher D, Liberati A, Tetzlaff J, Altman DG, The PRISMA Group (2009). Preferred Reporting Items for Systematic Reviews and Meta-Analyses: The PRISMA Statement. PLoS Med 6(6): e1000097. doi:10.1371/journal.pmed1000097

For more information, visit: [www.prisma-statement.org](http://www.prisma-statement.org).



## IMPROVING THE UPTAKE OF SYSTEMATIC REVIEWS: A SYSTEMATIC REVIEW OF INTERVENTION EFFECTIVENESS AND RELEVANCE

Dr John Wallace, PhD reader, Dept of Continuing Education, Rewley House, Wellington Square, Oxford OX1 2JA, UK, john.wallace@wadh.oxon.org, Tel: 00353 682694883, Fax: 00353 906627271

Dr Charles Byrne, Dept of Psychiatry, Roscommon County Hospital, Roscommon, Ireland  
Professor Mike Clarke, Dept of Continuing Education, Rewley House, Wellington Square, Oxford, UK.

Key words: Evidence-based medicine, knowledge translation, quantitative research, qualitative research, mixed-methods research

Word count: 4,668

All authors were involved in the conceptualization, conduct, preparation, and writing up of the research. All authors made a substantial contribution to the design, acquisition, analysis and interpretation of data. All were involved in the drafting and revision of the article for intellectual content and all approved the final version.

### ABSTRACT

**Objective:** Little is known about the barriers, facilitators and interventions that impact on systematic review uptake. The objective of this study was to identify how uptake of systematic reviews can be improved.

**Selection criteria:** Studies were included if they addressed interventions enhancing the uptake of systematic reviews. Reports in any language were included. All decision makers were eligible. Studies could be randomised trials, cluster-randomised trials, controlled-clinical trials and before-and-after studies.

**Data sources:** We searched 19 databases including PubMed, Embase and The Cochrane Library, covering the full range of publication years from inception to December 2010. Two reviewers independently extracted data and assessed quality according to the Effective Practice and Organisation of Care criteria.

**Results:** Ten studies from 11 countries, containing 12 interventions met our criteria. Settings included a hospital, a government department and a medical school. Doctors, nurses, midwives, patients and programme managers were targeted. Six of the studies were geared to improving knowledge and attitudes while four targeted clinical practice.

**Synthesis of results:** Three studies of low-to-moderate risk of bias, identified interventions that showed a statistically significant improvement: educational visits, short summaries of systematic reviews, and targeted messaging. Promising interventions include e-learning, computer-based learning, inactive workshops, use of knowledge brokers, and an e-registry of reviews. Juxtaposing barriers and facilitators alongside the identified interventions, it was clear that the three effective approaches addressed a wide range of barriers and facilitators.

**Discussion:** A limited number of studies were found for inclusion. However, the extensive literature search is one of the strengths of this review.

Conclusion: Targeted messaging, educational visits, and summaries are recommended to enhance systematic review uptake. Identified promising approaches need to be developed further. New strategies are required to encompass neglected barriers and facilitators. This review addressed effectiveness and also appropriateness of knowledge uptake strategies.

## ARTICLE SUMMARY

### Article focus

What interventions improve the uptake of systematic reviews and meta-analyses?  
What barriers are overcome and what facilitators are built on by the various interventions?  
What interventions can be recommended and what strategies are promising for enhanced systematic review uptake?

### Key messages

Tailored messaging, educational visits and summaries are recommended to improve uptake of systematic reviews  
Interactive workshops, e-learning programmes and computer-based approaches are promising  
New strategies should be designed to address identified but neglected barriers and facilitators.

### Strengths and limitations

Strengths included an extensive search of 19 databases  
The review had added value by drawing on 27 barrier and 15 facilitator studies  
Both effectiveness and appropriateness are addressed  
However, just 10 intervention studies were detected

## INTRODUCTION

Although the importance of research evidence is largely unquestioned intellectually, medical practice often diverges from evidence-based recommendations. This denies patients the benefits of medical research.<sup>1</sup> Despite initiatives to improve the use of research findings, variation in the uptake of evidence exists.<sup>2</sup> The communication of clinically important research is hampered by the volume and geometric growth of the medical literature. Systematic reviews can address this problem and are a good way of taming the evidence.<sup>3</sup> A systematic review is a 'review of a clearly formulated question that uses systematic and explicit methods to identify, select and critically appraise relevant research, and to collect and analyse data from studies that are included in the review'.<sup>4</sup>

Evidence from systematic reviews however has not been widely adopted by healthcare professionals.<sup>5</sup> A review of physicians' information-seeking behaviour found that textbooks are the most frequently used source of information, followed by advice from colleagues.<sup>6</sup>

1  
2  
3  
4  
5  
6  
7  
8  
9  
10  
11  
12  
13  
14  
15  
16  
17  
18  
19  
20  
21  
22  
23  
24  
25  
26  
27  
28  
29  
30  
31  
32  
33  
34  
35  
36  
37  
38  
39  
40  
41  
42  
43  
44  
45  
46  
47  
48  
49  
50  
51  
52  
53  
54  
55  
56  
57  
58  
59  
60

Systematic reviews were never cited as the source of research evidence when such evidence was used by policy makers and healthcare managers.<sup>7</sup> Research into interventions for enhancing the uptake of evidence by clinical practitioners and by policy makers indicate that further examination of the issue is warranted.<sup>8,9</sup>

The creation of systematic reviews without attention to their uptake is clearly a sterile exercise. Systematic reviews were the focus of this investigation, rather than the more commonly investigated clinical practice guidelines or individual, primary studies. Systematic reviews are based on primary research while clinical practice guidelines are an amalgam of clinical experience, expert opinion, patient preferences, and evidence. Systematic reviews are a scientific exercise aimed at generating new knowledge and they provide a summary of relevant primary research. In this way, they can help keep us current. Systematic reviews have a distinct development and scientific purpose that differs from both guidelines and primary research. Given the considerable differences between integrative reviews and clinical practice guidelines, we set out to identify factors enhancing the uptake specifically of systematic reviews and meta-analyses.

The current authors had previously identified the barriers<sup>10</sup> and also the facilitators<sup>11</sup> impacting on systematic review uptake. Outcome studies of interventions that attempt to enhance systematic review uptake were now addressed. **Uptake encompassed an increase in awareness, familiarity and intellectual adoption as well as practical use in decision making, giving this review a broader focus than previous work in the area.<sup>2,8,9</sup> Nor were the decision makers included in this review limited to any specific background as occurs in other reviews.<sup>2,8,9</sup>**

Importantly, a further synthesis was also carried out integrating the previously identified barriers and facilitators with the newly selected interventions detected in our systematic review. This study was needed in order to identify strategies that can be used to improve systematic review uptake. By drawing on our previous barrier and facilitator research, the appropriateness of these newly identified interventions can now also be estimated. This review has added value. Having assessed not just the effectiveness but also the relevance of the detected interventions, recommendations can now be made about the use of specific strategies to improve systematic review uptake.

There are challenges however to synthesizing such diverse evidence sources.<sup>12</sup> A hybrid approach was used here to address different but related elements of an overall review question.<sup>13</sup> Separate syntheses of intervention but also non-intervention studies, with an overall narrative commentary, are described.

The studies to be included in our review were diverse. For barriers and natural facilitators, the reports included surveys, focus groups, and interviews.<sup>10,11</sup> But intervention studies were also included in the final overarching synthesis. So results from qualitative studies were juxtaposed with results of randomized-controlled trials. Data was extracted from these disparate studies and a synthesis carried out.<sup>14</sup>

Attention to other vantage points that decision makers adopt when confronted with an innovation is important.<sup>15</sup> The aim here was to illuminate a complex area from different angles.<sup>16</sup> The objective was also to identify gaps in existing research evidence.<sup>17</sup> Narrative

1  
2  
3 synthesis provided a summary of the current state of knowledge where recommendations  
4 could then be made for enhancing uptake of evidence from systematic reviews.<sup>13</sup>  
5

## 6 **Method**

### 7 *Search strategy*

8  
9 We conducted a systematic review of the literature to identify interventions to enhance  
10 evidence uptake from systematic reviews, meta-analyses, and the databases containing them.  
11 The primary researcher (JW) searched 19 databases and used 3 search engines, for articles,  
12 not limited to the English language, and covering the full range of publication years available  
13 in each database up to Dec 2010 using a combination of index terms and text words derived  
14 from relevant articles previously identified.  
15  
16

17  
18 The databases searched included the Cochrane Library, TRIP, Joanna Briggs Institute,  
19 National Guideline Clearing House, Health Evidence, PubMed (1950-Dec 2010), EMBASE  
20 (1980-Dec 2010), ERIC, CINAHL, PsycInfo, OpenSigle, Index to Theses in Great Britain  
21 and Ireland, and Conference Papers Index, Campbell Collaboration, Canadian Health  
22 Services Research Foundation, EPOC, KT+, McMaster University, Keenan Research Centre,  
23 and the New York Academy of Medicine. The search engines ALTA VISTA and Google  
24 Scholar were also utilised with a special emphasis on grey and knowledge translation  
25 literature. References from included primary studies and related review articles were scanned,  
26 experts in the field contacted, and bibliographies of textbooks were reviewed. **A combination  
27 of index terms and text words was used generated by the structured research question.** A wide  
28 range of synonyms for uptake were combined with various terms for synthesis and systematic  
29 reviews, **together with synonyms for improvement. Search terms, including systematic  
30 review and meta-analysis, were combined with terms for interventions or uptake, together  
31 with the synonyms for improve or enhance. A wide range of search terms was employed  
32 including facilitator, incentive, improve, enhance, disseminate, utilise, translate, uptake,  
33 intervention, overview, systematic review and meta-analysis. The search terms, using  
34 truncation, were linked into the search strategy using Boolean operators. The strategy was  
35 broadened or narrowed depending on need or result when applied to the different databases  
36 listed.** Uptake encompassed connectivity, awareness, familiarity, adoption, use, and  
37 healthcare outcomes.  
38  
39

40  
41 We repeated parts of the search for the period January 2011 to January 2014 in order to  
42 identify any potentially relevant or on-going studies. We applied the same search strategies to  
43 PubMed and EMBASE, the two most productive databases in terms of studies identified for  
44 inclusion in the review. We also searched all active registers in the *metaRegister* of controlled  
45 trials (<http://www.controlledtrials.com/mrct/>), in January 2014, for reports of relevant on-  
46 going or completed trials, to be listed under 'On-going studies' and 'Studies awaiting  
47 classification' that could be included in an update of this review.  
48

### 49 *Selection criteria*

50  
51 Two review authors independently assessed studies for inclusion; discrepancies were  
52 resolved by discussion or by a third party. Studies with no clear relation to systematic review  
53 uptake were excluded. We included studies if they were an original collection of data.  
54  
55  
56  
57  
58  
59  
60

### *Inclusion criteria*

To be included in the review, primary studies had to meet the following criteria:

- Addressed interventions aimed at increasing the uptake of evidence specifically from systematic reviews, meta-analyses and the databases that contained them
- Databases could include The Cochrane Library, The Cochrane Database of Systematic Reviews, Database of Abstracts of Reviews of Effects, Cochrane Pregnancy and Childbirth Database, Oxford Database of Perinatal Trials, and the Reproductive Health Library
- All decision makers, including doctors, nurses, policy makers, the public and patients, were eligible
- Reports in any language were included
- Studies could be randomised trials, cluster randomised trials, controlled clinical trials and before-and-after studies
- Interventions could arise from within the research community or from within an organisation using systematic review evidence
- Strategies could be single-stranded or multi-faceted, or combine two or more interventions
- The mode of delivery of the intervention could be print, electronic, audio/visual or face-to face
- When a comparison was employed, the comparator could be no intervention or an alternative intervention
- It was not required that the interventions be specifically tailored to overcome specified, pre-identified barriers
- Measures of impact on knowledge, attitude, behaviour, or patient care were included

'Uptake' can refer to an increase in awareness, familiarity, adoption, as well as actual use of evidence. While measures of impact on knowledge, attitude or use of reviews were included, impact on patient care was also encompassed. Any outcome measure of the utilisation of systematic review evidence informing health care decision making was considered. Self-reported use of evidence was included as well as outcome measures of practical use. Interventions could arise from within the research community or from within an organisation using systematic review evidence. Strategies to enhance uptake of policy briefs, position statements or clinical practice guidelines were excluded.

Care was also taken to identify studies that produced multiple publications. When more than one report described a single study and each presented the same data, only the most recent publication was included. However, if more than one publication described a single study but each presented new and complementary data, both were included.

### *Data collection and analysis*

Two reviewers (JW and CB) independently abstracted specific information from full-text studies according to standardized data extraction checklist items derived from Cochrane Effective Practice and Organisation of Care criteria checklists.<sup>18</sup> Discordances between the two reviewers were resolved by consensus. Two reviewers assessed the risk of bias of included studies using criteria described by EPOC. For all of the studies included in the

1  
2  
3 review, we assigned an overall risk of bias rating such as high, moderate and low based on  
4 the standard criteria used in EPOC reviews.  
5

6 Strategies with a non-significant, a negative effect or did not meet the study objectives,  
7 compared with the primary objective of the authors, were classified as “ineffective”; “mixed  
8 effects” was ascribed to studies that partially reached their objectives; and strategies with a  
9 significant, positive effect were classified as “effective”.<sup>19</sup> No meta-analysis was performed  
10 because of the high heterogeneity between the outcomes of each study.<sup>20</sup> Reviews of  
11 research-to-action strategies add up the number of positive and negative comparisons and  
12 conclude whether interventions were effective on that basis.<sup>21</sup>  
13

#### 14 *Assessment of risk of bias*

15 Two reviewers assessed the risk of bias of included studies using criteria described by EPOC.  
16 Given the potential heterogeneity of the targeted behaviours, skills, and organisational factors  
17 relevant to the review, this reviewer did not base study inclusion on a minimum cut-off for  
18 methodological quality. For all of the studies included in the review, this reviewer assigned  
19 an overall risk of bias rating such as high, moderate and low, based on the standard criteria  
20 used in EPOC reviews. We assigned a rating of low risk of bias if the first three criteria were  
21 scored as done and there were no concerns related to the last three criteria; moderate if one or  
22 two criteria were scored as not clear or not done; and high if more than two criteria were  
23 scored as not clear or not done.<sup>22</sup> Each criterion was noted “Done,” “Not clear,” or “Not  
24 done”. Only studies with a low to moderate risk of bias were used to draw conclusions about  
25 effectiveness of interventions to enhance uptake of reviews.  
26  
27  
28

#### 29 **Data synthesis**

30 There is a tendency for more recent systematic reviews to include a wider range of diverse  
31 study designs.<sup>23</sup> A broader focus is now advocated.<sup>15</sup> Research findings on barriers and  
32 facilitators impacting on review uptake can help in the development of potentially effective  
33 intervention strategies. The interventions can modify or remove barriers and use and build  
34 upon existing facilitators to enhance evidence uptake. Following formal identification of  
35 strategies to improve uptake of systematic reviews, these interventions were then juxtaposed  
36 with previously highlighted barriers and facilitators.  
37  
38

39 A framework for including different types of evidence in systematic reviews was used here.<sup>13</sup>  
40 This approach has been successfully applied elsewhere.<sup>24-27</sup> Using a mixed-methods  
41 approach, three types of analyses were performed. These included a synthesis of non-  
42 intervention studies, a synthesis of intervention outcome evaluations, and lastly a synthesis of  
43 the intervention and non-interventions studies together. For the last of these, a matrix was  
44 constructed which laid out the barriers and facilitators alongside descriptions of the  
45 interventions included in the in-depth systematic review of outcome evaluations. It was thus  
46 possible to see where barriers have been modified, or facilitators built upon, by relatively  
47 sound interventions. It was also possible to identify promising interventions that need further  
48 assessment.<sup>13</sup> Furthermore, it was practical to ascertain where factors had not been addressed  
49 by any approach, necessitating the development of new interventions.  
50  
51  
52

53 The initial purpose of this review was to identify interventions that improve uptake of  
54 systematic reviews. The next objective was to ascertain whether the detected interventions  
55 addressed issues important to decision makers. This allowed a utilization of views on barriers  
56 and facilitators as a marker of the appropriateness of different interventions.<sup>13</sup>  
57  
58  
59  
60

## RESULTS

The results of the extensive search for studies addressing interventions that enhance uptake of systematic reviews are given in Figure 1.

**Figure 1. PRISMA Flow diagram**

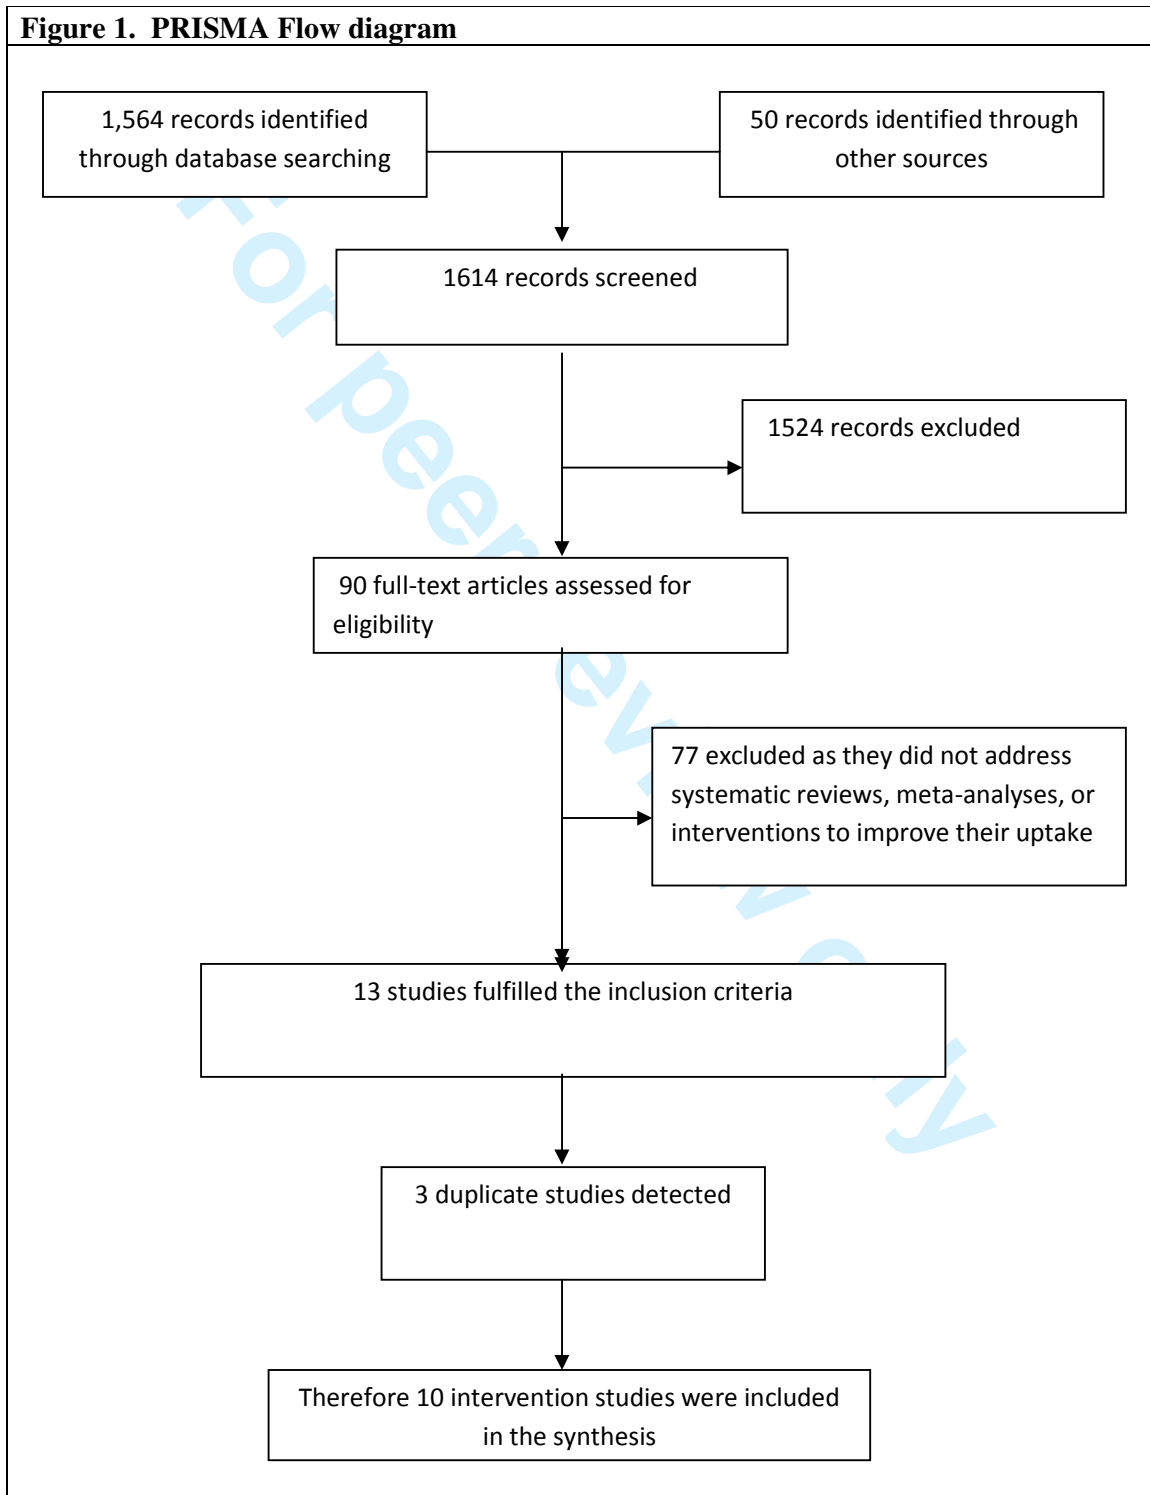

### Results of the search

Some 1,564 records were identified through database searching covering the full range of publication years available in each of the 19 database up to December 2010 and 50 records identified through other sources, such as bibliographies of related reviews and primary studies, textbooks and contact with authors. Of the total number of 1,614 titles and abstracts screened from all sources, including qualitative and grey literature searching, 1,524 records were excluded as not meeting inclusion criteria. Then 90 full-text articles were retrieved and assessed for eligibility. Some 62 studies were excluded as they did not address systematic reviews or meta-analysis, 3 were duplicate studies, and 15 studies were excluded and analysed separately as they addressed natural, non-intervention facilitators derived from surveys, focus groups and interviews.<sup>11</sup> A selective list of studies excluded after reading the full text is given as a supplementary file. Ten intervention studies were included and form the substrate for this review (Table 1).

A further search of EMBASE and PubMed from Jan 2011 to January 2014 yielded 248 and 387 records respectively but failed to identify any further relevant studies. The metaRegister of controlled trials was also searched in January 2014 and no study was identified for inclusion in 'Studies awaiting classification' or 'On-going studies'. An example the search strategies utilised is given in Table 2.

### Included studies

Of the ten included intervention studies, this researcher counted 5 randomised controlled trials, 3 cluster randomised controlled trials, 1 controlled clinical trial, and 1 before-after study.<sup>28-37</sup> There were 8 two-arm trials, 1 single-arm trial and 1 three-armed trial. The unit of allocation was the health professional, such as a doctor, in 3 studies, the patient in 1 report, and a larger grouping such as the hospital or geographical location in 6 studies.

#### *Settings and characteristics of professionals*

The nature of the desired change, professionals targeted, and the settings, differed from one intervention study to the next. Four studies were undertaken in the UK, 1 each in Australia, USA and Canada while 1 study was conducted across five countries: Germany, Hungary, Spain, Switzerland and the UK. The remaining 2 studies were carried out in the Netherlands and the UK, and in Mexico and Thailand, respectively. The studies were conducted in 11 countries in total.

Eight of the intervention studies took place in a hospital setting while the remaining two investigations were conducted in a government department and a medical school. In 6 of the studies, the professionals included doctors of different sub-specialities and at varying stages of training. Two studies dealt with obstetricians, 1 study included psychiatrists, another GPs, and 2 studies involved Interns (Foundation year). Three reports included nurses or midwives, one targeted patients as participants exclusively, while another looked at programme managers.

#### *Prospective identification of barriers to change*

None of the 10 studies tailored the intervention to prospectively identified barriers to uptake of evidence from systematic reviews or meta-analyses.



### *Theoretical underpinning*

Eight studies identified a theoretical underpinning to their choice of intervention. One study included a costing for their intervention to improve uptake of evidence from systematic reviews.<sup>28</sup>

### *Characteristics of interventions*

Among these reports, interventions included clinically integrated e-learning courses (3/10), educational visits (2/10), a computer-based (CD-ROM) session focusing on critical appraisal of systematic reviews (2/10), brief summaries of systematic reviews (1/10), a manual of Cochrane reviews (1/10), and access to an online registry, tailored messaging and use of knowledge brokers (1/10). Descriptions of the strategies are outlined in Table 1. One study investigated three interventions.<sup>33</sup>

### *Risk of bias in included studies*

Of the 10 included studies, 8 had addressed allocation concealment. Follow-up of professionals was carried out adequately in 6 studies. Blinded assessment of the primary outcome was carried out in 9 studies. Baseline measurement was conducted adequately in 5 studies. A reliable primary outcome measure was reported in all 10 studies. Protection against contamination was assessed by us as adequate in 7 studies. Regarding the overall risk of bias, 2 studies were assessed as being at high risk,<sup>34,35</sup> two at low risk of bias,<sup>28,32</sup> while 6 studies were regarded as being of moderate risk of bias.<sup>29,30,31,33,36,37</sup>

### *Outcomes*

Use of correct outcome measures in this area is of considerable importance.<sup>38</sup> Six studies were concerned with changing knowledge and attitudes. One report analysed both knowledge and decision-maker behaviour<sup>30</sup> while another<sup>31</sup> addressed practice and quality of life. Two studies analysed specific practice change (Table 3).<sup>28,33</sup>

Three studies, of low-to-moderate risk of bias, showed a statistically significant improvement on some relevant outcome. These interventions included educational visits<sup>28</sup>, short summaries of systematic reviews<sup>29</sup>, and targeted messaging.<sup>33</sup>

Other interventions such as interactive workshops produced 'substantial' benefits.<sup>30</sup> Clinically integrated e-learning courses and a computer-based series of teaching sessions brought about some knowledge and attitude gain from baseline (Table 3).

## **Synthesis of barrier, facilitator and intervention studies**

Having identified ten reports meeting our criteria as intervention outcome studies, we then went on to juxtapose these interventions with the barrier and facilitator studies identified in two systematic reviews previously conducted by the authors.<sup>10,11</sup>

Figure 2 outlines the number of studies included at various stages of this second, overarching review. Systematic and exhaustive searches identified 3,329 citations in total. Retrieval, screening, and classification of full reports had previously resulted in the identification of 27 studies addressing barriers and 15 studies that included facilitators.<sup>10,11</sup> These were now joined by the 10 studies evaluating interventions to enhance systematic review uptake.<sup>28-37</sup> Use of multiple data sources can enhance the credibility of findings.<sup>39</sup> Intervention study characteristics were included in Table 1 while barrier and facilitator study characteristics

were described previously.<sup>10,11</sup>The synthesis of these barrier, facilitator, and intervention studies, **with the 3 most effective interventions listed first**, is outlined in **Table 4**.

**Figure 2. An overview of all stages of the review and the approach taken**

|                                                                                                                                                                                                                                                                                                                                                                                                                                                                      |                                                                                                                                                                                                                                                                                                                                                                                          |
|----------------------------------------------------------------------------------------------------------------------------------------------------------------------------------------------------------------------------------------------------------------------------------------------------------------------------------------------------------------------------------------------------------------------------------------------------------------------|------------------------------------------------------------------------------------------------------------------------------------------------------------------------------------------------------------------------------------------------------------------------------------------------------------------------------------------------------------------------------------------|
| <b>Review question</b>                                                                                                                                                                                                                                                                                                                                                                                                                                               |                                                                                                                                                                                                                                                                                                                                                                                          |
| ‘What is known about the barriers, facilitators, and interventions impacting on uptake of systematic reviews?’                                                                                                                                                                                                                                                                                                                                                       |                                                                                                                                                                                                                                                                                                                                                                                          |
| <b>Stage 1: Mapping and quality screening exercise</b>                                                                                                                                                                                                                                                                                                                                                                                                               |                                                                                                                                                                                                                                                                                                                                                                                          |
| Systematic and exhaustive searches identified 3,329 citations. Studies were included if they addressed barriers and facilitators to uptake of evidence specifically from systematic reviews, meta-analyses and the databases that contained them. Retrieval, screening, and classification of full reports resulted in the identification of 27 studies addressing barriers, 15 studies that included natural facilitators, and 10 studies evaluating interventions. |                                                                                                                                                                                                                                                                                                                                                                                          |
| <b>Non-intervention studies</b><br>Studies of decision makers’ views                                                                                                                                                                                                                                                                                                                                                                                                 | <b>Intervention studies</b><br>Rigorous evaluation studies of interventions<br>Focus on addressing impact on knowledge, attitude, behaviour and practice                                                                                                                                                                                                                                 |
| <b>Stage 2: in-depth review</b>                                                                                                                                                                                                                                                                                                                                                                                                                                      |                                                                                                                                                                                                                                                                                                                                                                                          |
| Synthesis across study types to answer sub-question:                                                                                                                                                                                                                                                                                                                                                                                                                 |                                                                                                                                                                                                                                                                                                                                                                                          |
| ‘To what extent do interventions overcome the barriers identified by decision makers and build upon the facilitators to uptake of evidence from systematic reviews?’                                                                                                                                                                                                                                                                                                 |                                                                                                                                                                                                                                                                                                                                                                                          |
| <b>Non-intervention (views) studies</b><br>Application of inclusion criteria resulted in 27 studies addressing barriers and 15 identifying facilitators.<br>Data extracted for description of characteristics and quality<br>Findings extracted<br>Findings synthesised to answer sub-question: ‘What are the views on uptake of evidence from systematic reviews?’                                                                                                  | <b>Intervention studies (outcome evaluations)</b><br>Application of inclusion criteria resulted in 10 outcome studies<br>Data extracted for description of characteristics and quality<br>Findings extracted<br>Eight out of 10 studies were of low-to-moderate risk of bias<br>Findings synthesised to answer: ‘What are the effects of interventions on uptake of systematic reviews?’ |

### Decision maker's views

Research indicates that the perceived barriers to the use of evidence from systematic reviews tend to vary.<sup>10</sup> The most commonly investigated barriers were lack of use, lack of awareness, lack of access, lack of familiarity, lack of perceived usefulness, lack of motivation, and external barriers related to the format and content of reviews and a prevailing negative organisational culture.

Perceived facilitators to the use of evidence from systematic reviews are also diverse.<sup>11</sup> The five most commonly reported facilitators to uptake of evidence from systematic reviews were: the perception of systematic reviews as having multiple uses; a content that included benefits, harms and costs; a format with graded access and executive summary; training in use, and peer-group support.

### Synthesis

Table 4 shows the synthesis matrix which juxtaposes barriers and facilitators alongside the results of outcome evaluations. **The three interventions having a statistically significant impact on at least one outcome measure are listed first.** There were some matches but also significant gaps between what decision makers see as helpful to evidence uptake from systematic reviews and, on the other hand, soundly evaluated interventions that addressed both facilitators and barriers.

Three interventions, of low-to-moderate risk of bias, had statistically significant results on at least one outcome measure. These strategies included targeted messaging, educational visits, and summaries of systematic reviews.

Tailored, targeted messaging addressed the specific barriers of limited access to, awareness of, and familiarity with systematic reviews. Targeted messaging also built on enhancers of uptake such as increased choice of format, with web-based delivery and an overall improved access. A graded format takes into account the disparate information needs of various disciplines at different positions in an organisation. It addresses the concern that one size does not fit all.

Educational visits overcame and built on a wide range of factors. Knowledge barriers such as lack of access, lack of awareness and familiarity; attitudinal barriers such as limited motivation, perceived lack of usefulness and relevance; and external barriers such as an adverse organisational climate, were impacted on by this complex intervention. Increased access and training were among the facilitators of uptake of systematic reviews built on by this approach that also took into account the information needs of the target audience and their level of training.

Brief summaries of systematic reviews overcame the knowledge barriers of lack of access, lack of awareness and familiarity; attitudinal barriers of perceived lack of usefulness and relevance; and the external barrier of systematic reviews usually having a standard format for all readers, regardless of their level of training. Brief summaries facilitated the uptake of evidence from systematic reviews by providing a one-page, web-based, useful synopsis that took into account the information needs and time demands of the target audience.

1  
2  
3 A number of other promising interventions, not achieving statistically significant results, also  
4 overcame important barriers and built on a number of facilitators. A multifaceted educational  
5 intervention addressed a wide range of knowledge, attitude, and external barriers, and also  
6 built on facilitators to produce substantial but non-significant knowledge and attitudinal  
7 gains.<sup>30</sup> A patient manual addressed similar barriers and facilitators as did the brief  
8 summaries of systematic reviews.<sup>31</sup>  
9

10  
11 A further three studies using e-learning, addressed a similar number of barriers and  
12 facilitators.<sup>32,34,35</sup> Each of the two computer-based interventions addressed the same factors in  
13 terms of number and content and brought about some non-significant, improvement between  
14 pre- and post-assessment.<sup>36,37</sup>  
15

16  
17 A number of issues were identified that had not been addressed by the effective or promising  
18 interventions. These were mainly facilitators and included building on the time-saving aspect  
19 of systematic reviews, their perceived ease of use, their importance relative to other sources  
20 of information, and their ability to improve confidence. The added value of logos and the  
21 advantages of consistent presentation were not utilised as often as they might have been.  
22

## 23 Discussion

24 This study systematically identified interventions that enhance the uptake of evidence from  
25 systematic reviews. Previous reviews tend to focus on practical use of systematic reviews<sup>2</sup>,  
26 rather than a more general uptake incorporating an increase in knowledge or a change in  
27 attitude. Previous overviews place an emphasis on use by specific decision makers such as  
28 policy makers<sup>8</sup> or clinicians<sup>9</sup> rather than including all stakeholders as occurs in this systematic  
29 review. Our review reported three interventions that had a statistically significant impact on  
30 at least one outcome measure rather than simply highlighting a positive trend.<sup>8,9</sup> Furthermore,  
31 our review did not base recommendations on studies deemed to have a low quality of  
32 evidence.<sup>9</sup>  
33  
34

35 Indeed, this synthesis differed from others in that it incorporated a second overarching review  
36 in order to illustrate the extent to which the detected interventions addressed barriers and  
37 facilitators impacting on systematic review uptake. Importantly, this allowed our mixed-  
38 methods design, to generate recommendations about interventions to enhance review uptake.  
39  
40

41 The evidence for the effectiveness of interventions to improve systematic review uptake is  
42 variable. Three interventions, of low-to-moderate risk of bias, had a statistically significant  
43 advantage over a comparison on at least one outcome measure. These interventions included  
44 educational visits, short summaries of systematic reviews, and targeted messaging. Other  
45 interventions such as interactive workshops produced 'substantial' benefits, while clinically  
46 integrated e-learning courses and computer-based series of teaching sessions brought about  
47 some knowledge or attitude gain from baseline. No study demonstrated a significant impact  
48 directly on patient care.  
49

50  
51 Unlike other reviews, this study adopted a wider perspective through inclusion of studies of  
52 decision maker's views as well as outcome effectiveness studies. Taking account of a  
53 decision maker's preferences and abilities is important.<sup>39</sup> Juxtaposing perceived barriers and  
54 facilitators alongside effectiveness studies allowed us to examine the extent to which the  
55 needs of decision makers had been adequately addressed by the evaluated interventions. To  
56 some extent they had. Lack of access, awareness, and familiarity were frequently overcome  
57  
58  
59  
60

1  
2  
3 as barriers. However, fewer of the identified facilitators appear to have been built on by the  
4 interventions.

5  
6 We recommend 3 interventions: tailored, targeted messaging, systematic review summaries,  
7 and educational visits. These address a range of factors impacting on review uptake. Some  
8 approaches however require additional work before they can be recommended for practice.<sup>40</sup>  
9 Interventions such as e-learning, computer-based learning, multifaceted educational  
10 interventions, an on-line registry and the use of a knowledge broker are strategies that need to  
11 be developed further.  
12

13  
14 Many of the gaps in the evidence about uptake of systematic reviews tended to be in relation  
15 to building on identified facilitators. Despite a wide search, we found few evaluations of  
16 strategies that emphasized the time-saving aspect of systematic reviews, their importance  
17 relative to other sources of information and their ability to improve self-confidence in using  
18 evidence. New interventions need to be developed that build on these enhancers of uptake.  
19

20  
21 A surprising finding was that, despite the wider range of barriers and facilitators addressed by  
22 use of a knowledge broker, this intervention was not as effective as targeted, tailored  
23 messaging.<sup>33</sup>The more complex intervention was not more effective. That targeted, tailored  
24 messaging overcame and built on a smaller number of barriers and facilitators suggests that it  
25 is not the number of factors addressed that is central but their relevance and intensity.  
26

### 27 *Limitations*

28 A frequent disappointment in the conduct of systematic reviews is the relative paucity of  
29 published primary studies on which to base the review.<sup>41</sup>We found just 10 intervention  
30 studies in all, with 8 of these of moderate-to-low risk of bias. Identification of published  
31 studies on evidence uptake is difficult because they are poorly indexed and scattered across  
32 generalist and specialist journals. Some publications may have been missed, though an  
33 extensive search was conducted using over 19 databases. Furthermore, reporting was  
34 sometimes incomplete so that data extraction was problematic.<sup>42</sup>  
35  
36

37 Important methodological limitations and inconsistencies among the studies identified make  
38 it extremely difficult, currently, to justify policy action taken on the basis of evidence alone.<sup>20</sup>  
39 The limitations of our review largely reflect the limitations of the literature reviewed.  
40 Undertaking reviews in this area is difficult because of the complexity inherent in the  
41 interventions, the variability of the methods used, and the difficulty of generalising findings  
42 across healthcare settings.  
43

44  
45 The impact of the interventions was not consistent across users, settings, or behaviours.  
46 Positive studies had just one or two of many outcome measures that yielded a significant  
47 result. Some studies presented a positive trend, others statistically significant outcomes.  
48 Certain interventions appeared to improve knowledge and attitudes, and to a lesser extent,  
49 performance. None were shown to impact on patient outcomes. This issue of patient-centred  
50 outcomes is likely to become more prominent in the coming years.<sup>15</sup> Although the current  
51 evidence base is incomplete, this synthesis does however provide valuable insights into the  
52 likely effectiveness of different interventions.  
53

### 54 *Implications for research*

55 We need to standardize reporting of trials of interventions to improve professional  
56 performance. A broad framework should be developed for designing and selecting  
57  
58  
59  
60

1  
2  
3 appropriate interventions across a wide range of professional activities in which gaps between  
4 evidence and practice are found.<sup>43</sup> Both clinical practice and also more patient outcome data  
5 are required.  
6

7 Barriers and facilitators can be used as starting point for intervention relevance.<sup>13</sup> This review  
8 can be considered a resource. The conclusions suggest recommendations for a research  
9 agenda based on appropriate and feasible interventions that could be evaluated for their  
10 effectiveness.  
11

12 Barriers and facilitators that were not addressed adequately in any of the intervention  
13 evaluations led us to draw conclusions about opportunities for new interventions and their  
14 subsequent evaluation. We have noted that several barriers to, and facilitators of, uptake of  
15 systematic reviews have received little attention. Reviews are perceived as having a limited  
16 range, a narrow focus, are poorly promoted and not updated frequently enough.<sup>10</sup> The  
17 medico-legal relevance of systematic reviews has not been highlighted sufficiently. Further  
18 work is needed to develop and evaluate interventions which modify or remove identified  
19 barriers and build on highlighted facilitators.  
20  
21

### 22 *Implications for practice*

23 This framework allows reviewers to address some of the criticisms of systematic reviews of  
24 controlled trials by taking into account the social and structural influences on their uptake.<sup>13</sup>  
25 It is important to carefully select the intervention most likely to be effective in the light of the  
26 diagnosed problem.<sup>44</sup> Choosing the right strategy is an essential component of developing  
27 evidence-based practice and ultimately improving patient care.<sup>45</sup> We need to focus more on  
28 impacting on patient satisfaction and quality of life.<sup>46</sup> Clinically integrated interventions are  
29 also required.<sup>47</sup>  
30  
31

32 Presentation is as important as results. Little attention has been paid to the format of a  
33 review.<sup>5</sup> The reviews are often technical, contain complex statistics, and are written in an  
34 academic style. The evidence suggests that systematic reviews should be presented in an  
35 easily understood way with information accessed in a graded manner. The identification of a  
36 take-home message is important.  
37  
38

39 The aim here was to place the different interventions in perspective.<sup>48</sup> It is important to  
40 consider the target audience, their values and preferences while linking the key message to  
41 the level of the decision maker's training. We should refocus efforts on improving and  
42 promoting graded access to summaries of evidence.  
43  
44

### 45 **CONCLUSION**

46 We recommend 3 interventions: tailored, targeted messaging, systematic review summaries,  
47 and educational visits. These address a range of identified factors impacting on review  
48 uptake. Other interventions, such as e-learning approaches, need to be developed further.  
49 New interventions need to be devised that build on neglected facilitators of uptake.  
50  
51

52 This review has added value compared with conventional reviews of effectiveness.<sup>13</sup> The  
53 advantage lies in the ability to examine systematically a much wider literature so to suggest  
54 recommendations for practice. A conventional review of effectiveness in this area would  
55 have been able to draw on 10 outcome evaluation reports to generate conclusions about  
56  
57  
58  
59  
60

effectiveness. We were able to draw on an additional 27 studies encompassing decision maker's views about barriers and 15 studies targeting facilitators.

We addressed not just effectiveness but also appropriateness. The approach utilized a larger proportion of research evidence relevant to the review question. The evidence synthesized here is important to a broad sweep of institutions concerned with evidence uptake in general and systematic review uptake in particular.

### **Conflict of interest: None**

There was no known conflict of interest related to or unrelated to the research.

All authors have completed the Unified Competing Interest form and declare: no support from any organisation for the submitted work, no financial relationships with any organisations that might have an interest in the submitted work in the previous three years, no other relationships or activities that could appear to have influenced the submitted work.

Additional information, including the protocol, examples of the search strategy, and risk of bias tables for each individual study and bias across groups, is available from the corresponding author at [john.wallace@wadh.oxon.org](mailto:john.wallace@wadh.oxon.org)

The authors are happy to share data.

All authors were involved in the conceptualization, conduct, preparation, and writing up of the research. All authors made a substantial contribution to the design, acquisition, analysis and interpretation of data. All were involved in the drafting and revision of the article for intellectual content and all approved the final version.

No ethical approval was required.

No funding was received or sought.

## **REFERENCES**

1. INNVAER, S., VIST, G., TROMMALD, M., OXMAN, A. Health policy-makers' perceptions of their use of evidence: a systematic review. *Journal of Health Services Research & Policy*, 2002; 7 (4):239–244.
2. MURTHY, L., SHEPPERD, S., CLARKE, M. J., GARNER, S. E., LAVIS, J. N., PERRIER, L., ROBERTS, N. W. & STRAUS, S. E. Interventions to improve the use of systematic reviews in decision-making by health system managers, policy makers and clinicians. *Cochrane Database Syst Rev*, 2012. 9,CD009401.

- 1  
2  
3 3. KNOTTNERUS, J. A. and TUGWELL, P. 'The evidence base of taming continuously  
4 proliferating evidence', *Journal of Clinical Epidemiology*, 2012. 65(12), 1241-1242.  
5
- 6 4. SACKETT, D, ROSENBERG, WC., MUIR GRAY, JA. HAYNES, R. B., and  
7 RICHARDSON, W.S. Evidence based medicine: what it is and what it isn't. *BMJ*, 1996;  
8 312:71.  
9
- 10 5. TETZLAFF, J. TRICCO, A. and MOHER, D. Knowledge Synthesis. In Straus S, Tetroe  
11 J, Graham I D, editors. *Knowledge translation in health care*. UK: Wiley-Blackwell, BMJ  
12 Books; 2009.  
13
- 14 6. DAWES, M., SAMPSON, U. Knowledge management in clinical practice: a systematic  
15 review of information seeking behavior in physicians. *Int J Med Infor* 2003 Aug; 71(1):9-  
16 15.  
17
- 18 7. LAVIS, J., DAVIES, H., OXMAN, A., DENIS, J.L., GOLDEN-BIDDLE K, and  
19 FERLIE, E. Toward systematic reviews that inform health care management. *Journal of*  
20 *Health Services Research & Policy*. 2005; 10 Suppl 1: 35-48.  
21
- 22 8. PERRIER, L., MRKLAS, K., LAVIS, J. N. and STRAUS, S. E. Interventions  
23 encouraging the use of systematic reviews by health policymakers and managers: A  
24 systematic review. *Implement Sci*, 2011. 6, 43.  
25
- 26 9. PERRIER, L., MRKLAS, K., SHEPPERD, S., DOBBINS, M., MCKIBBON, K. A. and  
27 STRAUS, S. E. Interventions encouraging the use of systematic reviews in clinical  
28 decision-making: a systematic review. *J Gen Intern Med*, 2011. 26(4), 419-26.  
29
- 30 10. WALLACE, J., NWOOSA, B., CLARKE, .J. Barriers to the uptake of evidence from  
31 systematic reviews and meta-analyses: a systematic review of decision makers'  
32 perceptions. *BMJ Open*. 2012;2:e001220 doi: 10. 1136/bmjopen-2012-001220  
33
- 34 11. WALLACE, J, BYRNE, C., CLARKE, M. Making evidence more wanted; a systematic  
35 review of facilitators to enhance the uptake of evidence from systematic reviews and  
36 meta-analyses. *Internal J Evid Based Healthcare*. 2012. 10 (4): 338-46 doi:  
37 10.1111/j.1744-1609.2012.00288.x  
38
- 39 12. POPE, C., MAYS, N., POPAY J. Synthesizing Qualitative and Quantitative Research.  
40 UK: McGraw-Hill; 2007.  
41
- 42 13. OLIVER, S, HARDEN, A, REES, R., SHEPHARD, J., BRUNTON, G., GARCIA, J., et  
43 al. An emerging framework for including different types of evidence in systematic  
44 reviews for public policy. *Evaluation*. 2005;11(4): 428-446.  
45
- 46 14. NOYES, J., POPAY, J., PEARSON, A., HANNES, K. and BOOTH, A. Qualitative  
47 Research and Cochrane Reviews, in Higgins J P and Green S, editors. *Cochrane*  
48 *Handbook for Systematic Reviews of Interventions*. Chichester, UK: John Wiley & Sons;  
49 2008.  
50  
51  
52  
53  
54  
55  
56  
57  
58  
59  
60



15. GARTLEHER, G. AND FLAMM, M. Is The Cochrane Collaboration prepared for the era of patient-centred outcomes research? *Cochrane Database Syst Rev*, 2013. 3, ED000054
16. WONG, G. GREENHALGH T, WESTTHORP PG, BUCKINGHAM J. RAMESES Publication Standards: Meta-Narrative Review. *BMC Medicine*. 2013 11, 20. DOI. 10.1186/1741-7015-11-20.
17. SHEPHERD, J., HARDEN, A., REES, R., BRUNTON, G., GARCIA, J., OLIVER, S, OAKLEY, A. Young people and healthy eating: a systematic reviews on research on barriers and facilitators. *Health Education Research*. 2005 26 Oct; 21:239-257.
18. Cochrane Effective Practice and Organisation of Care Group: Data Collection Checklist. EPOC resources for review authors Revised 2002:<http://www.epoc.cochrane.org/en/handsearchers.html>
19. CHAILLET, N., DUBE, E., DUGAS, M., AUDIBERT, F., TOURIGNY, C., FRAZER, W. D. and DUMONT, A. Evidence-based strategies for implementing guidelines in obstetrics: a systematic review. *Obstet Gynecol*, 2006. 108(5), 1234-45.
20. JOLY, A., NGUENG FEZE, I. and SIMARD, J. Genetic discrimination and life insurance: a systematic review, *BMC Medicine*, 2013 11:25
21. GROL, R. and GRIMSHAW, J. From best evidence to best practice: effective implementation of change in patients' care. *Lancet*, 2003, 362(9391), 1225-30.
22. BAKER, R., CAMOSSO-STEFINOVIC, J., GILLIES, C., SHAW, EJ, CHEATER, J, FLOTTORP, S, ROBERTSON, N. Tailored interventions to overcome identified barriers to change: effects on professional practice and health care outcomes. *Cochrane Database of Systematic Reviews*. 2010, Issue 3. Art. No.: CD005470. DOI: 10.1002/14651858.CD005470.pub2
23. ANGLIN, R. E., SAMAAAN, Z., WALTER, S. D. and MCCDONALD, S. D. Vitamin D deficiency and depression in adults: systematic review and meta-analysis. *Br J Psychiatry*, 2013 202, 100-7.
24. THOMAS, J., HARDEN, A., OAKLEY, A, OLIVER, S., SUTCLIFFE, R., REES, R., BRUNTON, G., KAVANAGH, J. Integrating qualitative research with trials in systematic reviews. *BMJ*, 2004; 328:1010.
25. BRUNTON, G., HARDEN, A., REES, R, KAVANAGH, J, OLIVER, S, OAKLEY, A. Children and Physical Activity: A Systematic Review of Barriers and Facilitators. London: EPPI-Centre, Social Science Research Unit, Institute of Education, University of London: 2003.
26. REES, R., Harden J, Shepherd G, Brunton S, Oliver, Oakley A. Young people and physical activity: a systematic review of barriers and facilitators. London:EPPI-Centre, Social Science Research Centre: 2001.

- 1  
2  
3 27. HARDEN, A., REES, J., SHEPHERD, G., BRUNTON, S., OLIVER, S., Oakley A.  
4 Young people and mental health: a systematic reviews of barriers and facilitators.  
5 London:EPPI-Centre, Social Science Research Centre: 2001.  
6  
7 28. WYATT, J., PATERSON-BROWN, S., JOHANSON, R., ALTAMN, D, BRADBURN,  
8 M., FISK, N. Randomized trial of educational visits to enhance use of systematic reviews  
9 in 25 obstetric units. *BMJ*. 1998; 317:1041-6.  
10  
11 29. OERMANN, M., ROOP, J., NORDSTROM, C., GALVIN, E., FLOYD, J. Effectiveness  
12 of an intervention for disseminating Cochrane reviews to nurses. *MEDSURG Nursing*,  
13 2007 Dec; 16:6.  
14  
15 30. GULMEZOGLU, AM, LNAGER, A., PIAGGO, G., LUMBIGANON P, VILLAR, J.,  
16 GRIMSHAW, J. Cluster randomised trial of an active multi-faceted educational  
17 intervention based on the WHO Reproductive Health Library to improve obstetric  
18 practices. *BJOG*, 2007; 114:16-23.  
19  
20 31. HARRIS, M., SMITH, B J, VEALE, A., ESTERMANN, A F, SELIM, P. Treatments: a  
21 controlled trial of outcomes. Providing patients with reviews of evidence about COPD.  
22 *Chronic Respiratory Disease*. 2006; 3:133.  
23  
24 32. KULIER, R., COPPUS. S., ZAMORA, J., HADLEY, J., MALICK, S., DAS, K.,  
25 WEINBRENNER, S., MEYERROSE, B., et al. The effectiveness of a clinically  
26 integrated e-learning course in evidence-ased medicine: A cluster randomised controlled  
27 trial. *BMC Medical Education*. 2009; 9:21.  
28  
29 33. DOBBINS, M., HANNA, S., CILISKA, D., MANSKE, S., CAMERON, R., MERCER,  
30 S. O'MARA, L., DECORBY, K., ROBESON, P. A randomized controlled trial evaluating  
31 the impact of knowledge translation and exchange strategies. *Implementation Science*.  
32 2009; 4:61.  
33  
34 34. KULIER, R., HADLEY, J., WEINBRENNER, S., MEYERROSE, B., DECSI, T.,  
35 HORVATH, A., et al. Harmonising Evidence-based medicine teaching: a study of the  
36 outcomes of e-learning in five European countries. *BMC Medical Education*. 2008; 8:27.  
37  
38 35. HADLEY, J., KULIER, R., ZAMORA, J., COPPIUS, S., WEINBRENNER, S.,  
39 MEYERROSE, B. Effectiveness of an e-learning course in evidence-based medicine for  
40 foundation (internship) training. *J R Soc Med*. 2010 July 1; 103(7):288–294.  
41  
42 36. DAVIS, J., CRABB, S., ROGER, E., ZAMORA, J., KHAN, K. Computer-based teaching  
43 is as good as face to face lecture-based teaching of evidence based medicine: a  
44 randomized controlled trial. *Medical Teacher*. 2008;30:302-307.  
45  
46 37. DAVIS, J, CHYSSAFIDOU, E., ZAMORA J, DAVIES, D, KHAN, K.  
47 COOMARASAMY, A. Computer-based teaching is as good as face to face lecture-based  
48 teaching of evidence based medicine: a randomised controlled trial. *BMC Med Educ*.  
49 2007; 7:23.  
50  
51  
52  
53  
54  
55  
56  
57  
58  
59  
60

- 1  
2  
3 38. BURTON, L. J., TYSON, S. and MCGOVERN, A. Staff perceptions of using outcome  
4 measures in stroke rehabilitation. *Disabil Rehabil.* 2013, 35, 828-34.  
5  
6  
7 39. LAWRENCE V, FOSSEY J, BALLARD C, MONIZ-COOK E, MURRAY J. Improving  
8 quality of life for people with dementia: making psycho-social interventions work. *BJP.*  
9 2012. 201:344-351.  
10  
11 40. VAN OORT, L., VAN DEN BERG, T., KOES, B. W., DE VET, R. H., ANEMA, H. J.,  
12 HEYMANS, M. W. & VERHAGEN, A. P. Preliminary state of development of  
13 prediction models for primary care physical therapy: a systematic review. *J Clin*  
14 *Epidemiol*, 2012. 65, 1257-66.  
15  
16  
17 41. MATSON, J. Narrative overview of systematic reviews and meta-analyses: evidence on  
18 many treatments for psychopathology in people with developmental disabilities is  
19 limited. *Evid Based Ment Health*, 2013.16, 44.  
20  
21  
22 42. STEWART, C. G., OMAR, O., MILENSU, S. & LY-MEE, Y. A systematic review finds  
23 that prediction models for chronic kidney were poorly reported and often developed using  
24 inappropriate methods. *Journal of clinical epidemiology*, 2013. In press.  
25  
26  
27 43. OXMAN, D., THOMSON, MA, DAVIS, D, HAYNES B. No magic bullets: a systematic  
28 review of 102 trials of interventions to improve professional practice. *Can Med Assoc.*  
29 1995 Nov 15; 153(10):1423-1431.  
30  
31  
32 44. EASTMAN, G., O'CONNELL, B., and GARDNER, A. Selecting the right integration of  
33 research into practice strategy. *J Nurs Care Qual.* 2008; 23(2):258-264.  
34  
35  
36 45. NABULSI, M., HARRIS, J., LETELIER, L., RAMOS K, HOPAYIAN, K., PARKIN, C,  
37 PORZSOLT, F., SESTINI, P., Et al. Effectiveness of education in evidence-based  
38 healthcare: the current state of outcome assessments and a framework for future  
39 developments. *International Journal of Evidence-based Healthcare.* 2007 Dec, 5(4):468-  
40 476.  
41  
42  
43 46. COOMARY, A., KHAN, K. What is the evidence that postgraduate teaching in evidence  
44 based medicine changes anything? A systematic review. *BMJ* 2004 Oct. 329:1017.  
45  
46  
47 47. MCCOLL, A., SMITH, H., WHITE, P. and FIELD, J. General practitioner's perceptions  
48 of the route to evidence based medicine: a questionnaire survey. *BMJ* 1998 316(7128),  
49 361-5.  
50  
51  
52 48. LEUCHT, S., HIERL, S., KISSLING, W., DOLD, M. and DAVIS, J. M. Putting the  
53 efficacy of psychiatric and general medicine medication into perspective: review of meta-  
54 analyses, *Br J Psychiatry*, 2012. 200(2), 97-106.  
55  
56

57 **Table I. Characteristics of included studies (n=10)**  
58  
59  
60

| Study Location Design                                                                                   | Strategy Participants Setting                                                                                                                        | Description                                                                                                                                                                                                     |
|---------------------------------------------------------------------------------------------------------|------------------------------------------------------------------------------------------------------------------------------------------------------|-----------------------------------------------------------------------------------------------------------------------------------------------------------------------------------------------------------------|
| Wyatt et al. 1996 <sup>28</sup><br>UK<br>RCT                                                            | Educational visit to obstetricians and midwives in 25 district obstetric units                                                                       | Educational visit (single) by a respected obstetrician advancing general ways to apply evidence from Cochrane reviews with The Cochrane database donated. Visit to lead obstetrician and midwife on labour ward |
| Gulmezoglu et al. 2006 <sup>30</sup><br>Mexico, Thailand<br>Cluster randomized trial                    | Multi-faceted intervention: interactive workshops in 40 maternity units in non-academic hospitals including doctors, midwives, interns, and students | 3 interactive workshops using RHL over 6 months, focusing on access and use with the focus on the RHL contents in general.                                                                                      |
| Harris et al. 2006 <sup>31</sup><br>Australia<br>Controlled clinical trial.                             | Patient manual to doctor's patients in 3 hospitals                                                                                                   | Patient manual of summaries of Cochrane reviews: 80 page, A5 size manual with 22 summaries of evidence organised into easy to find sections                                                                     |
| Oermann et al. 2007 <sup>29</sup><br>USA<br>RCT                                                         | Short summary of systematic review to fifty nurses in medical and surgical units in seven hospitals                                                  | Four short, one-page systematic review summaries delivered by e-mail or mail, on patient-controlled analgesia                                                                                                   |
| Davis et al. 2007 <sup>37</sup><br>UK<br>RTC                                                            | Computer-based session newly qualified medical doctors in 6 post-graduate centres                                                                    | CD ROM sessions, 40 minutes duration, emphasizing critical and application of systematic reviews and meta-analyses.                                                                                             |
| Kulier et al. 2008 <sup>34</sup><br>Before-and after-design<br>Germany, Hungary, Spain, Switzerland, UK | E-learning course to post-graduate medical trainees from different specialities in primary and secondary care                                        | 3 e-learning modules focusing on systematic reviews, with unlimited access over 6 weeks                                                                                                                         |

|                                                                                                                                                                                                                |                                                                      |                                                                                                                                                                  |                                                                                                                                                                                       |
|----------------------------------------------------------------------------------------------------------------------------------------------------------------------------------------------------------------|----------------------------------------------------------------------|------------------------------------------------------------------------------------------------------------------------------------------------------------------|---------------------------------------------------------------------------------------------------------------------------------------------------------------------------------------|
| 1<br>2<br>3<br>4<br>5<br>6<br>7<br>8<br>9                                                                                                                                                                      | Davis et al. 2008 <sup>36</sup><br>UK<br>RCT                         | Computer-based session for medical undergraduates in a medical school setting                                                                                    | 1 computer (CD-ROM) session focusing on systematic reviews and meta- analyses with a standardised structure of 40 minutes                                                             |
| 10<br>11<br>12<br>13<br>14<br>15                                                                                                                                                                               | Kulier et al. 2009 <sup>32</sup><br>Netherlands<br>UK<br>Cluster RCT | E-learning course for postgraduate trainees in 6 obstetrics and gynaecology departments                                                                          | 5 e-learning modules focusing on systematic reviews, over 5 weeks with on the job training, self-directed learning                                                                    |
| 16<br>17<br>18<br>19<br>20<br>21<br>22<br>23<br>24<br>25                                                                                                                                                       | Dobbins et al. 2009 <sup>33</sup><br>Canada<br>RCT                   | Tailored, targeted messaging, on-line registry, knowledge broker to 108 health departments: programme managers, programme coordinators, and programme directors. | Messages from 7 rigorous systematic reviews. A series of e-mails with link to full reference, abstract and summary. Also a visit from knowledge broker and access an on-line registry |
| 26<br>27<br>28<br>29<br>30<br>31<br>32<br>33<br>34<br>35<br>36<br>37<br>38<br>39<br>40<br>41<br>42<br>43<br>44<br>45<br>46<br>47<br>48<br>49<br>50<br>51<br>52<br>53<br>54<br>55<br>56<br>57<br>58<br>59<br>60 | Hadley et al. 2010 <sup>35</sup><br>UK<br>Cluster RCT                | E-learning course focusing on systematic reviews with post-graduate doctors at internship level in 7 teaching hospitals                                          | Clinically integrated e-learning EBM course 3 modules involving critical appraisal of systematic reviews, unlimited access over 6 weeks                                               |

**Table 2.** PubMed was searched from January 2011 to January 2014 using the advanced search facility

| Search | Query                                                                    | Items found |
|--------|--------------------------------------------------------------------------|-------------|
| 1      | systematic review AND facilitators AND knowledge uptake                  | 3           |
| 2      | meta-analysis AND facilitators AND knowledge uptake                      | 3           |
| 3      | systematic review AND enhance* AND knowledge uptake                      | 143         |
| 4      | meta-analysis AND enhance* AND knowledge uptake                          | 4           |
| 5      | systematic review AND facilitator* AND knowledge utilisation             | 0           |
| 6      | meta-analysis AND facilitator* and knowledge utilisation                 | 0           |
| 7      | systematic review AND improve* AND knowledge utilisation                 | 18          |
| 8      | meta-analysis AND improve* AND knowledge utilisation                     | 4           |
| 9      | overview* OR review* AND intervention AND knowledge translation          | 156         |
| 10     | systematic review* OR meta-analys* AND intervention* AND evidence uptake | 56          |

387 citations were returned by PubMed but no further relevant studies were identified

**Table 3. Risk of bias assessment and results of intervention studies**

| Study                                | Risk of Bias | Primary Measures                                                                                                                                                                                                                                                                                                                          | Outcome                                                                                                                                                                                                                            | Authors' Conclusions                                                                                                   |
|--------------------------------------|--------------|-------------------------------------------------------------------------------------------------------------------------------------------------------------------------------------------------------------------------------------------------------------------------------------------------------------------------------------------|------------------------------------------------------------------------------------------------------------------------------------------------------------------------------------------------------------------------------------|------------------------------------------------------------------------------------------------------------------------|
| Wyatt et al. 1997 <sup>28</sup>      | Low          | Ventouse usage. Steroid usage. Suture usage. Antibiotics usage and concordance of guidelines with systematic review                                                                                                                                                                                                                       | Overall baseline rate increased from 43% to 54%. Only one clinical practice improved significantly                                                                                                                                 | Educational visits added little to uptake of systematic review evidence. Significant change in ventouse delivery only. |
| Oermann et al. 2007 <sup>29</sup>    | Low          | Awareness, understanding, usefulness, and preferred mode of delivery of reviews.                                                                                                                                                                                                                                                          | Awareness improved significantly (p=0.001). Understanding improved non-significantly                                                                                                                                               | Short summaries of systematic reviews improve awareness of review evidence.                                            |
| Dobbins et al. 2009 <sup>33</sup>    | Low          | Use in a program decisions and change in healthy body weight promotion policies.                                                                                                                                                                                                                                                          | No significant effect for primary outcome (p=0.45). For policies, a significant effect for targeted, tailored messages (p<0.01). All groups improved.                                                                              | Targeted, tailored, messages are more effective than knowledge brokering and online registry.                          |
| Gulmezoglu et al. 2006 <sup>30</sup> | Mod          | Social support in labour<br>MgSO <sub>4</sub> for eclampsia.<br>Corticosteroids-preterm<br>Selective episiotomy.<br>Uterotonic use after birth.<br>Breastfeeding on demand.<br>External cephalic version.<br>Iron/folate supplementation.<br>Antibiotic use at CS. Vacuum extraction for assisted birth.<br>Knowledge of RHL. Use of RHL. | No consistent/substantive changes in 10 clinical practices. RHL awareness (24.8%-65.5% in Mexico, 33.9-83.3% in Thailand) and use (4.8-34.9% in Mexico and 15.5-76.4% in Thailand) increased substantially after the intervention. | Results were negative regarding practices targeted, but there was increased awareness, use of RHL.                     |
| Harris et al. 2006 <sup>31</sup>     | Mod          | Rates of flu vaccination, bone density testing, increased satisfaction, improved communication, reduced anxiety, improved quality of life.                                                                                                                                                                                                | No pattern of statistically benefit in primary or secondary outcome measures but virtually all trends favoured the intervention group. High levels of use, little impact on clinical practice.                                     | Advantages for the intervention were seen as trends.                                                                   |
| Davis et al.                         | Mod          | Knowledge gain, attitude gain                                                                                                                                                                                                                                                                                                             | Similar results for attitude and knowledge                                                                                                                                                                                         | Computer-based teaching as                                                                                             |

|    |                    |      |                         |                                |                       |
|----|--------------------|------|-------------------------|--------------------------------|-----------------------|
| 1  |                    |      |                         |                                |                       |
| 2  |                    |      |                         |                                |                       |
| 3  | 2007 <sup>37</sup> |      |                         |                                | effective as lecture- |
| 4  |                    |      |                         |                                | based.                |
| 5  |                    |      |                         |                                |                       |
| 6  |                    |      |                         |                                |                       |
| 7  |                    |      |                         |                                |                       |
| 8  |                    |      |                         |                                |                       |
| 9  | Kulier et          | High | Change in knowledge and | On average, knowledge          | E-learning about      |
| 10 | al.                |      | attitude scores.        | scores improved                | systematic reviews    |
| 11 | 2008 <sup>34</sup> |      |                         | significantly ( $p < 0.001$ ). | can be harmonised     |
| 12 |                    |      |                         | Attitudinal gains on two       | across different      |
| 13 |                    |      |                         | questions only ( $p = 0.00$ ,  | languages and         |
| 14 |                    |      |                         | $p = 0.007$ ).                 | specialities.         |
| 15 |                    |      |                         |                                |                       |
| 16 |                    |      |                         |                                |                       |
| 17 |                    |      |                         |                                |                       |
| 18 | Davis et           | Mod  | Knowledge gain          | Difference between             | Computer-based        |
| 19 | al.                |      | Attitude gain           | groups: -0.5 (95% CI -1.3,     | teaching and          |
| 20 | 2008 <sup>36</sup> |      |                         | 0.3; $p = 0.24$ ).             | typical lectures      |
| 21 |                    |      |                         |                                | have similar gains    |
| 22 |                    |      |                         |                                | in knowledge and      |
| 23 |                    |      |                         |                                | attitude.             |
| 24 |                    |      |                         |                                |                       |
| 25 |                    |      |                         |                                |                       |
| 26 | Kulier et          | Mod  | Change in knowledge and | The intervention group         | Both groups had an    |
| 27 | al.                |      | attitude scores         | outperformed by control        | improvement in        |
| 28 | 2009 <sup>32</sup> |      |                         | group by 3.5 points (95%       | attitude and          |
| 29 |                    |      |                         | CI: -2.7, 9.8) for knowledge   | knowledge but the     |
| 30 |                    |      |                         | gain: not statistically        | intervention group    |
| 31 |                    |      |                         | significant.                   | had a tendency to     |
| 32 |                    |      |                         |                                | better                |
| 33 |                    |      |                         |                                | performance.          |
| 34 |                    |      |                         |                                |                       |
| 35 |                    |      |                         |                                |                       |
| 36 |                    |      |                         |                                |                       |
| 37 |                    |      |                         |                                |                       |
| 38 |                    |      |                         |                                |                       |
| 39 | Hadley et          | High | Knowledge gain          | Adjusted post-course           | E-learning and        |
| 40 | al.                |      |                         | difference: only 0.1 scoring   | standard              |
| 41 | 2010 <sup>35</sup> |      |                         | points (95% CI 1.2, 1.4)       | classroom-based       |
| 42 |                    |      |                         | between groups: no             | teaching both         |
| 43 |                    |      |                         | difference in improvement      | improve               |
| 44 |                    |      |                         | in knowledge between           | knowledge.            |
| 45 |                    |      |                         | groups.                        |                       |
| 46 |                    |      |                         |                                |                       |
| 47 |                    |      |                         |                                |                       |
| 48 |                    |      |                         |                                |                       |
| 49 |                    |      |                         |                                |                       |
| 50 |                    |      |                         |                                |                       |
| 51 |                    |      |                         |                                |                       |
| 52 |                    |      |                         |                                |                       |
| 53 |                    |      |                         |                                |                       |
| 54 |                    |      |                         |                                |                       |
| 55 |                    |      |                         |                                |                       |
| 56 |                    |      |                         |                                |                       |
| 57 |                    |      |                         |                                |                       |
| 58 |                    |      |                         |                                |                       |
| 59 |                    |      |                         |                                |                       |
| 60 |                    |      |                         |                                |                       |



**Table 4. Synthesis Matrix juxtaposing Interventions, Barriers and Facilitators**

| Interventions                                                                                                                         | Barriers addressed                                                                                                                                                                                                             | Facilitators addressed                                                                                                                                                                |
|---------------------------------------------------------------------------------------------------------------------------------------|--------------------------------------------------------------------------------------------------------------------------------------------------------------------------------------------------------------------------------|---------------------------------------------------------------------------------------------------------------------------------------------------------------------------------------|
| <b>Tailored, targeted messaging</b><br>Dobbins et al. 2009 <sup>33</sup>                                                              | Lack of access<br>Lack of awareness<br>Lack of familiarity                                                                                                                                                                     | A graded format<br>Delivery: Web-based<br>Consistent presentation<br>Increased access                                                                                                 |
| <b>Educational visits</b><br>Wyatt et al. 1998 <sup>28</sup>                                                                          | Lack of use<br>Lack of awareness<br>Lack of access<br>Lack of familiarity<br>Lack of usefulness<br>Lack of motivation<br>External barriers                                                                                     | Usefulness<br>Training<br>Peer-group support<br>Delivery: CD ROM<br>Perceived ease of use<br>Position in an organisation<br>Organisational value<br>Motivation, Increased access,     |
| <b>Brief summaries</b><br>Oermann et al 2007 <sup>29</sup>                                                                            | Lack of awareness<br>Lack of access<br>Lack of familiarity<br>Lack of usefulness<br>External barriers<br>Lack of relevance<br>Ignore target audience                                                                           | Usefulness<br>Highlighted content<br>A graded format<br>Delivery: Web-based<br>Position in an organisation<br>Increased access                                                        |
| <b>Multi-faceted educational intervention</b><br>Gulmezoglu et al. 2006 <sup>30</sup>                                                 | Lack of use<br>Lack of awareness<br>Lack of access<br>Lack of familiarity<br>Lack of usefulness<br>Lack of motivation<br>External barriers<br>Lack of relevance<br>Lack of implementation strategies<br>Ignore target audience | Training<br>Peer-group support<br>Delivery: Web-based<br>Organisational value<br>Motivation<br>Increased access<br>Familiarity with computers                                         |
| <b>Manual of Cochrane Reviews</b><br>Harris et al. 2006 <sup>31</sup>                                                                 | Lack of use<br>Lack of awareness<br>Lack of access<br>Lack of familiarity<br>Lack of usefulness<br>External barriers<br>Lack of relevance<br>Ignore target audience<br>Lack of implementation strategies                       | Usefulness<br>Highlighted content<br>Format: summaries<br>Delivery: paper-based<br>Ability to improve confidence<br>Position in an organisation<br>Motivation<br>Increased access     |
| <b>E- learning course</b><br>Kulier et al. 2009 <sup>32</sup><br>Kulier et al. 2008 <sup>34</sup><br>Hadley et al. 2010 <sup>35</sup> | Lack of use<br>Lack of awareness<br>Lack of access<br>Lack of familiarity<br>Lack of usefulness<br>External barriers<br>Lack of relevance<br>Lack of implications<br>Ignore target audience                                    | Usefulness<br>Training<br>Peer-group support<br>Delivery: Web-based<br>Position in an organisation<br>Motivation<br>Increased access<br>Increased confidence<br>Organisational values |

|                                        | Lack of implementation strategies |                             |
|----------------------------------------|-----------------------------------|-----------------------------|
| <b>Access to online registry</b>       | Lack of awareness                 | Delivery: Web-based         |
| Dobbins et al. 2009 <sup>33</sup>      | Lack of access                    | Increased access            |
| <b>Knowledge brokers</b>               | Lack of awareness                 | Usefulness                  |
| Dobbins et al. 2009 <sup>33</sup>      | Lack of access                    | Graded format               |
|                                        | Lack of familiarity               | Training                    |
|                                        | Lack of usefulness                | Peer-group support          |
|                                        | Lack of use                       | Delivery: Web-based         |
|                                        | Lack of relevance                 | Consistent presentation     |
|                                        | Lack of implications for practice | Position in an organisation |
|                                        | Lack of implementation strategies | Organisational value        |
|                                        | Ignore target audience            | Increased access            |
|                                        | Lack of workshop attendance       |                             |
|                                        | Lack of positive climate          |                             |
| <b>Computer-based (CD-ROM) session</b> | Lack of use                       | Usefulness                  |
| Davis et al. 2008 <sup>36</sup>        | Lack of awareness                 | Training                    |
| Davis et al. 2007 <sup>29</sup>        | Lack of access                    | Peer-group support          |
|                                        | Lack of familiarity               | Delivery: CD ROM            |
|                                        | Lack of usefulness                | Position in an organisation |
|                                        | External barriers                 | Organisational value        |
|                                        | Lack of implications for practice | Increased access            |
|                                        | Lack of implementation strategies | Familiarity (computers)     |
|                                        | Ignore target audience            |                             |

## Supplementary file

### Studies that might be expected to meet criteria for inclusion in the review but did not

DOBBINS, M., CILISKA, D., COCKERILL, R., BARNESLEY, J. & DICENSO, A., 2002. A framework for the dissemination and utilization of research for health-care policy and practice. *The Online Journal of Knowledge Synthesis for Nursing*, 9, 7. Not a survey, focus group or interview study, or an intervention.

GLASZIOU, P., GUYATT, G. H., DANS, A. L., DANS, L. F., STRAUS, S. & SACKETT, D. L. 1998. Applying the results of trials and systematic reviews to individual patients. *ACP Journal Club*, 129, A15-6. Not a survey, focus group or interview study, or an intervention.

GRIMSHAW, J. M., SANTESSO, N., CUMPSTON, M., MAYHEW, A. and MCGOWAN, J. 2006. Knowledge for knowledge translation: the role of the Cochrane Collaboration., *Journal of Continuing Education in the Health Professions*, 26, 55-62. Not a survey, focus group or interview study, or an intervention.

GRUEN, R. L., MORRIS, P. S., MCDONALD, E. L. and BAILIE, R. S., 2005. Making systematic reviews more useful for policy-makers. *Bulletin of the World Health Organisation*, 83, 480. A letter/essay.

LAVIS, J. N., 2006. Research, public policymaking, and knowledge-translation processes: Canadian efforts to build bridges. *Journal of Continuing Education in the Health Professions*, 26, 37-45. Not a survey, focus group or interview, or an intervention.

PETTICREW, M., WHITEHEAD, M., MACINTYRE, S. J., GRAHAM, H. & EGAN, M. 2004. Evidence for public health policy on inequalities: 1: the reality according to policymakers. *Journal of Epidemiology and Community Health*, 58, 811-6. Not specifically related to systematic reviews.

SILAGY, C. A., WELLER, D. P., MIDDLETON, P. F. and DOUST, J. A., 1999. General practitioners' use of evidence databases. *Medical Journal of Australia*, 170, 393. A comment on previous studies.

SHELDON, T. A., 2005. Making evidence synthesis more useful for management and policy-making. *Journal of Health Service and Research Policy*, 10 Suppl 1, 1-5. An essay, not a survey, focus group, or an interview, or an intervention.

VOLMINK, J., SIEGFRIED, N., ROBERTSON, K. and GÜLMEZOGLU, A. M., 2004. Research synthesis and dissemination as a bridge to knowledge management: the Cochrane Collaboration. *Bulletin of the World Health Organisation*, 82, 778-83. An essay. Not a survey, a focus group, an interview, or an intervention.
