# Supplementary material for: Improving the uptake of systematic reviews: a systematic review of intervention effectiveness and relevance
Source: HighWire-hosted journal article supplement (doi:10.1136/bmjopen-2014-005834), 2014-10-01
Supplement: bmjopen-2014-005834supp.pdf [file bmjopen-2014-005834supp.pdf]

## Supplementary file

### Studies that might be expected to meet criteria for inclusion in the review but did not

DOBBINS, M., CILISKA, D., COCKERILL, R., BARNESLEY, J. & DICENSO, A., 2002. A framework for the dissemination and utilization of research for health-care policy and practice. *The Online Journal of Knowledge Synthesis for Nursing*, 9, 7. Not a survey, focus group or interview study, or an intervention.

GLASZIOU, P., GUYATT, G. H., DANS, A. L., DANS, L. F., STRAUS, S. & SACKETT, D. L. 1998. Applying the results of trials and systematic reviews to individual patients. *ACP Journal Club*, 129, A15-6. Not a survey, focus group or interview study, or an intervention.

GRIMSHAW, J. M., SANTESSO, N., CUMPSTON, M., MAYHEW, A. and MCGOWAN, J. 2006. Knowledge for knowledge translation: the role of the Cochrane Collaboration., *Journal of Continuing Education in the Health Professions*, 26, 55-62. Not a survey, focus group or interview study, or an intervention.

GRUEN, R. L., MORRIS, P. S., MCDONALD, E. L. and BAILIE, R. S., 2005. Making systematic reviews more useful for policy-makers. *Bulletin of the World Health Organisation*, 83, 480. A letter/essay.

LAVIS, J. N., 2006. Research, public policymaking, and knowledge-translation processes: Canadian efforts to build bridges. *Journal of Continuing Education in the Health Professions*, 26, 37-45. Not a survey, focus group or interview, or an intervention.

PETTICREW, M., WHITEHEAD, M., MACINTYRE, S. J., GRAHAM, H. & EGAN, M. 2004. Evidence for public health policy on inequalities: 1: the reality according to policymakers. *Journal of Epidemiology and Community Health*, 58, 811-6. Not specifically related to systematic reviews.

SILAGY, C. A., WELLER, D. P., MIDDLETON, P. F. and DOUST, J. A., 1999. General practitioners' use of evidence databases. *Medical Journal of Australia*, 170, 393. A comment on previous studies.

SHELDON, T. A., 2005. Making evidence synthesis more useful for management and policy-making. *Journal of Health Service and Research Policy*, 10 Suppl 1, 1-5. An essay, not a survey, focus group, or an interview, or an intervention.

VOLMINK, J., SIEGFRIED, N., ROBERTSON, K. and GÜLMEZOĞLU, A. M., 2004. Research synthesis and dissemination as a bridge to knowledge management: the Cochrane Collaboration. *Bulletin of the World Health Organisation*, 82, 778-83. An essay. Not a survey, a focus group, an interview, or an intervention.
